# Supplementary material for: The Leukocyte Nuclear Envelope Proteome Varies with Cell Activation and Contains Novel Transmembrane Proteins That Affect Genome Architecture
Source: PubMed Central journal article supplement — Mol Cell Proteomics. 2010 Aug 6;9(12):2571–85. doi: 10.1074/mcp.M110.002915 (PMC3101955; doi:10.1074/mcp.m110.002915), 2010-08-06
Supplement: supp_M110.002915_KorfaliMCP_SuppTableS1.pdf [file supp_M110.002915_KorfaliMCP_SuppTableS1.pdf]

See EXPERIMENTAL PROCEDURES for details

‡Schirmer et al, 2003

PK: high pH proteinase K on membranous pellets left-over after Ti digestion
