# Supplementary material for: The Leukocyte Nuclear Envelope Proteome Varies with Cell Activation and Contains Novel Transmembrane Proteins That Affect Genome Architecture
Source: PubMed Central journal article supplement — Mol Cell Proteomics. 2010 Aug 6;9(12):2571–85. doi: 10.1074/mcp.M110.002915 (PMC3101955; doi:10.1074/mcp.m110.002915), 2010-08-06
Supplement: supp_M110.002915_KorfaliMCP_SuppTableS3.pdf [file supp_M110.002915_KorfaliMCP_SuppTableS3.pdf]

Table with columns: rk, ORTHO\_GROUPS, GENE\_NAME, LOCUS, Proteins In Group, Description, Sequence Count, Spectrum Count, Coverage, Length, MW, pI, MatchID, Z\_XCOR, DECON, MM50, +HH, +SRK, Ion Proportion, Contig, Sequence Position, Tryptic, Unique. The table lists various protein identifications and their associated data points.

| rk | ORTHO_GROUPS    | GENE_NAME           | Locus               | Proteins In Group | Description                                                       | Sequence Count | Spectrum Count | Coverage | Length | MW    | pI  | MatchID  | Z            | XC | Decon  | HM     | CaM   | Ion   | SPKR | Proportion | Conc | Sequence         | Position | Tryptic | Unique |
|----|-----------------|---------------------|---------------------|-------------------|-------------------------------------------------------------------|----------------|----------------|----------|--------|-------|-----|----------|--------------|----|--------|--------|-------|-------|------|------------|------|------------------|----------|---------|--------|
|    |                 |                     |                     |                   |                                                                   |                |                |          |        |       |     |          |              |    |        |        |       |       |      |            |      | Sequence         |          |         |        |
| 41 | ENSG00000162365 | ENSNMUSG00000096071 | ENSNRNO300000029919 |                   | cytochrome P450, family 4, subfamily a, polypeptide 12 [Mus musc] | 8              | 26             | 16.5     | 508    | 85850 | 9.1 | MmM03440 | 109_22522252 | 2  | 3.2183 | 0.2036 | 14400 | 14005 | 1    | 70.85333   | 1    | R.HSHSFLFSGSGRAN | 441      | 2       |        |
| 42 | ENSG00000162365 | ENSNMUSG00000096071 | ENSNRNO300000029919 |                   | cytochrome P450, family 4, subfamily a, polypeptide 12 [Mus musc] | 8              | 26             | 16.5     | 508    | 85850 | 9.1 | MmM03440 | 109_22522252 | 2  | 3.2183 | 0.2036 | 14400 | 14005 | 1    | 70.85333   | 1    | R.HSHSFLFSGSGRAN | 441      | 2       |        |
| 43 | ENSG00000162365 | ENSNMUSG00000096071 | ENSNRNO300000029919 |                   | cytochrome P450, family 4, subfamily a, polypeptide 12 [Mus musc] | 8              | 26             | 16.5     | 508    | 85850 | 9.1 | MmM03440 | 109_22522252 | 2  | 3.2183 | 0.2036 | 14400 | 14005 | 1    | 70.85333   | 1    | R.HSHSFLFSGSGRAN | 441      | 2       |        |
| 44 | ENSG00000162365 | ENSNMUSG00000096071 | ENSNRNO300000029919 |                   | cytochrome P450, family 4, subfamily a, polypeptide 12 [Mus musc] | 8              | 26             | 16.5     | 508    | 85850 | 9.1 | MmM03440 | 109_22522252 | 2  | 3.2183 | 0.2036 | 14400 | 14005 | 1    | 70.85333   | 1    | R.HSHSFLFSGSGRAN | 441      | 2       |        |
| 45 | ENSG00000162365 | ENSNMUSG00000096071 | ENSNRNO300000029919 |                   | cytochrome P450, family 4, subfamily a, polypeptide 12 [Mus musc] | 8              | 26             | 16.5     | 508    | 85850 | 9.1 | MmM03440 | 109_22522252 | 2  | 3.2183 | 0.2036 | 14400 | 14005 | 1    | 70.85333   | 1    | R.HSHSFLFSGSGRAN | 441      | 2       |        |
| 46 | ENSG00000162365 | ENSNMUSG00000096071 | ENSNRNO300000029919 |                   | cytochrome P450, family 4, subfamily a, polypeptide 12 [Mus musc] | 8              | 26             | 16.5     | 508    | 85850 | 9.1 | MmM03440 | 109_22522252 | 2  | 3.2183 | 0.2036 | 14400 | 14005 | 1    | 70.85333   | 1    | R.HSHSFLFSGSGRAN | 441      | 2       |        |
| 47 | ENSG00000162365 | ENSNMUSG00000096071 | ENSNRNO300000029919 |                   | cytochrome P450, family 4, subfamily a, polypeptide 12 [Mus musc] | 8              | 26             | 16.5     | 508    | 85850 | 9.1 | MmM03440 | 109_22522252 | 2  | 3.2183 | 0.2036 | 14400 | 14005 | 1    | 70.85333   | 1    | R.HSHSFLFSGSGRAN | 441      | 2       |        |
| 48 | ENSG00000162365 | ENSNMUSG00000096071 | ENSNRNO300000029919 |                   | cytochrome P450, family 4, subfamily a, polypeptide 12 [Mus musc] | 8              | 26             | 16.5     | 508    | 85850 | 9.1 | MmM03440 | 109_22522252 | 2  | 3.2183 | 0.2036 | 14400 | 14005 | 1    | 70.85333   | 1    | R.HSHSFLFSGSGRAN | 441      | 2       |        |
| 49 | ENSG00000162365 | ENSNMUSG00000096071 | ENSNRNO300000029919 |                   | cytochrome P450, family 4, subfamily a, polypeptide 12 [Mus musc] | 8              | 26             | 16.5     | 508    | 85850 | 9.1 | MmM03440 | 109_22522252 | 2  | 3.2183 | 0.2036 | 14400 | 14005 | 1    | 70.85333   | 1    | R.HSHSFLFSGSGRAN | 441      | 2       |        |
| 50 | ENSG00000162365 | ENSNMUSG00000096071 | ENSNRNO300000029919 |                   | cytochrome P450, family 4, subfamily a, polypeptide 12 [Mus musc] | 8              | 26             | 16.5     | 508    | 85850 | 9.1 | MmM03440 | 109_22522252 | 2  | 3.2183 | 0.2036 | 14400 | 14005 | 1    | 70.85333   | 1    | R.HSHSFLFSGSGRAN | 441      | 2       |        |

Table with columns: rk, ORTHO\_Group3, LOCNAME, Locus, Proteins in Group, Description, Sequence Count, Spectrum Count, Coverage, Length, M, pI, MatchID, Z Score, DeTON, M80, Val, CaM, Ca, Ion, Proportion, Count, Sequence, Position, Tryptic, Unique. The table contains a large number of rows detailing protein identifications and their associated data.



| rk       | ORTHO_GROUPS  | GENE_NAME        | Locus | Proteins In Group  | Description | Sequence                              |                                       | Coverage                              | Length                                                  | MW | pI | MatchID | Z    | XCcorr | DeltCN | M+H+                                | C+H+ | Ion    | SpRk   | Proportion | Count  | Sequence | Sequence Position | Tryptic | Unique                |   |      |   |
|----------|---------------|------------------|-------|--------------------|-------------|---------------------------------------|---------------------------------------|---------------------------------------|---------------------------------------------------------|----|----|---------|------|--------|--------|-------------------------------------|------|--------|--------|------------|--------|----------|-------------------|---------|-----------------------|---|------|---|
|          |               |                  |       |                    |             | Count                                 | Count                                 |                                       |                                                         |    |    |         |      |        |        |                                     |      |        |        |            |        |          |                   |         |                       |   |      |   |
| 228      | ENSG000007568 | ENSMUSG000000281 | 16    | ENSRNOG00000017265 | TMEM131     | g 119372306 refNP_061360.2            | g 119372306 refNP_061360.2            | g 146233754 refXP_001477              | transmembrane protein 131 [Mus musculus]                | 1  | 1  | 0.7     | 1877 | 204650 | 8.5    | MmNcOH4M_Iver_CNBf1_212.1641.1641.2 | 2    | 2.114  | 0.182  | 1540.44    | 1538.7 | 1        | 53.846197         | 1       | RLSPAPLTPSPPERA       | 1 | 1317 | 2 |
| 229      |               |                  |       |                    |             | Contaminant_GRP8_HUMAN                | Contaminant_GRP8_HUMAN                | Contaminant_GRP8_HUMAN                | Contaminant_GRP8_HUMAN                                  | 1  | 2  | 2.1     | 653  | 72116  | 6.1    | MmNcOH4M_Iver_CNBf1_201.1726.1726.2 | 2    | 2.951  | 0.2783 | 1568.68    | 1567.7 | 1        | 57.692307         | 1       | RITPSYVAFTEGERL       | 1 | 61   | 2 |
| 229      |               |                  |       |                    |             | Contaminant_GRP8_HUMAN                | Contaminant_GRP8_HUMAN                | Contaminant_GRP8_HUMAN                | Contaminant_GRP8_HUMAN                                  | 1  | 2  | 2.1     | 653  | 72116  | 6.1    | MmNcOH4M_Iver_CNBf1_101.1692.1692.2 | 2    | 3.177  | 0.3412 | 1597.62    | 1597.7 | 1        | 53.846197         | 1       | RITPSYVAFTEGERL       | 1 | 61   | 2 |
| 230      |               |                  |       |                    |             | Contaminant_g 1463016 refNP_077957    | Contaminant_g 1463016 refNP_077957    | Contaminant_g 1463016 refNP_077957    | lysyl endopeptidase (EC 3.4.21.50) - Lysobacter enzymes | 4  | 6  | 12.3    | 269  | 27961  | 6.7    | MmNcOH4M_Iver_CNBf1_212.1827.1827.2 | 2    | 4.5079 | 0.4506 | 1927.17    | 1921.1 | 1        | 58.823532         | 2       | RDDNFAGATAHHPNVAEK.R  | 1 | 138  | 2 |
| 230      |               |                  |       |                    |             | Contaminant_g 1463016 refNP_077957    | Contaminant_g 1463016 refNP_077957    | Contaminant_g 1463016 refNP_077957    | lysyl endopeptidase (EC 3.4.21.50) - Lysobacter enzymes | 4  | 6  | 12.3    | 269  | 27961  | 6.7    | MmNcOH4M_Iver_CNBf1_108.1355.1355.3 | 3    | 3.3223 | 0.2224 | 2077.18    | 2077.3 | 1        | 37.5              | 1       | RDDNFAGATAHHPNVAEK.R  | 1 | 138  | 2 |
| 230      |               |                  |       |                    |             | Contaminant_g 1463016 refNP_077957    | Contaminant_g 1463016 refNP_077957    | Contaminant_g 1463016 refNP_077957    | lysyl endopeptidase (EC 3.4.21.50) - Lysobacter enzymes | 4  | 6  | 12.3    | 269  | 27961  | 6.7    | MmNcOH4M_Iver_CNBf1_201.0006.0006.2 | 2    | 3.8141 | 0.2849 | 1428.33    | 1428.5 | 1        | 76.92308          | 2       | RVFTSYTGSGTATRL       | 2 | 230  | 2 |
| 230      |               |                  |       |                    |             | Contaminant_g 1463016 refNP_077957    | Contaminant_g 1463016 refNP_077957    | Contaminant_g 1463016 refNP_077957    | lysyl endopeptidase (EC 3.4.21.50) - Lysobacter enzymes | 4  | 6  | 12.3    | 269  | 27961  | 6.7    | MmNcOH4M_Iver_CNBf1_108.1360.1360.2 | 2    | 4.6549 | 0.3542 | 2076.87    | 2077.3 | 1        | 62.77778          | 1       | RDDNFAGATAHHPNVAEK.R  | 1 | 138  | 2 |
| 231      |               |                  |       |                    |             | Contaminant_TRYP-SN                   | Contaminant_TRYP-SN                   | Contaminant_TRYP-SN                   | no description                                          | 3  | 7  | 18.3    | 229  | 23993  | 7.9    | MmNcOH4M_Iver_CNBf1_202.2016.2016.2 | 2    | 4.3953 | 0.4201 | 2163.34    | 2164.3 | 1        | 42.102093         | 2       | RLGEDNNVVEGNEQTSASK.S | 1 | 96   | 2 |
| 231      |               |                  |       |                    |             | Contaminant_TRYP-SN                   | Contaminant_TRYP-SN                   | Contaminant_TRYP-SN                   | no description                                          | 3  | 7  | 18.3    | 229  | 23993  | 7.9    | MmNcOH4M_Iver_CNBf1_101.2039.2039.2 | 2    | 3.7573 | 0.2425 | 2163.84    | 2164.3 | 5        | 39.473086         | 1       | RLGEDNNVVEGNEQTSASK.S | 1 | 96   | 2 |
| 231      |               |                  |       |                    |             | Contaminant_TRYP-SN                   | Contaminant_TRYP-SN                   | Contaminant_TRYP-SN                   | no description                                          | 3  | 7  | 18.3    | 229  | 23993  | 7.9    | MmNcOH4M_Iver_CNBf1_108.2078.2078.3 | 3    | 4.0932 | 0.128  | 2014.63    | 2015.9 | 1        | 33.333336         | 3       | K.SVSPSPVYNTLNNDMLKLS | 1 | 76   | 2 |
| 231      |               |                  |       |                    |             | Contaminant_TRYP-SN                   | Contaminant_TRYP-SN                   | Contaminant_TRYP-SN                   | no description                                          | 3  | 7  | 18.3    | 229  | 23993  | 7.9    | MmNcOH4M_Iver_CNBf1_108.2555.2555.2 | 2    | 5.0282 | 0.3948 | 2016.12    | 2015.9 | 1        | 47.61905          | 1       | K.SVSPSPVYNTLNNDMLKLS | 1 | 76   | 2 |
| 232      |               |                  |       |                    |             | Contaminant_KERATIN13                 | Contaminant_KERATIN13                 | Contaminant_KERATIN13                 | no description                                          | 1  | 1  | 1.6     | 583  | 59519  | 6.2    | MmNcOH4M_Iver_CNBf1_208.1370.1370.2 | 2    | 2.1177 | 0.1235 | 1064.53    | 1065.3 | 2        | 75                | 1       | RLASVDEKRA            | 1 | 167  | 2 |
| 233      |               |                  |       |                    |             | Contaminant_KERATIN13                 | Contaminant_KERATIN13                 | Contaminant_KERATIN13                 | no description                                          | 1  | 1  | 1.9     | 643  | 65494  | 6.6    | MmNcOH4M_Iver_CNBf1_206.0713.0713.2 | 2    | 2.3277 | 0.1408 | 1341.76    | 1341.5 | 5        | 54.545456         | 1       | K.SKAAEALSYGK.Y       | 1 | 384  | 2 |
| 234      |               |                  |       |                    |             | g 11414559 refNP_112447.2             | g 11414559 refNP_112447.2             | g 11414559 refNP_112447.2             | leucine complex 2, basic, gene 8 [Mus musculus]         | 1  | 2  | 2.4     | 490  | 54565  | 5.8    | MmNcOH4M_Iver_CNBf1_202.2454.2454.2 | 2    | 3.6796 | 0.3051 | 1420.6     | 1420.6 | 1        | 66.181816         | 2       | RLGLYDENLR.LG         | 2 | 204  | 2 |
| 196      | SHUFFLED      |                  |       |                    |             | SHUFFLED_g 3042204 refNP_78076.1      | SHUFFLED_g 3042204 refNP_78076.1      | SHUFFLED_g 3042204 refNP_78076.1      | FALSE POSITIVE                                          | 1  | 2  | 1.7     | 705  | 81252  | 6.2    | MmNcOH4M_Iver_CNBf1_204.1965.1965.3 | 3    | 3.1744 | 0.1291 | 1960.9     | 1958.8 | 2        | 45.454546         | 2       | K.KVQVPCALNPP.R       | 2 | 182  | 2 |
| SHUFFLED |               |                  |       |                    |             | SHUFFLED_g 12446933 refNP_001074828.1 | SHUFFLED_g 12446933 refNP_001074828.1 | SHUFFLED_g 12446933 refNP_001074828.1 | FALSE POSITIVE                                          | 1  | 2  | 0.3     | 279  | 309095 | 5.8    | MmNcOH4M_Iver_CNBf1_202.1042.1042.2 | 2    | 2.1551 | 0.156  | 947.17     | 948.16 | 6        | 85.71429          | 2       | R.RALAF.LR.T          | 2 | 1471 | 2 |
