# Supplementary material for: The Leukocyte Nuclear Envelope Proteome Varies with Cell Activation and Contains Novel Transmembrane Proteins That Affect Genome Architecture
Source: PubMed Central journal article supplement — Mol Cell Proteomics. 2010 Aug 6;9(12):2571–85. doi: 10.1074/mcp.M110.002915 (PMC3101955; doi:10.1074/mcp.m110.002915), 2010-08-06
Supplement: supp_M110.002915_KorfaliMCP_SuppTableS4.pdf [file supp_M110.002915_KorfaliMCP_SuppTableS4.pdf]

[illegible]



5



| ORTHO_GROUPS | GENE_NAME     | Locus              | Proteins in Group  | Description | Sequence Count            | Spectrum Count            | Coverage | Length | MW   | pI   | MatchID | Z | Xcorr | DelCn                        | M+H+    | Calcd  | SpRk   | Ion   | Proportion | Cont  | Sequence | Position | Tryptic                | Unique |   |
|--------------|---------------|--------------------|--------------------|-------------|---------------------------|---------------------------|----------|--------|------|------|---------|---|-------|------------------------------|---------|--------|--------|-------|------------|-------|----------|----------|------------------------|--------|---|
| 4            | ENSG000000493 | ENSMUSG00000008574 | ENSRNOG00000020951 | SLC4A1      | g 76434687 refNP_036783.2 | g 76434687 refNP_036783.2 | 235      | 3239   | 99.4 | 92.0 | 10244   | 4 | 0.84  | RnSdMAM_HMM_ref_Pc_10020440  | 00840.1 | 2.347  | 3.4468 | 10857 | 1087.9     | 18    | 75.5143  | 5        | 1.LGAPHHGYDTQLGRA      | 282    | 1 |
| 4            | ENSG000000493 | ENSMUSG00000008574 | ENSRNOG00000020951 | SLC4A1      | g 76434687 refNP_036783.2 | g 76434687 refNP_036783.2 | 235      | 3239   | 99.4 | 92.0 | 10244   | 4 | 0.84  | RnSdMAM_HMM_ref_Pc_206070070 | 00774.1 | 1.7352 | 3.304  | 1522  | 177        | 162.7 | 69.20074 | 2        | 2.HAEKDEKQVPA          | 177    | 0 |
| 4            | ENSG000000493 | ENSMUSG00000008574 | ENSRNOG00000020951 | SLC4A1      | g 76434687 refNP_036783.2 | g 76434687 refNP_036783.2 | 235      | 3239   | 99.4 | 92.0 | 10244   | 4 | 0.84  | RnSdMAM_HMM_ref_Pc_11020602  | 00829.2 | 1.7547 | 3.222  | 1604  | 1603       | 2.0   | 69.20074 | 3        | 3.LLGLKQVPA            | 376    | 1 |
| 4            | ENSG000000493 | ENSMUSG00000008574 | ENSRNOG00000020951 | SLC4A1      | g 76434687 refNP_036783.2 | g 76434687 refNP_036783.2 | 235      | 3239   | 99.4 | 92.0 | 10244   | 4 | 0.84  | RnSdMAM_HMM_ref_Pc_206020602 | 00824.1 | 3.8109 | 2.124  | 1783  | 1784       | 2.8   | 43.5125  | 1        | 1.ADGSGDQDEGDDPLRR     | 376    | 1 |
| 4            | ENSG000000493 | ENSMUSG00000008574 | ENSRNOG00000020951 | SLC4A1      | g 76434687 refNP_036783.2 | g 76434687 refNP_036783.2 | 235      | 3239   | 99.4 | 92.0 | 10244   | 4 | 0.84  | RnSdMAM_HMM_ref_Pc_11020602  | 00829.2 | 3.1619 | 2.124  | 1783  | 1784       | 2.8   | 43.5125  | 1        | 1.VLVAQVGLPQV          | 376    | 1 |
| 4            | ENSG000000493 | ENSMUSG00000008574 | ENSRNOG00000020951 | SLC4A1      | g 76434687 refNP_036783.2 | g 76434687 refNP_036783.2 | 235      | 3239   | 99.4 | 92.0 | 10244   | 4 | 0.84  | RnSdMAM_HMM_ref_Pc_11020602  | 00829.2 | 2.3693 | 2.288  | 2397  | 2399       | 5.5   | 37.14287 | 1        | 1.AADGSGDQDEGDDPLRRRTG | 376    | 0 |
| 4            | ENSG000000493 | ENSMUSG00000008574 | ENSRNOG00000020951 | SLC4A1      | g 76434687 refNP_036783.2 | g 76434687 refNP_036783.2 | 235      | 3239   | 99.4 | 92.0 | 10244   | 4 | 0.84  | RnSdMAM_HMM_ref_Pc_11020602  | 00829.2 | 2.5935 | 3.308  | 1821  | 1821       | 1.1   | 73.6241  | 46       | 4.KTFLDLKSLAVGNKL      | 131    | 2 |
| 4            | ENSG000000493 | ENSMUSG00000008574 | ENSRNOG00000020951 | SLC4A1      | g 76434687 refNP_036783.2 | g 76434687 refNP_036783.2 | 235      | 3239   | 99.4 | 92.0 | 10244   | 4 | 0.84  | RnSdMAM_HMM_ref_Pc_11020602  | 00829.2 | 3.2977 | 3.308  | 1821  | 1821       | 1.1   | 73.6241  | 46       | 4.KTFLDLKSLAVGNKL      | 131    | 2 |
| 4            | ENSG000000493 | ENSMUSG00000008574 | ENSRNOG00000020951 | SLC4A1      | g 76434687 refNP_036783.2 | g 76434687 refNP_036783.2 | 235      | 3239   | 99.4 | 92.0 | 10244   | 4 | 0.84  | RnSdMAM_HMM_ref_Pc_11020602  | 00829.2 | 2.7490 | 2.503  | 1265  | 1265       | 2.7   | 66.6667  | 2        | 2.HAEKDEKQVPA          | 177    | 0 |
| 4            | ENSG000000493 | ENSMUSG00000008574 | ENSRNOG00000020951 | SLC4A1      | g 76434687 refNP_036783.2 | g 76434687 refNP_036783.2 | 235      | 3239   | 99.4 | 92.0 | 10244   | 4 | 0.84  | RnSdMAM_HMM_ref_Pc_11020602  | 00829.2 | 3.4601 | 3.364  | 1821  | 1821       | 1.1   | 73.6241  | 46       | 4.KTFLDLKSLAVGNKL      | 131    | 2 |
| 4            | ENSG000000493 | ENSMUSG00000008574 | ENSRNOG00000020951 | SLC4A1      | g 76434687 refNP_036783.2 | g 76434687 refNP_036783.2 | 235      | 3239   | 99.4 | 92.0 | 10244   | 4 | 0.84  | RnSdMAM_HMM_ref_Pc_11020602  | 00829.2 | 3.0538 | 3.184  | 2034  | 2034       | 8.8   | 38.8889  | 1        | 1.VLVAQVGLPQV          | 376    | 0 |
| 4            | ENSG000000493 | ENSMUSG00000008574 | ENSRNOG00000020951 | SLC4A1      | g 76434687 refNP_036783.2 | g 76434687 refNP_036783.2 | 235      | 3239   | 99.4 | 92.0 | 10244   | 4 | 0.84  | RnSdMAM_HMM_ref_Pc_11020602  | 00829.2 | 3.0538 | 3.184  | 2034  | 2034       | 8.8   | 38.8889  | 1        | 1.VLVAQVGLPQV          | 376    | 0 |
| 4            | ENSG000000493 | ENSMUSG00000008574 | ENSRNOG00000020951 | SLC4A1      |                           |                           |          |        |      |      |         |   |       |                              |         |        |        |       |            |       |          |          |                        |        |   |



[illegible]





12

[illegible]













0

21

[illegible]







3









31

[illegible]























44



46







50

51



53

5







58

59





| GENE_GROUPS                                            | GENE_NAME | Locus                   | Proteins in Group       | Description                                               | Sequence Count | Spectrum Count | Coverage | Length | MW    | pI  | MatchID                             | Z | Xcorr | DelCN  | M+H+    | Calcd  | SpRk | Ion      | Proportion | Count               | Sequence | Position | Tryptic | Unique |
|--------------------------------------------------------|-----------|-------------------------|-------------------------|-----------------------------------------------------------|----------------|----------------|----------|--------|-------|-----|-------------------------------------|---|-------|--------|---------|--------|------|----------|------------|---------------------|----------|----------|---------|--------|
| 60 ENSG0000013790 ENSMUSG0000002283 ENSRG0000000001770 | EHAHAD    | g1942431ref NP_058260.1 | g1942431ref NP_058260.1 | "enoyl-Coenzyme A hydratase-3 (hydratase) Coenzyme A dehy | 71             | 405            | 67       | 722    | 78658 | 9.2 | IRnRnAHM_Mus_Pnc_113,022707.02377.2 | 2 | 4.264 | 0.3084 | 2131.77 | 2152.0 | 1    | 41.66694 | 12         | KLVSTVLEAVFVDEANLKK | 370      | 2        | 1       |        |
| 60 ENSG0000013790 ENSMUSG0000002283 ENSRG0000000001770 | EHAHAD    | g1942431ref NP_058260.1 | g1942431ref NP_058260.1 | "enoyl-Coenzyme A hydratase-3 (hydratase) Coenzyme A dehy | 71             | 405            | 67       | 722    | 78658 | 9.2 | IRnRnAHM_Mus_Pnc_21,009953.00993.2  | 2 | 2.924 | 1.774  | 1034.53 | 1034.8 | 2    | 66.625   | 1          | KAASTVDFVDEANLKK    | 370      | 0        | 1       |        |
| 60 ENSG0000013790 ENSMUSG0000002283 ENSRG0000000001770 | EHAHAD    | g1942431ref NP_058260.1 | g1942431ref NP_058260.1 | "enoyl-Coenzyme A hydratase-3 (hydratase) Coenzyme A dehy | 71             | 405            | 67       | 722    | 78658 | 9.2 | IRnRnAHM_Mus_Pnc_113,022707.02377.2 | 2 | 4.264 | 0.3084 | 2131.77 | 2152.0 | 1    | 41.66694 | 12         | KLVSTVLEAVFVDEANLKK | 370      | 2        | 1       |        |
| 60 ENSG0000013790 ENSMUSG0000002283 ENSRG0000000001770 | EHAHAD    | g1942431ref NP_058260.1 | g1942431ref NP_058260.1 | "enoyl-Coenzyme A hydratase-3 (hydratase) Coenzyme A dehy | 71             | 405            | 67       | 722    | 78658 | 9.2 | IRnRnAHM_Mus_Pnc_21,009953.00993.2  | 2 | 2.924 | 1.774  | 1034.53 | 1034.8 | 2    | 66.625   | 1          | KAASTVDFVDEANLKK    | 370      | 0        | 1       |        |
| 60 ENSG0000013790 ENSMUSG0000002283 ENSRG0000000001770 | EHAHAD    | g1942431ref NP_058260.1 | g1942431ref NP_058260.1 | "enoyl-Coenzyme A hydratase-3 (hydratase) Coenzyme A dehy | 71             | 405            | 67       | 722    | 78658 | 9.2 | IRnRnAHM_Mus_Pnc_113,022707.02377.2 | 2 | 4.264 | 0.3084 | 2131.77 | 2152.0 | 1    | 41.66694 | 12         | KLVSTVLEAVFVDEANLKK | 370      | 2        | 1       |        |
| 60 ENSG0000013790 ENSMUSG0000002283 ENSRG0000000001770 | EHAHAD    | g1942431ref NP_058260.1 | g1942431ref NP_058260.1 | "enoyl-Coenzyme A hydratase-3 (hydratase) Coenzyme A dehy | 71             | 405            | 67       | 722    | 78658 | 9.2 | IRnRnAHM_Mus_Pnc_21,009953.00993.2  | 2 | 2.924 | 1.774  | 1034.53 | 1034.8 | 2    | 66.625   | 1          | KAASTVDFVDEANLKK    | 370      | 0        | 1       |        |
| 60 ENSG0000013790 ENSMUSG0000002283 ENSRG0000000001770 | EHAHAD    | g1942431ref NP_058260.1 | g1942431ref NP_058260.1 | "enoyl-Coenzyme A hydratase-3 (hydratase) Coenzyme A dehy | 71             | 405            | 67       | 722    | 78658 | 9.2 | IRnRnAHM_Mus_Pnc_113,022707.02377.2 | 2 | 4.264 | 0.3084 | 2131.77 | 2152.0 | 1    | 41.66694 | 12         | KLVSTVLEAVFVDEANLKK | 370      | 2        | 1       |        |
| 60 ENSG0000013790 ENSMUSG0000002283 ENSRG0000000001770 | EHAHAD    | g1942431ref NP_058260.1 | g1942431ref NP_058260.1 | "enoyl-Coenzyme A hydratase-3 (hydratase) Coenzyme A dehy | 71             | 405            | 67       | 722    | 78658 | 9.2 | IRnRnAHM_Mus_Pnc_21,009953.00993.2  | 2 | 2.924 | 1.774  | 1034.53 | 1034.8 | 2    | 66.625   | 1          | KAASTVDFVDEANLKK    | 370      | 0        | 1       |        |
| 60 ENSG0000013790 ENSMUSG0000002283 ENSRG0000000001770 | EHAHAD    | g1942431ref NP_058260.1 | g1942431ref NP_058260.1 | "enoyl-Coenzyme A hydratase-3 (hydratase) Coenzyme A dehy | 71             | 405            | 67       | 722    | 78658 | 9.2 | IRnRnAHM_Mus_Pnc_113,022707.02377.2 | 2 | 4.264 | 0.3084 | 2131.77 | 2152.0 | 1    | 41.66694 | 12         | KLVSTVLEAVFVDEANLKK | 370      | 2        | 1       |        |
| 60 ENSG0000013790 ENSMUSG0000002283 ENSRG0000000001770 | EHAHAD    | g1942431ref NP_058260.1 | g1942431ref NP_058260.1 | "enoyl-Coenzyme A hydratase-3 (hydratase) Coenzyme A dehy | 71             | 405            | 67       | 722    | 78658 | 9.2 | IRnRnAHM_Mus_Pnc_21,009953.00993.2  | 2 | 2.924 | 1.774  | 1034.53 | 1034.8 | 2    | 66.625   | 1          | KAASTVDFVDEANLKK    | 370      | 0        | 1       |        |
| 60 ENSG0000013790 ENSMUSG0000002283 ENSRG0000000001770 | EHAHAD    | g1942431ref NP_058260.1 | g1942431ref NP_058260.1 | "enoyl-Coenzyme A hydratase-3 (hydratase) Coenzyme A dehy | 71             | 405            | 67       | 722    | 78658 | 9.2 | IRnRnAHM_Mus_Pnc_113,022707.02377.2 | 2 | 4.264 | 0.3084 | 2131.77 | 2152.0 | 1    | 41.66694 | 12         | KLVSTVLEAVFVDEANLKK | 370      | 2        | 1       |        |
| 60 ENSG0000013790 ENSMUSG0000002283 ENSRG0000000001770 | EHAHAD    | g1942431ref NP_058260.1 | g1942431ref NP_058260.1 | "enoyl-Coenzyme A hydratase-3 (hydratase) Coenzyme A dehy | 71             | 405            | 67       | 722    | 78658 | 9.2 | IRnRnAHM_Mus_Pnc_21,009953.00993.2  | 2 | 2.924 | 1.774  | 1034.53 | 1034.8 | 2    | 66.625   | 1          | KAASTVDFVDEANLKK    | 370      | 0        | 1       |        |
| 60 ENSG0000013790 ENSMUSG0000002                       |           |                         |                         |                                                           |                |                |          |        |       |     |                                     |   |       |        |         |        |      |          |            |                     |          |          |         |        |













| ORTHO_GROUPS |                 |                     | GENE_NAME           | Locus | Proteins in Group      | Description            | Sequence Count | Spectrum Count | Coverage | Length | MW    | pI | MatchID                             | Z      | Xcorr  | DelCn | M+H+  | Calcd | SpRk | Ion | Proportion          | Cont | Sequence | Position | Tryptic | Unique |
|--------------|-----------------|---------------------|---------------------|-------|------------------------|------------------------|----------------|----------------|----------|--------|-------|----|-------------------------------------|--------|--------|-------|-------|-------|------|-----|---------------------|------|----------|----------|---------|--------|
| 76           | ENS000000146992 | ENSMUSG000000009324 | ENSRNOG000000011200 | BHMT  | g13540663refNP_1104771 | g13540663refNP_1104771 | 35             | 236            | 66.6     | 407    | 44876 | 79 | Rn08AaMm_Mus_mus_P_12061037010370.2 | 2.3837 | 0.3807 | 24079 | 24078 | 0     | 47.5 | 1   | RAGSNWATYFVLSDEKNGR | 1    |          | 66       | 27      |        |
| 76           | ENS000000146992 | ENSMUSG000000009324 | ENSRNOG000000011200 | BHMT  | g13540663refNP_1104771 | g13540663refNP_1104771 | 35             | 236            | 66.6     | 407    | 44876 | 79 | Rn08AaMm_Mus_mus_P_12061037010370.2 | 2.3837 | 0.3807 | 24079 | 24078 | 0     | 47.5 | 1   | RAGSNWATYFVLSDEKNGR | 1    |          | 66       | 27      |        |
| 76           | ENS000000146992 | ENSMUSG000000009324 | ENSRNOG000000011200 | BHMT  | g13540663refNP_1104771 | g13540663refNP_1104771 | 35             | 236            | 66.6     | 407    | 44876 | 79 | Rn08AaMm_Mus_mus_P_12061037010370.2 | 2.3837 | 0.3807 | 24079 | 24078 | 0     | 47.5 | 1   | RAGSNWATYFVLSDEKNGR | 1    |          | 66       | 27      |        |
| 76           | ENS000000146992 | ENSMUSG000000009324 | ENSRNOG000000011200 | BHMT  | g13540663refNP_1104771 | g13540663refNP_1104771 | 35             | 236            | 66.6     | 407    | 44876 | 79 | Rn08AaMm_Mus_mus_P_12061037010370.2 | 2.3837 | 0.3807 | 24079 | 24078 | 0     | 47.5 | 1   | RAGSNWATYFVLSDEKNGR | 1    |          | 66       | 27      |        |
| 76           | ENS000000146992 | ENSMUSG000000009324 | ENSRNOG000000011200 | BHMT  | g13540663refNP_1104771 | g13540663refNP_1104771 | 35             | 236            | 66.6     | 407    | 44876 | 79 | Rn08AaMm_Mus_mus_P_12061037010370.2 | 2.3837 | 0.3807 | 24079 | 24078 | 0     | 47.5 | 1   | RAGSNWATYFVLSDEKNGR | 1    |          | 66       | 27      |        |
| 76           | ENS000000146992 | ENSMUSG000000009324 | ENSRNOG000000011200 | BHMT  | g13540663refNP_1104771 | g13540663refNP_1104771 | 35             | 236            | 66.6     | 407    | 44876 | 79 | Rn08AaMm_Mus_mus_P_12061037010370.2 | 2.3837 | 0.3807 | 24079 | 24078 | 0     | 47.5 | 1   | RAGSNWATYFVLSDEKNGR | 1    |          | 66       | 27      |        |
| 76           | ENS000000146992 | ENSMUSG000000009324 | ENSRNOG000000011200 | BHMT  | g13540663refNP_1104771 | g13540663refNP_1104771 | 35             | 236            | 66.6     | 407    | 44876 | 79 | Rn08AaMm_Mus_mus_P_12061037010370.2 | 2.3837 | 0.3807 | 24079 | 24078 | 0     | 47.5 | 1   | RAGSNWATYFVLSDEKNGR | 1    |          | 66       | 27      |        |
| 76           | ENS000000146992 | ENSMUSG000000009324 | ENSRNOG000000011200 | BHMT  | g13540663refNP_1104771 | g13540663refNP_1104771 | 35             | 236            | 66.6     | 407    | 44876 | 79 | Rn08AaMm_Mus_mus_P_12061037010370.2 | 2.3837 | 0.3807 | 24079 | 24078 | 0     | 47.5 | 1   | RAGSNWATYFVLSDEKNGR | 1    |          | 66       | 27      |        |
| 76           | ENS000000146992 | ENSMUSG000000009324 | ENSRNOG000000011200 | BHMT  | g13540663refNP_1104771 | g13540663refNP_1104771 | 35             | 236            | 66.6     | 407    | 44876 | 79 | Rn08AaMm_Mus_mus_P_12061037010370.2 | 2.3837 | 0.3807 | 24079 | 24078 | 0     | 47.5 | 1   | RAGSNWATYFVLSDEKNGR | 1    |          | 66       | 27      |        |
| 76           | ENS000000146992 | ENSMUSG000000009324 | ENSRNOG000000011200 | BHMT  | g13540663refNP_1104771 | g13540663refNP_1104771 | 35             | 236            | 66.6     | 407    | 44876 | 79 | Rn08AaMm_Mus_mus_P_12061037010370.2 | 2.3837 | 0.3807 | 24079 | 24078 | 0     | 47.5 | 1   | RAGSNWATYFVLSDEKNGR | 1    |          | 66       | 27      |        |
| 76           | ENS000000146992 | ENSMUSG000000009324 | ENSRNOG000000011200 | BHMT  | g13540663refNP_1104771 | g13540663refNP_1104771 | 35             | 236            | 66.6     | 407    | 44876 | 79 | Rn08AaMm_Mus_mus_P_12061037010370.2 | 2.3837 | 0.3807 | 24079 | 24078 | 0     | 47.5 | 1   | RAGSNWATYFVLSDEKNGR | 1    |          | 66       | 27      |        |
| 76           | ENS000000146992 | ENSMUSG000000009324 | ENSRNOG000000011200 | BHMT  | g13540663refNP_1104771 | g13540663refNP_1104771 | 35             | 236            | 66.6     | 407    | 44876 | 79 | Rn08AaMm_Mus_mus_P_12061037010370.2 | 2.3837 | 0.3807 | 24079 | 24078 | 0     | 47.5 | 1   | RAGSNWATYFVLSDEKNGR | 1    |          | 66       | 27      |        |
| 76           | ENS000000146992 | ENSMUSG000000009324 | ENSRNOG000000011200 | BHMT  | g13540663refNP_1104771 | g13540663refNP_1104771 | 35             | 236            | 66.6     | 407    | 44876 | 79 | Rn08AaMm_Mus_mus_P_12061037010370.2 | 2.3837 | 0.3807 | 24079 | 24078 | 0     | 47.5 | 1   | RAGSNWATYFVLSDEKNGR | 1    |          | 66       | 27      |        |
| 76           | ENS000000146992 | ENSMUSG000000009324 | ENSRNOG000000011200 | BHMT  | g13540663refNP_1104771 | g13540663refNP_1104771 | 35             | 236            | 66.6     | 407    | 44876 | 79 | Rn08AaMm_Mus_mus_P_12061037010370.2 | 2.3837 | 0.3807 | 24079 | 24078 | 0     | 47.5 | 1   | RAGSNWATYFVLSDEKNGR | 1    |          | 66       | 27      |        |
| 76           | ENS000000146992 | ENSMUSG000000009324 | ENSRNOG000000011200 | BHMT  | g13540663refNP_1104771 | g13540663refNP_1104771 | 35             | 236            | 66.6     | 407    | 44876 | 79 | Rn08AaMm_Mus_mus_P_12061037010370.2 | 2.3837 | 0.3807 | 24079 | 24078 | 0     | 47.5 | 1   | RAGSNWATYFVLSDEKNGR | 1    |          | 66       | 27      |        |
| 76           | ENS000000146992 | ENSMUSG000000009324 | ENSRNOG000000011200 | BHMT  | g13540663refNP_1104771 | g13540663refNP_1104771 | 35             | 236            | 66.6     | 407    | 44876 | 79 | Rn08AaMm_Mus_mus_P_12061037010370.2 | 2.3837 | 0.3807 | 24079 | 24078 | 0     | 47.5 | 1   | RAGSNWATYFVLSDEKNGR | 1    |          | 66       | 27      |        |
| 76           | ENS000000146992 | ENSMUSG000000009324 | ENSRNOG000000011200 | BHMT  | g13540663refNP_1104771 | g13540663refNP_1104771 | 35             | 236            | 66.6     | 407    | 44876 | 79 | Rn08AaMm_Mus_mus_P_12061037010370.2 | 2.3837 | 0.3807 | 24079 | 24078 | 0     | 47.5 | 1   | RAGSNWATYFVLSDEKNGR | 1    |          | 66       | 27      |        |
| 76           | ENS000000146992 | ENSMUSG000000009324 | ENSRNOG000000011200 | BHMT  | g13540663refNP_1104771 | g13540663refNP_1104771 | 35             | 236            | 66.6     | 407    | 44876 | 79 | Rn08AaMm_Mus_mus_P_12061037010370.2 | 2.3837 | 0.3807 | 24079 | 24078 | 0     | 47.5 | 1   | RAGSNWATYFVLSDEKNGR | 1    |          | 66       | 27      |        |
| 76           | ENS000000146992 | ENSMUSG000000009324 | ENSRNOG000000011200 | BHMT  | g13540663refNP_1104771 | g13540663refNP_1104771 | 35             | 236            | 66.6     | 407    | 44876 | 79 | Rn08AaMm_Mus_mus_P_12061037010370.2 | 2.3837 | 0.3807 | 24079 | 24078 | 0     | 47.5 | 1   | RAGSNWATYFVLSDEKNGR | 1    |          | 66       | 27      |        |
| 76           | ENS000000146992 | ENSMUSG000000009324 | ENSRNOG000000011200 | BHMT  | g13540663refNP_1104771 | g13540663refNP_1104771 | 35             | 236            | 66.6     | 407    | 44876 | 79 | Rn08AaMm_Mus_mus_P_12061037010370.2 | 2.3837 | 0.3807 | 24079 | 24078 | 0     | 47.5 | 1   | RAGSNWATYFVLSDEKNGR | 1    |          | 66       | 27      |        |
| 76           | ENS000000146992 | ENSMUSG000000009324 | ENSRNOG000000011200 | BHMT  | g13540663refNP_1104771 | g13540663refNP_1104771 | 35             | 236            | 66.6     | 407    | 44876 | 79 | Rn08AaMm_Mus_mus_P_12061037010370.2 | 2.3837 | 0.3807 | 24079 | 24078 | 0     | 47.5 | 1   | RAGSNWATYFVLSDEKNGR | 1    |          | 66       | 27      |        |
| 76           | ENS000000146992 | ENSMUSG000000009324 | ENSRNOG000000011200 | BHMT  | g13540663refNP_1104771 | g13540663refNP_1104771 | 35             | 236            | 66.6     | 407    | 44876 | 79 | Rn08AaMm_Mus_mus_P_12061037010370.2 | 2.3837 | 0.3807 | 24079 | 24078 | 0     | 47.5 | 1   | RAGSNWATYFVLSDEKNGR | 1    |          | 66       | 27      |        |
| 76           | ENS000000146992 | ENSMUSG000000009324 | ENSRNOG000000011200 | BHMT  | g13540663refNP_1104771 | g13540663refNP_1104771 | 35             | 236            | 66.6     | 407    | 44876 | 79 | Rn08AaMm_Mus_mus_P_12061037010370.2 | 2.3837 | 0.3807 | 24079 | 24078 | 0     | 47.5 | 1   | RAGSNWATYFVLSDEKNGR | 1    |          | 66       | 27      |        |
| 76           | ENS000000146992 | ENSMUSG000000009324 | ENSRNOG000000011200 | BHMT  | g13540663refNP_1104771 | g13540663refNP_1104771 | 35             | 236            | 66.6     | 407    | 44876 | 79 | Rn08AaMm_Mus_mus_P_12061037010370.2 | 2.3837 | 0.3807 | 24079 | 24078 | 0     | 47.5 | 1   | RAGSNWATYFVLSDEKNGR | 1    |          | 66       | 27      |        |
| 76           | ENS000000146992 | ENSMUSG000000009324 | ENSRNOG000000011200 | BHMT  | g13540663refNP_1104771 | g13540663refNP_1104771 | 35             | 236            | 66.6     | 407    | 44876 | 79 | Rn08AaMm_Mus_mus_P_12061037010370.2 | 2.3837 | 0.3807 | 24079 | 24078 | 0     | 47.5 | 1   | RAGSNWATYFVLSDEKNGR | 1    |          | 66       | 27      |        |
| 76           | ENS000000146992 | ENSMUSG000000009324 | ENSRNOG000000011200 | BHMT  | g13540663refNP_1104771 | g13540663refNP_1104771 | 35             | 236            | 66.6     | 407    | 44876 | 79 | Rn08AaMm_Mus_mus_P_12061037010370.2 | 2.3837 | 0.3807 | 24079 | 24078 | 0     | 47.5 | 1   | RAGSNWATYFVLSDEKNGR | 1    |          | 66       | 27      |        |
| 76           | ENS000000146992 | ENSMUSG000000009324 | ENSRNOG000000011200 | BHMT  | g13540663refNP_1104771 | g13540663refNP_1104771 | 35             | 236            | 66.6     | 407    | 44876 | 79 | Rn08AaMm_Mus_mus_P_12061037010370.2 | 2.3837 | 0.3807 | 24079 | 24078 | 0     | 47.5 | 1   | RAGSNWATYFVLSDEKNGR | 1    |          | 66       | 27      |        |
| 76           | ENS000000146992 | ENSMUSG000000009324 | ENSRNOG000000011200 | BHMT  | g13540663refNP_1104771 | g13540663refNP_1104771 | 35             | 236            | 66.6     | 407    | 44876 | 79 | Rn08AaMm_Mus_mus_P_12061037010370.2 | 2.3837 | 0.3807 | 24079 | 24078 | 0     | 47.5 | 1   | RAGSNWATYFVLSDEKNGR | 1    |          | 66       | 27      |        |
| 76           | ENS000000146992 | ENSMUSG000000009324 | ENSRNOG000000011200 | BHMT  | g13540663refNP_1104771 | g13540663refNP_1104771 | 35             | 236            | 66.6     | 407    | 44876 | 79 | Rn08AaMm_Mus_mus_P_12061037010370.2 | 2.3837 | 0.3807 | 24079 | 24078 | 0     | 47.5 | 1   | RAGSNWATYFVLSDEKNGR | 1    |          | 66       | 27      |        |
| 76           | ENS000000146992 | ENSMUSG000000009324 | ENSRNOG000000011200 | BHMT  | g13540663refNP_1104771 | g13540663refNP_1104771 | 35             | 236            | 66.6     | 407    | 44876 | 79 | Rn08AaMm_Mus_mus_P_12061037010370.2 | 2.3837 | 0.3807 | 24079 | 24078 | 0     | 47.5 | 1   | RAGSNWATYFVLSDEKNGR | 1    |          | 66       | 27      |        |
| 76           | ENS000000146992 | ENSMUSG000000009324 | ENSRNOG000000011200 | BHMT  | g13540663refNP_1104771 | g13540663refNP_1104771 | 35             | 236            | 66.6     | 407    | 44876 | 79 | Rn08AaMm_Mus_mus_P_12061037010370.2 | 2.3837 | 0.3807 | 24079 | 24078 | 0     | 47.5 | 1   | RAGSNWATYFVLSDEKNGR | 1    |          | 66       | 27      |        |
| 76           | ENS000000146992 | ENSMUSG000000009324 | ENSRNOG000000011200 | BHMT  | g13540663refNP_1104771 | g13540663refNP_1104771 | 35             | 236            | 66.6     | 407    | 44876 | 79 | Rn08AaMm_Mus_mus_P_12061037010370.2 | 2.3837 | 0.3807 | 24079 | 24078 | 0     | 47.5 | 1   | RAGSNWATYFVLSDEKNGR | 1    |          | 66       | 27      |        |
| 76           | ENS000000146992 | ENSMUSG000000009324 | ENSRNOG000000011200 | BHMT  | g13540663refNP_1104771 | g13540663refNP_1104771 | 35             | 236            | 66.6     | 407    | 44876 | 79 | Rn08AaMm_Mus_mus_P_12061037010370.2 | 2.3837 | 0.3807 | 24079 | 24078 | 0     | 47.5 | 1   | RAGSNWATYFVLSDEKNGR | 1    |          | 66       | 27      |        |
| 76           | ENS000000146992 | ENSMUSG000000009324 | ENSRNOG000000011200 | BHMT  | g13540663refNP_1104771 | g13540663refNP_1104771 | 35             | 236            | 66.6     | 407    | 44876 | 79 | Rn08AaMm_Mus_mus_P_12061037010370.2 | 2.3837 | 0.3807 | 24079 | 24078 | 0     | 47.5 | 1   | RAGSNWATYFVLSDEKNGR | 1    |          | 66       | 27      |        |
| 76           | ENS000000146992 | ENSMUSG000000009324 | ENSRNOG000000011200 | BHMT  | g13540663refNP_1104771 | g13540663refNP_1104771 | 35             | 236            | 66.6     | 407    | 44876 | 79 | Rn08AaMm_Mus_mus_P_12061037010370.2 | 2.3837 | 0.3807 | 24079 | 24078 | 0     | 47.5 | 1   | RAGSNWATYFVLSDEKNGR | 1    |          | 66       | 27      |        |
| 76           | ENS000000146992 | ENSMUSG000000009324 | ENSRNOG000000011200 | BHMT  | g13540663refNP_1104771 | g13540663refNP_1104771 | 35             | 236            | 66.6     | 407    | 44876 | 79 | Rn08AaMm_Mus_mus_P_12061037010370.2 | 2.3837 | 0.3807 | 24079 | 24078 | 0     | 47.5 | 1   | RAGSNWATYFVLSDEKNGR | 1    |          | 66       | 27      |        |
| 76           | ENS000000146992 | ENSMUSG000000009324 | ENSRNOG000000011200 | BHMT  | g13540663refNP_1104771 | g13540663refNP_1104771 | 35             | 236            | 66.6     | 407    | 44876 | 79 | Rn08AaMm_Mus_mus_P_12061037010370.2 | 2.3837 | 0.3807 | 24079 | 24078 | 0     | 47.5 | 1   | RAGSNWATYFVLSDEKNGR | 1    |          | 66       | 27      |        |
| 76           | ENS000000146992 | ENSMUSG000000009324 | ENSRNOG000000011200 | BHMT  | g13540663refNP_1104771 | g13540663refNP_1104771 | 35             | 236            | 66.6     | 407    | 44876 | 79 | Rn08AaMm_Mus_mus_P_12061037010370.2 | 2.3837 | 0.3807 | 24079 | 24078 | 0     | 47.5 | 1   | RAGSNWATYFVLSDEKNGR | 1    |          | 66       | 27      |        |
| 76           | ENS000000146992 | ENSMUSG000000009324 | ENSRNOG000000011200 | BHMT  | g13540663refNP_1104771 | g13540663refNP_1104771 | 35             | 236            | 66.6     | 407    | 44876 | 79 | Rn08AaMm_Mus_mus_P_12061037010370.2 | 2.3837 | 0.3807 | 24079 | 24078 | 0     | 47.5 | 1   | RAGSNWATYFVLSDEKNGR | 1    |          | 66       | 27      |        |



























| ORTHO_GROUPS | GENE_NAME       | Locus              | Proteins In Group | Description         | Sequence Count | Spectrum Count           | Coverage                 | Length                                                    | MW | pI  | MatchID | ZXcore | DeIcn | M+H++ | CalcM                               | Ion | SpPrk | Proton | Con  | Sequence | Position | Sequon | Trypic             | Unique |     |
|--------------|-----------------|--------------------|-------------------|---------------------|----------------|--------------------------|--------------------------|-----------------------------------------------------------|----|-----|---------|--------|-------|-------|-------------------------------------|-----|-------|--------|------|----------|----------|--------|--------------------|--------|-----|
| 105          | ENSG00000186825 | ENSMUSG00000002020 | 15                | ENSRNOG000000019063 | BCAP1          | g15148420[ENP...0104224] | g15148420[ENP...0104224] | B-cell receptor-associated protein 31 [Rattus norvegicus] | 25 | 112 | 50.2    | 245    | 27912 | 89    | RNAseq-HMM_Invt...T_212103742.03242 | 2   | 5.275 | 0.434  | 1887 | 77       | 66.6667  | 4      | K.VNGLNPNPFAHFKHLK | 80     | 2 * |
| 105          | ENSG00000186825 | ENSMUSG00000002020 | 15                | ENSRNOG000000019063 | BCAP1          | g15148420[ENP...0104224] | g15148420[ENP...0104224] | B-cell receptor-associated protein 31 [Rattus norvegicus] | 25 | 112 | 50.2    | 245    | 27912 | 89    | RNAseq-HMM_Invt...T_212103742.03242 | 2   | 5.275 | 0.434  | 1887 | 77       | 66.6667  | 4      | K.VNGLNPNPFAHFKHLK | 80     | 2 * |
| 105          | ENSG00000186825 | ENSMUSG00000002020 | 15                | ENSRNOG000000019063 | BCAP1          | g15148420[ENP...0104224] | g15148420[ENP...0104224] | B-cell receptor-associated protein 31 [Rattus norvegicus] | 25 | 112 | 50.2    | 245    | 27912 | 89    | RNAseq-HMM_Invt...T_212103742.03242 | 2   | 5.275 | 0.434  | 1887 | 77       | 66.6667  | 4      | K.VNGLNPNPFAHFKHLK | 80     | 2 * |
| 105          | ENSG00000186825 | ENSMUSG00000002020 | 15                | ENSRNOG000000019063 | BCAP1          | g15148420[ENP...0104224] | g15148420[ENP...0104224] | B-cell receptor-associated protein 31 [Rattus norvegicus] | 25 | 112 | 50.2    | 245    | 27912 | 89    | RNAseq-HMM_Invt...T_212103742.03242 | 2   | 5.275 | 0.434  | 1887 | 77       | 66.6667  | 4      | K.VNGLNPNPFAHFKHLK | 80     | 2 * |
| 105          | ENSG00000186825 | ENSMUSG00000002020 | 15                | ENSRNOG000000019063 | BCAP1          | g15148420[ENP...0104224] | g15148420[ENP...0104224] | B-cell receptor-associated protein 31 [Rattus norvegicus] | 25 | 112 | 50.2    | 245    | 27912 | 89    | RNAseq-HMM_Invt...T_212103742.03242 | 2   | 5.275 | 0.434  | 1887 | 77       | 66.6667  | 4      | K.VNGLNPNPFAHFKHLK | 80     | 2 * |
| 105          | ENSG00000186825 | ENSMUSG00000002020 | 15                | ENSRNOG000000019063 | BCAP1          | g15148420[ENP...0104224] | g15148420[ENP...0104224] | B-cell receptor-associated protein 31 [Rattus norvegicus] | 25 | 112 | 50.2    | 245    | 27912 | 89    | RNAseq-HMM_Invt...T_212103742.03242 | 2   | 5.275 | 0.434  | 1887 | 77       | 66.6667  | 4      | K.VNGLNPNPFAHFKHLK | 80     | 2 * |
| 105          | ENSG00000186825 | ENSMUSG00000002020 | 15                | ENSRNOG000000019063 | BCAP1          | g15148420[ENP...0104224] | g15148420[ENP...0104224] | B-cell receptor-associated protein 31 [Rattus norvegicus] | 25 | 112 | 50.2    | 245    | 27912 | 89    | RNAseq-HMM_Invt...T_212103742.03242 | 2   | 5.275 | 0.434  | 1887 | 77       | 66.6667  | 4      | K.VNGLNPNPFAHFKHLK | 80     | 2 * |
| 105          | ENSG00000186825 | ENSMUSG00000002020 | 15                | ENSRNOG000000019063 | BCAP1          | g15148420[ENP...0104224] | g15148420[ENP...0104224] | B-cell receptor-associated protein 31 [Rattus norvegicus] | 25 | 112 | 50.2    | 245    | 27912 | 89    | RNAseq-HMM_Invt...T_212103742.03242 | 2   | 5.275 | 0.434  | 1887 | 77       | 66.6667  | 4      | K.VNGLNPNPFAHFKHLK | 80     | 2 * |
| 105          | ENSG00000186825 | ENSMUSG00000002020 | 15                | ENSRNOG000000019063 | BCAP1          | g15148420[ENP...0104224] | g15148420[ENP...0104224] | B-cell receptor-associated protein 31 [Rattus norvegicus] | 25 | 112 | 50.2    | 245    | 27912 | 89    | RNAseq-HMM_Invt...T_212103742.03242 | 2   | 5.275 | 0.434  | 1887 | 77       | 66.6667  | 4      | K.VNGLNPNPFAHFKHLK | 80     | 2 * |
| 105          | ENSG00000186825 | ENSMUSG00000002020 | 15                | ENSRNOG000000019063 | BCAP1          | g15148420[ENP...0104224] | g15148420[ENP...0104224] | B-cell receptor-associated protein 31 [Rattus norvegicus] | 25 | 112 | 50.2    | 245    | 27912 | 89    | RNAseq-HMM_Invt...T_212103742.03242 | 2   | 5.275 | 0.434  | 1887 | 77       | 66.6667  | 4      | K.VNGLNPNPFAHFKHLK | 80     | 2 * |
| 105          | ENSG00000186825 | ENSMUSG00000002020 | 15                | ENSRNOG000000019063 | BCAP1          | g15148420[ENP...0104224] | g15148420[ENP...0104224] | B-cell receptor-associated protein 31 [Rattus norvegicus] | 25 | 112 | 50.2    | 245    | 27912 | 89    | RNAseq-HMM_Invt...T_212103742.03242 | 2   | 5.275 | 0.434  | 1887 | 77       | 66.6667  | 4      | K.VNGLNPNPFAHFKHLK | 80     | 2 * |
| 105          | ENSG00000186825 | ENSMUSG00000002020 | 15                | ENSRNOG000000019063 | BCAP1          | g15148420[ENP...0104224] | g15148420[ENP...0104224] | B-cell receptor-associated protein 31 [Rattus norvegicus] | 25 | 112 | 50.2    | 245    | 27912 | 89    | RNAseq-HMM_Invt...T_212103742.03242 | 2   | 5.275 | 0.434  | 1887 | 77       | 66.6667  | 4      | K.VNGLNPNPFAHFKHLK | 80     | 2 * |
| 105          | ENSG00000186825 | ENSMUSG00000002020 | 15</              |                     |                |                          |                          |                                                           |    |     |         |        |       |       |                                     |     |       |        |      |          |          |        |                    |        |     |





















| ORF | ORF_GROUPS      | GENE_NAME          | Locus              | Proteins in Group | Description            | Sequence Count         | Spectrum Count | Coverage | Length | MW  | pI    | MatchID                              | Z | Xcorr | DeNov  | MHH+    | CalcI  | SpKR | Ion      | Proportion | Count            | Sequence | Position | Tryptic | Unique |
|-----|-----------------|--------------------|--------------------|-------------------|------------------------|------------------------|----------------|----------|--------|-----|-------|--------------------------------------|---|-------|--------|---------|--------|------|----------|------------|------------------|----------|----------|---------|--------|
| 138 | ENSG00000170171 | ENSMUSG00000022826 | ENSRNOG00000001869 | ALCAM             | g1302605refNP_133441.1 | g1302605refNP_133441.1 | 34             | 209      | 441    | 583 | 55022 | 6 RoRnAA-MuH_VH_1,41.018066.018042.2 | 2 | 3.769 | 0.1081 | 1543.71 | 1542.8 | 20   | 70.83333 | 8          | K VFKVQSPSPFNKVA | 130      | 2        |         |        |
| 139 | ENSG00000170171 | ENSMUSG00000022826 | ENSRNOG00000001869 | ALCAM             | g1302605refNP_133441.1 | g1302605refNP_133441.1 | 34             | 209      | 441    | 583 | 55022 | 6 RoRnAA-MuH_VH_1,41.018066.018042.2 | 2 | 3.769 | 0.1081 | 1543.71 | 1542.8 | 20   | 70.83333 | 8          | K VFKVQSPSPFNKVA | 130      | 2        |         |        |
| 140 | ENSG00000170171 | ENSMUSG00000022826 | ENSRNOG00000001869 | ALCAM             | g1302605refNP_133441.1 | g1302605refNP_133441.1 | 34             | 209      | 441    | 583 | 55022 | 6 RoRnAA-MuH_VH_1,41.018066.018042.2 | 2 | 3.769 | 0.1081 | 1543.71 | 1542.8 | 20   | 70.83333 | 8          | K VFKVQSPSPFNKVA | 130      | 2        |         |        |
| 141 | ENSG00000170171 | ENSMUSG00000022826 | ENSRNOG00000001869 | ALCAM             | g1302605refNP_133441.1 | g1302605refNP_133441.1 | 34             | 209      | 441    | 583 | 55022 | 6 RoRnAA-MuH_VH_1,41.018066.018042.2 | 2 | 3.769 | 0.1081 | 1543.71 | 1542.8 | 20   | 70.83333 | 8          | K VFKVQSPSPFNKVA | 130      | 2        |         |        |
| 142 | ENSG00000170171 | ENSMUSG00000022826 | ENSRNOG00000001869 | ALCAM             | g1302605refNP_133441.1 | g1302605refNP_133441.1 | 34             | 209      | 441    | 583 | 55022 | 6 RoRnAA-MuH_VH_1,41.018066.018042.2 | 2 | 3.769 | 0.1081 | 1543.71 | 1542.8 | 20   | 70.83333 | 8          | K VFKVQSPSPFNKVA | 130      | 2        |         |        |
| 143 | ENSG00000170171 | ENSMUSG00000022826 | ENSRNOG00000001869 | ALCAM             | g1302605refNP_133441.1 | g1302605refNP_133441.1 | 34             | 209      | 441    | 583 | 55022 | 6 RoRnAA-MuH_VH_1,41.018066.018042.2 | 2 | 3.769 | 0.1081 | 1543.71 | 1542.8 | 20   | 70.83333 | 8          | K VFKVQSPSPFNKVA | 130      | 2        |         |        |
| 144 | ENSG00000170171 | ENSMUSG00000022826 | ENSRNOG00000001869 | ALCAM             | g1302605refNP_133441.1 | g1302605refNP_133441.1 | 34             | 209      | 441    | 583 | 55022 | 6 RoRnAA-MuH_VH_1,41.018066.018042.2 | 2 | 3.769 | 0.1081 | 1543.71 | 1542.8 | 20   | 70.83333 | 8          | K VFKVQSPSPFNKVA | 130      | 2        |         |        |
| 145 | ENSG00000170171 | ENSMUSG00000022826 | ENSRNOG00000001869 | ALCAM             | g1302605refNP_133441.1 | g1302605refNP_133441.1 | 34             | 209      | 441    | 583 | 55022 | 6 RoRnAA-MuH_VH_1,41.018066.018042.2 | 2 | 3.769 | 0.1081 | 1543.71 | 1542.8 | 20   | 70.83333 | 8          | K VFKVQSPSPFNKVA | 130      | 2        |         |        |
| 146 | ENSG00000170171 | ENSMUSG00000022826 | ENSRNOG00000001869 | ALCAM             | g1302605refNP_133441.1 | g1302605refNP_133441.1 | 34             | 209      | 441    | 583 | 55022 | 6 RoRnAA-MuH_VH_1,41.018066.018042.2 | 2 | 3.769 | 0.1081 | 1543.71 | 1542.8 | 20   | 70.83333 | 8          | K VFKVQSPSPFNKVA | 130      | 2        |         |        |
| 147 | ENSG00000170171 | ENSMUSG00000022826 | ENSRNOG00000001869 | ALCAM             | g1302605refNP_133441.1 | g1302605refNP_133441.1 | 34             | 209      | 441    | 583 | 55022 | 6 RoRnAA-MuH_VH_1,41.018066.018042.2 | 2 | 3.769 | 0.1081 | 1543.71 | 1542.8 | 20   | 70.83333 | 8          | K VFKVQSPSPFNKVA | 130      | 2        |         |        |
| 148 | ENSG00000170171 | ENSMUSG00000022826 | ENSRNOG00000001869 | ALCAM             | g1302605refNP_133441.1 | g1302605refNP_133441.1 | 34             | 209      | 441    | 583 | 55022 | 6 RoRnAA-MuH_VH_1,41.018066.018042.2 | 2 | 3.769 | 0.1081 | 1543.71 | 1542.8 | 20   | 70.83333 | 8          | K VFKVQSPSPFNKVA | 130      | 2        |         |        |
| 149 | ENSG00000170171 | ENSMUSG00000022826 | ENSRNOG00000001869 | ALCAM             | g1302605refNP_133441.1 | g1302605refNP_133441.1 | 34             | 209      | 441    | 583 | 55022 | 6 RoRnAA-MuH_VH_1,41.018066.018042.2 | 2 | 3.769 | 0.1081 | 1543.71 | 1542.8 | 20   | 70.83333 | 8          | K VFKVQSPSPFNKVA | 130      | 2        |         |        |
| 150 | ENSG00000170171 | ENSMUSG00000022826 | ENSRNOG00000001869 | ALCAM             | g1302605refNP_133441.1 | g1302605refNP_133441.1 | 34             | 209      | 441    | 58  |       |                                      |   |       |        |         |        |      |          |            |                  |          |          |         |        |





| ORTHO_GROUPS                                             | GENE_NAME | Locus                    | Proteins in Group        | Description                                             | Sequence Count | Spectrum Count | Coverage | Length | MW   | pI  | MatchID                           | Z | Xcorr  | DelCN   | M+H+ | Cal+M | SpRk | Ion | Proportion           | Count | Sequence | Position | Tryptic | Unique |
|----------------------------------------------------------|-----------|--------------------------|--------------------------|---------------------------------------------------------|----------------|----------------|----------|--------|------|-----|-----------------------------------|---|--------|---------|------|-------|------|-----|----------------------|-------|----------|----------|---------|--------|
| 146 ENSG00000209702:ENSMUSG00000008808:ENSRNOG0000000128 | CPY2P071  | g127453743qnpF_T754261.1 | g127453743qnpF_T754261.1 | "cytochrome P450, family 2, subfamily 1, polypeptide 10 | 110            | 814            | 80.8     | 504    | 5070 | 6.8 | R6NR8AMH_MMU_Pnc_10704852:09842.3 | 3 | 3.8227 | 0.171   | 1255 | 1924  | 0.5  | 1   | 0.4AMPPYNNVHVE       | 354   | 0        |          |         |        |
| 146 ENSG00000209702:ENSMUSG00000008808:ENSRNOG0000000128 | CPY2P071  | g127453743qnpF_T754261.1 | g127453743qnpF_T754261.1 | "cytochrome P450, family 2, subfamily 1, polypeptide 10 | 110            | 814            | 80.8     | 504    | 5070 | 6.8 | R6NR8AMH_MMU_Pnc_12140688:01042.1 | 3 | 3.8275 | 0.104   | 1025 | 1704  | 0.2  | 1   | 1KWTYRPPYPPVPPVLLN   | 32    | 1        |          |         |        |
| 146 ENSG00000209702:ENSMUSG00000008808:ENSRNOG0000000128 | CPY2P071  | g127453743qnpF_T754261.1 | g127453743qnpF_T754261.1 | "cytochrome P450, family 2, subfamily 1, polypeptide 10 | 110            | 814            | 80.8     | 504    | 5070 | 6.8 | R6NR8AMH_MMU_Pnc_11012274:01274.2 | 2 | 2.772  | 0.270   | 1241 | 2124  | 0.7  | 1   | 1F2F87878787878787   | 32    | 1        |          |         |        |
| 146 ENSG00000209702:ENSMUSG00000008808:ENSRNOG0000000128 | CPY2P071  | g127453743qnpF_T754261.1 | g127453743qnpF_T754261.1 | "cytochrome P450, family 2, subfamily 1, polypeptide 10 | 110            | 814            | 80.8     | 504    | 5070 | 6.8 | R6NR8AMH_MMU_Pnc_12010974:01042.4 | 2 | 2.713  | 0.445   | 1075 | 1875  | 0.9  | 1   | 1G278787878787878787 | 37    | 1        |          |         |        |
| 146 ENSG00000209702:ENSMUSG00000008808:ENSRNOG0000000128 | CPY2P071  | g127453743qnpF_T754261.1 | g127453743qnpF_T754261.1 | "cytochrome P450, family 2, subfamily 1, polypeptide 10 | 110            | 814            | 80.8     | 504    | 5070 | 6.8 | R6NR8AMH_MMU_Pnc_12010974:01042.4 | 2 | 2.713  | 0.445   | 1075 | 1875  | 0.9  | 1   | 1G278787878787878787 | 37    | 1        |          |         |        |
| 146 ENSG00000209702:ENSMUSG00000008808:ENSRNOG0000000128 | CPY2P071  | g127453743qnpF_T754261.1 | g127453743qnpF_T754261.1 | "cytochrome P450, family 2, subfamily 1, polypeptide 10 | 110            | 814            | 80.8     | 504    | 5070 | 6.8 | R6NR8AMH_MMU_Pnc_12010974:01042.4 | 2 | 2.713  | 0.445   | 1075 | 1875  | 0.9  | 1   | 1G278787878787878787 | 37    | 1        |          |         |        |
| 146 ENSG00000209702:ENSMUSG00000008808:ENSRNOG0000000128 | CPY2P071  | g127453743qnpF_T754261.1 | g127453743qnpF_T754261.1 | "cytochrome P450, family 2, subfamily 1, polypeptide 10 | 110            | 814            | 80.8     | 504    | 5070 | 6.8 | R6NR8AMH_MMU_Pnc_12010974:01042.4 | 2 | 2.713  | 0.445   | 1075 | 1875  | 0.9  | 1   | 1G278787878787878787 | 37    | 1        |          |         |        |
| 146 ENSG00000209702:ENSMUSG00000008808:ENSRNOG0000000128 | CPY2P071  | g127453743qnpF_T754261.1 | g127453743qnpF_T754261.1 | "cytochrome P450, family 2, subfamily 1, polypeptide 10 | 110            | 814            | 80.8     | 504    | 5070 | 6.8 | R6NR8AMH_MMU_Pnc_12010974:01042.4 | 2 | 2.713  | 0.445   | 1075 | 1875  | 0.9  | 1   | 1G278787878787878787 | 37    | 1        |          |         |        |
| 146 ENSG00000209702:ENSMUSG00000008808:ENSRNOG0000000128 | CPY2P071  | g127453743qnpF_T754261.1 | g127453743qnpF_T754261.1 | "cytochrome P450, family 2, subfamily 1, polypeptide 10 | 110            | 814            | 80.8     | 504    | 5070 | 6.8 | R6NR8AMH_MMU_Pnc_12010974:01042.4 | 2 | 2.713  | 0.445   | 1075 | 1875  | 0.9  | 1   | 1G278787878787878787 | 37    | 1        |          |         |        |
| 146 ENSG00000209702:ENSMUSG00000008808:ENSRNOG0000000128 | CPY2P071  | g127453743qnpF_T754261.1 | g127453743qnpF_T754261.1 | "cytochrome P450, family 2, subfamily 1, polypeptide 10 | 110            | 814            | 80.8     | 504    | 5070 | 6.8 | R6NR8AMH_MMU_Pnc_12010974:01042.4 | 2 | 2.713  | 0.445   | 1075 | 1875  | 0.9  | 1   | 1G278787878787878787 | 37    | 1        |          |         |        |
| 146 ENSG00000209702:ENSMUSG00000008808:ENSRNOG0000000128 | CPY2P071  | g127453743qnpF_T754261.1 | g127453743qnpF_T754261.1 | "cytochrome P450, family 2, subfamily 1, polypeptide 10 | 110            | 814            | 80.8     | 504    | 5070 | 6.8 | R6NR8AMH_MMU_Pnc_12010974:01042.4 | 2 | 2.713  | 0.445   | 1075 | 1875  | 0.9  | 1   | 1G278787878787878787 | 37    | 1        |          |         |        |
| 146 ENSG00000209702:ENSMUSG00000008808:ENSRNOG0000000128 | CPY2P071  | g127453743qnpF_T754261.1 | g127453743qnpF_T754261.1 | "cytochrome P450, family 2, subfamily 1, polypeptide 10 | 110            | 814            | 80.8     | 504    | 5070 | 6.8 | R6NR8AMH_MMU_Pnc_12010974:01042.4 | 2 | 2.713  | 0.445</ |      |       |      |     |                      |       |          |          |         |        |

















































122













| rk  | ORTHO_GROUPS                                          | GENE_NAME | Locus                    | Proteins in Group        | Description                                                           | Sequence Count | Spectrum Count | Coverage | Length | MW     | pI  | MatchID                         | Z XCORR | DeIDCN | M+H+    | CaIcM | Ion | SPKR | Protein                      | Count | Sequence | Sequence Position | Tryptic | Unique |
|-----|-------------------------------------------------------|-----------|--------------------------|--------------------------|-----------------------------------------------------------------------|----------------|----------------|----------|--------|--------|-----|---------------------------------|---------|--------|---------|-------|-----|------|------------------------------|-------|----------|-------------------|---------|--------|
| 252 | ENSG0000021826:ENSMUSG00000025991:ENSRNOG000000013704 | CP51      | g183301869:efnf_056768.1 | g183301869:efnf_056768.1 | "carbamoyl-phosphate synthetase 1, mitochondrial [Rattus norvegicus]" | 51             | 222            | 41.7     | 1500   | 164579 | 6.8 | RN88ACMH_MW_12061016789.0101692 | 2.778   | 0.2714 | 2648.31 | 2648  | 1   | 37.5 | 1 KAEPRGLDQGVGGQTLNAGLWELKTR | 1478  | 2 *      |                   |         |        |
| 253 | ENSG0000021826:ENSMUSG00000025991:ENSRNOG000000013704 | CP51      | g183301869:efnf_056768.1 | g183301869:efnf_056768.1 | "carbamoyl-phosphate synthetase 1, mitochondrial [Rattus norvegicus]" | 51             | 222            | 41.7     | 1500   | 164579 | 6.8 | RN88ACMH_MW_12061016789.0101692 | 2.778   | 0.2714 | 2648.31 | 2648  | 1   | 37.5 | 1 KAEPRGLDQGVGGQTLNAGLWELKTR | 1478  | 2 *      |                   |         |        |
| 254 | ENSG0000021826:ENSMUSG00000025991:ENSRNOG000000013704 | CP51      | g183301869:efnf_056768.1 | g183301869:efnf_056768.1 | "carbamoyl-phosphate synthetase 1, mitochondrial [Rattus norvegicus]" | 51             | 222            | 41.7     | 1500   | 164579 | 6.8 | RN88ACMH_MW_12061016789.0101692 | 2.778   | 0.2714 | 2648.31 | 2648  | 1   | 37.5 | 1 KAEPRGLDQGVGGQTLNAGLWELKTR | 1478  | 2 *      |                   |         |        |
| 255 | ENSG0000021826:ENSMUSG00000025991:ENSRNOG000000013704 | CP51      | g183301869:efnf_056768.1 | g183301869:efnf_056768.1 | "carbamoyl-phosphate synthetase 1, mitochondrial [Rattus norvegicus]" | 51             | 222            | 41.7     | 1500   | 164579 | 6.8 | RN88ACMH_MW_12061016789.0101692 | 2.778   | 0.2714 | 2648.31 | 2648  | 1   | 37.5 | 1 KAEPRGLDQGVGGQTLNAGLWELKTR | 1478  | 2 *      |                   |         |        |
| 256 | ENSG0000021826:ENSMUSG00000025991:ENSRNOG000000013704 | CP51      | g183301869:efnf_056768.1 | g183301869:efnf_056768.1 | "carbamoyl-phosphate synthetase 1, mitochondrial [Rattus norvegicus]" | 51             | 222            | 41.7     | 1500   | 164579 | 6.8 | RN88ACMH_MW_12061016789.0101692 | 2.778   | 0.2714 | 2648.31 | 2648  | 1   | 37.5 | 1 KAEPRGLDQGVGGQTLNAGLWELKTR | 1478  | 2 *      |                   |         |        |
| 257 | ENSG0000021826:ENSMUSG00000025991:ENSRNOG000000013704 | CP51      | g183301869:efnf_056768.1 | g183301869:efnf_056768.1 | "carbamoyl-phosphate synthetase 1, mitochondrial [Rattus norvegicus]" | 51             | 222            | 41.7     | 1500   | 164579 | 6.8 | RN88ACMH_MW_12061016789.0101692 | 2.778   | 0.2714 | 2648.31 | 2648  | 1   | 37.5 | 1 KAEPRGLDQGVGGQTLNAGLWELKTR | 1478  | 2 *      |                   |         |        |
| 258 | ENSG0000021826:ENSMUSG00000025991:ENSRNOG000000013704 | CP51      | g183301869:efnf_056768.1 | g183301869:efnf_056768.1 | "carbamoyl-phosphate synthetase 1, mitochondrial [Rattus norvegicus]" | 51             | 222            | 41.7     | 1500   | 164579 | 6.8 | RN88ACMH_MW_12061016789.0101692 | 2.778   | 0.2714 | 2648.31 | 2648  | 1   | 37.5 | 1 KAEPRGLDQGVGGQTLNAGLWELKTR | 1478  | 2 *      |                   |         |        |
| 259 | ENSG0000021826:ENSMUSG00000025991:ENSRNOG000000013704 | CP51      | g183301869:efnf_056768.1 | g183301869:efnf_056768.1 | "carbamoyl-phosphate synthetase 1, mitochondrial [Rattus norvegicus]" | 51             | 222            | 41.7     | 1500   | 164579 | 6.8 | RN88ACMH_MW_12061016789.0101692 | 2.778   | 0.2714 | 2648.31 | 2648  | 1   | 37.5 | 1 KAEPRGLDQGVGGQTLNAGLWELKTR | 1478  | 2 *      |                   |         |        |
| 260 | ENSG0000021826:ENSMUSG00000025991:ENSRNOG000000013704 | CP51      | g183301869:efnf_056768.1 | g183301869:efnf_056768.1 | "carbamoyl-phosphate synthetase 1, mitochondrial [Rattus norvegicus]" | 51             | 222            | 41.7     | 1500   | 164579 | 6.8 | RN88ACMH_MW_12061016789.0101692 | 2.778   | 0.2714 | 2648.31 | 2648  | 1   | 37.5 | 1 KAEPRGLDQGVGGQTLNAGLWELKTR | 1478  | 2 *      |                   |         |        |
| 261 | ENSG0000021826:ENSMUSG00000025991:ENSRNOG000000013704 | CP51      | g183301869:efnf_056768.1 | g183301869:efnf_056768.1 | "carbamoyl-phosphate synthetase 1, mitochondrial [Rattus norvegicus]" | 51             | 222            | 41.7     | 1500   | 164579 | 6.8 | RN88ACMH_MW_12061016789.0101692 | 2.778   | 0.2714 | 2648.31 | 2648  | 1   | 37.5 | 1 KAEPRGLDQGVGGQTLNAGLWELKTR | 1478  | 2 *      |                   |         |        |
| 262 | ENSG0000021826:ENSMUSG00000025991:ENSRNOG000000013704 | CP51      | g183301869:efnf_056768.1 | g183301869:efnf_056768.1 | "carbamoyl-phosphate synthetase 1, mitochondrial [Rattus norvegicus]" | 51             | 222            | 41.7     | 1500   | 164579 | 6.8 | RN88ACMH_MW_12061016789.0101692 | 2.778   | 0.2714 | 2648.31 | 2648  | 1   | 37.5 | 1 KAEPRGLDQGVGGQTLNAGLWELKTR | 1478  | 2 *      |                   |         |        |
| 263 | ENSG0000021826:ENSMUSG00000025991:ENSRNOG000000013704 | CP51      | g183301869:efnf_056768.1 | g183301869:efnf_056768.1 | "carbamoyl-phosphate synthetase 1, mitochondrial [Rattus norvegicus]" | 51             | 222            | 41.7     | 1500   | 164579 | 6.8 | RN88ACMH_MW_12061016789.0101692 | 2.778   | 0.2714 | 2648.31 | 2648  | 1   | 37.5 | 1 KAEPRGLDQ                  |       |          |                   |         |        |

[illegible]

131

















| chr | ORF_GROUPS      | GENE_NAME           | Locus              | Proteins in Group | Description            | Sequence Count                     | Spectrum Count | Coverage | Length | MM   | PI    | MatchID | Z                                  | XCorr | DelTCN | M+H    | CalCm | Ion   | Proton | Count   | Sequence | Position         | Type |  |
|-----|-----------------|---------------------|--------------------|-------------------|------------------------|------------------------------------|----------------|----------|--------|------|-------|---------|------------------------------------|-------|--------|--------|-------|-------|--------|---------|----------|------------------|------|--|
| 31  | ENSG00000244757 | ENSMUSG000000030817 | ENSRNG000000011913 | CP                | g10766959@ref_006664.1 | celastrolipase (Rattus norvegicus) | 13             | 51       | 14.4   | 1059 | 12841 | 5.8     | RhNoAMH-MH_Iwv_Pc_112,01751.013712 | 2     | 3.828  | 0.2145 | 164.3 | 164.3 | 1      | 65.3841 | 1        | T FNNHGGPILPSQIA | 344  |  |
| 31  | ENSG00000244757 | ENSMUSG000000030817 | ENSRNG000000011913 | CP                | g10766959@ref_006664.1 | celastrolipase (Rattus norvegicus) | 13             | 51       | 14.4   | 1059 | 12841 | 5.8     | RhNoAMH-MH_Iwv_Pc_112,01751.013712 | 2     | 3.828  | 0.2145 | 164.3 | 164.3 | 1      | 65.3841 | 1        | T FNNHGGPILPSQIA | 344  |  |
| 31  | ENSG00000244757 | ENSMUSG000000030817 | ENSRNG000000011913 | CP                | g10766959@ref_006664.1 | celastrolipase (Rattus norvegicus) | 13             | 51       | 14.4   | 1059 | 12841 | 5.8     | RhNoAMH-MH_Iwv_Pc_112,01751.013712 | 2     | 3.828  | 0.2145 | 164.3 | 164.3 | 1      | 65.3841 | 1        | T FNNHGGPILPSQIA | 344  |  |
| 31  | ENSG00000244757 | ENSMUSG000000030817 | ENSRNG000000011913 | CP                | g10766959@ref_006664.1 | celastrolipase (Rattus norvegicus) | 13             | 51       | 14.4   | 1059 | 12841 | 5.8     | RhNoAMH-MH_Iwv_Pc_112,01751.013712 | 2     | 3.828  | 0.2145 | 164.3 | 164.3 | 1      | 65.3841 | 1        | T FNNHGGPILPSQIA | 344  |  |
| 31  | ENSG00000244757 | ENSMUSG000000030817 | ENSRNG000000011913 | CP                | g10766959@ref_006664.1 | celastrolipase (Rattus norvegicus) | 13             | 51       | 14.4   | 1059 | 12841 | 5.8     | RhNoAMH-MH_Iwv_Pc_112,01751.013712 | 2     | 3.828  | 0.2145 | 164.3 | 164.3 | 1      | 65.3841 | 1        | T FNNHGGPILPSQIA | 344  |  |
| 31  | ENSG00000244757 | ENSMUSG000000030817 | ENSRNG000000011913 | CP                | g10766959@ref_006664.1 | celastrolipase (Rattus norvegicus) | 13             | 51       | 14.4   | 1059 | 12841 | 5.8     | RhNoAMH-MH_Iwv_Pc_112,01751.013712 | 2     | 3.828  | 0.2145 | 164.3 | 164.3 | 1      | 65.3841 | 1        | T FNNHGGPILPSQIA | 344  |  |
| 31  | ENSG00000244757 | ENSMUSG000000030817 | ENSRNG000000011913 | CP                | g10766959@ref_006664.1 | celastrolipase (Rattus norvegicus) | 13             | 51       | 14.4   | 1059 | 12841 | 5.8     | RhNoAMH-MH_Iwv_Pc_112,01751.013712 | 2     | 3.828  | 0.2145 | 164.3 | 164.3 | 1      | 65.3841 | 1        | T FNNHGGPILPSQIA | 344  |  |
| 31  | ENSG00000244757 | ENSMUSG000000030817 | ENSRNG000000011913 | CP                | g10766959@ref_006664.1 | celastrolipase (Rattus norvegicus) | 13             | 51       | 14.4   | 1059 | 12841 | 5.8     | RhNoAMH-MH_Iwv_Pc_112,01751.013712 | 2     | 3.828  | 0.2145 | 164.3 | 164.3 | 1      | 65.3841 | 1        | T FNNHGGPILPSQIA | 344  |  |
| 31  | ENSG00000244757 | ENSMUSG000000030817 | ENSRNG000000011913 | CP                | g10766959@ref_006664.1 | celastrolipase (Rattus norvegicus) | 13             | 51       | 14.4   | 1059 | 12841 | 5.8     | RhNoAMH-MH_Iwv_Pc_112,01751.013712 | 2     | 3.828  | 0.2145 | 164.3 | 164.3 | 1      | 65.3841 | 1        | T FNNHGGPILPSQIA | 344  |  |
| 31  | ENSG00000244757 | ENSMUSG000000030817 | ENSRNG000000011913 | CP                | g10766959@ref_006664.1 | celastrolipase (Rattus norvegicus) | 13             | 51       | 14.4   | 1059 | 12841 | 5.8     | RhNoAMH-MH_Iwv_Pc_112,01751.013712 | 2     | 3.828  | 0.2145 | 164.3 | 164.3 | 1      | 65.3841 | 1        | T FNNHGGPILPSQIA | 344  |  |
| 31  | ENSG00000244757 | ENSMUSG000000030817 | ENSRNG000000011913 | CP                | g10766959@ref_006664.1 | celastrolipase (Rattus norvegicus) | 13             | 51       | 14.4   | 1059 | 12841 | 5.8     | RhNoAMH-MH_Iwv_Pc_112,01751.013712 | 2     | 3.828  | 0.2145 | 164.3 | 164.3 | 1      | 65.3841 | 1        | T FNNHGGPILPSQIA | 344  |  |
| 31  | ENSG00000244757 | ENSMUSG000000030817 | ENSRNG000000011913 | CP                | g10766959@ref_006664.1 | celastrolipase (Rattus norvegicus) | 13             | 51       | 14.4   | 1059 | 12841 | 5.8     | RhNoAMH-MH_Iwv_Pc_112,01751.013712 | 2     | 3.828  | 0.2145 | 164.3 | 164.3 | 1      | 65.3841 | 1        | T FNNHGGPILPSQIA | 344  |  |
| 31  | ENSG00000244757 | ENSMUSG000000030817 | ENSRNG000000011913 | CP                | g10766959@ref_006664.1 | celastrolipase (Rattus norvegicus) | 13             | 51       | 14.4   | 1059 | 12841 | 5.8     | RhNoAMH-MH_Iwv_Pc_112,01751.013712 | 2     | 3.828  | 0.2145 | 164.3 | 164.3 | 1      | 65.3841 | 1        | T FNNHGGPILPSQIA | 344  |  |
| 31  | ENSG00000244757 | ENSMUSG000000030817 | ENSRNG000          |                   |                        |                                    |                |          |        |      |       |         |                                    |       |        |        |       |       |        |         |          |                  |      |  |















[illegible]





151



















161

























174











180



















| rk | ORGANISMS       | GENE_NAME          | LOCUS              | Proteins in Group | Description              | Sequence Count | Spectrum Count | Coverage | Length | MW    | pI   | MatchID | Z   | Xcorr         | Decom | MH++   | Calc   | Ion  | SPRK | Protein | Count            | Sequence | Position | Tryptic | Unique |
|----|-----------------|--------------------|--------------------|-------------------|--------------------------|----------------|----------------|----------|--------|-------|------|---------|-----|---------------|-------|--------|--------|------|------|---------|------------------|----------|----------|---------|--------|
| 83 | ENSINO000001573 | ENSMUSG00000002234 | ENSMUSG00000011632 | CTC5              | g11802147refNP_0104078.1 | 5              | 20             | 15.2     | 541    | 96337 | 57.7 | 96337   | 1.2 | 2.10101810182 | 2.1   | 3.6087 | 0.3769 | 1689 | 1    | 1       | R KGVDFGDFGAPKLE | 227      | 2        |         |        |
| 84 | ENSINO000001573 | ENSMUSG00000002234 | ENSMUSG00000011632 | CTC5              | g11802147refNP_0104078.1 | 5              | 20             | 15.2     | 541    | 96337 | 57.7 | 96337   | 1.2 | 2.10101810182 | 2.1   | 3.6087 | 0.3769 | 1689 | 1    | 1       | R KGVDFGDFGAPKLE | 227      | 2        |         |        |
| 85 | ENSINO000001573 | ENSMUSG00000002234 | ENSMUSG00000011632 | CTC5              | g11802147refNP_0104078.1 | 5              | 20             | 15.2     | 541    | 96337 | 57.7 | 96337   | 1.2 | 2.10101810182 | 2.1   | 3.6087 | 0.3769 | 1689 | 1    | 1       | R KGVDFGDFGAPKLE | 227      | 2        |         |        |
| 86 | ENSINO000001573 | ENSMUSG00000002234 | ENSMUSG00000011632 | CTC5              | g11802147refNP_0104078.1 | 5              | 20             | 15.2     | 541    | 96337 | 57.7 | 96337   | 1.2 | 2.10101810182 | 2.1   | 3.6087 | 0.3769 | 1689 | 1    | 1       | R KGVDFGDFGAPKLE | 227      | 2        |         |        |
| 87 | ENSINO000001573 | ENSMUSG00000002234 | ENSMUSG00000011632 | CTC5              | g11802147refNP_0104078.1 | 5              | 20             | 15.2     | 541    | 96337 | 57.7 | 96337   | 1.2 | 2.10101810182 | 2.1   | 3.6087 | 0.3769 | 1689 | 1    | 1       | R KGVDFGDFGAPKLE | 227      | 2        |         |        |
| 88 | ENSINO000001573 | ENSMUSG00000002234 | ENSMUSG00000011632 | CTC5              | g11802147refNP_0104078.1 | 5              | 20             | 15.2     | 541    | 96337 | 57.7 | 96337   | 1.2 | 2.10101810182 | 2.1   | 3.6087 | 0.3769 | 1689 | 1    | 1       | R KGVDFGDFGAPKLE | 227      | 2        |         |        |
| 89 | ENSINO000001573 | ENSMUSG00000002234 | ENSMUSG00000011632 | CTC5              | g11802147refNP_0104078.1 | 5              | 20             | 15.2     | 541    | 96337 | 57.7 | 96337   | 1.2 | 2.10101810182 | 2.1   | 3.6087 | 0.3769 | 1689 | 1    | 1       | R KGVDFGDFGAPKLE | 227      | 2        |         |        |
| 90 | ENSINO000001573 | ENSMUSG00000002234 | ENSMUSG00000011632 | CTC5              | g11802147refNP_0104078.1 | 5              | 20             | 15.2     | 541    | 96337 | 57.7 | 96337   | 1.2 | 2.10101810182 | 2.1   | 3.6087 | 0.3769 | 1689 | 1    | 1       | R KGVDFGDFGAPKLE | 227      | 2        |         |        |
| 91 | ENSINO000001573 | ENSMUSG00000002234 | ENSMUSG00000011632 | CTC5              | g11802147refNP_0104078.1 | 5              | 20             | 15.2     | 541    | 96337 | 57.7 | 96337   | 1.2 | 2.10101810182 | 2.1   | 3.6087 | 0.3769 | 1689 | 1    | 1       | R KGVDFGDFGAPKLE | 227      | 2        |         |        |
| 92 | ENSINO000001573 | ENSMUSG00000002234 | ENSMUSG00000011632 | CTC5              | g11802147refNP_0104078.1 | 5              | 20             | 15.2     | 541    | 96337 | 57.7 | 96337   | 1.2 | 2.10101810182 | 2.1   | 3.6087 | 0.3769 | 1689 | 1    | 1       | R KGVDFGDFGAPKLE | 227      | 2        |         |        |
| 93 | ENSINO000001573 | ENSMUSG00000002234 | ENSMUSG00000011632 | CTC5              | g11802147refNP_0104078.1 | 5              | 20             | 15.2     | 541    | 96337 | 57.7 | 96337   | 1.2 | 2.10101810182 | 2.1   | 3.6087 | 0.3769 | 1689 | 1    | 1       | R KGVDFGDFGAPKLE | 227      | 2        |         |        |
| 94 | ENSINO000001573 | ENSMUSG00000002234 | ENSMUSG00000011632 | CTC5              | g11802147refNP_0104078.1 | 5              | 20             | 15.2     | 541    | 96337 | 57.7 | 96337   | 1.2 | 2.10101810182 | 2.1   | 3.6087 | 0.3769 | 1689 | 1    | 1       | R KGVDFGDFGAPKLE | 227      | 2        |         |        |
| 95 | ENSINO000001573 | ENSMUSG00000002234 | ENSMUSG00000011632 | CTC5              | g11802147refNP_0104078.1 | 5              | 20             | 15.2     | 541    | 96337 | 57.7 | 96337   | 1.2 | 2.10101810182 | 2.1   | 3.6087 | 0.3769 | 1689 | 1    | 1       | R KGVDFGDFGAPKLE | 227      | 2        |         |        |
| 96 | ENSINO000001573 | ENSMUSG00000002234 | ENSMUSG00000011632 | CTC5              | g11802147refNP_0104078.1 | 5              | 20             | 15.2     | 541    | 96337 | 57.7 | 96337   | 1.2 | 2.10101810182 | 2.1   | 3.6087 | 0.3769 | 1689 | 1    | 1       | R KGVDFGDFGAPKLE | 227      | 2        |         |        |
| 97 | ENSINO000001573 | ENSMUSG00000002234 | ENSMUSG00000011632 | CTC5              | g11802147refNP_0104078.  |                |                |          |        |       |      |         |     |               |       |        |        |      |      |         |                  |          |          |         |        |



192







196

197

Sequence

199

200

| ORTHO_GROUPS |                |                      | GENE_NAME            | Locus | Proteins In Group       | Description             | Sequence Count                    | Spectrum Count | Coverage | Length | MW  | pI    | MatchID | ZXCOR                             | DeIDN | M+H    | +HH   | SpPrk | Ion | Proton | Con       | Sequence | Sequention       | Tryptic | Unique |   |
|--------------|----------------|----------------------|----------------------|-------|-------------------------|-------------------------|-----------------------------------|----------------|----------|--------|-----|-------|---------|-----------------------------------|-------|--------|-------|-------|-----|--------|-----------|----------|------------------|---------|--------|---|
| 1069         | ENSG0000024444 | ENSNMISG000000024391 | ENSNRNOG000000000060 | APOM  | g10690361[pepN_0026246] | g10690361[pepN_0026246] | adopsomone N1 [Rattus norvegicus] | 3              | 6        | 16.8   | 190 | 21513 | 61      | R1N6AKNAH_inve_Pep_20610341010431 | 3     | 4.1654 | 20701 | 17258 | 678 | 5      | 42.807143 | 1        | LGMKQDTPPEPKGLWY | 33      | 0      | * |
| 1069         | ENSG0000024444 | ENSNMISG000000024391 | ENSNRNOG000000000060 | APOM  | g10690361[pepN_0026246] | g10690361[pepN_0026246] | adopsomone N1 [Rattus norvegicus] | 3              | 6        | 16.8   | 190 | 21513 | 61      | R1N6AKNAH_inve_Pep_20610341010431 | 3     | 4.1654 | 20701 | 17258 | 678 | 5      | 42.807143 | 1        | LGMKQDTPPEPKGLWY | 33      | 0      | * |
| 1069         | ENSG0000024444 | ENSNMISG000000024391 | ENSNRNOG000000000060 | APOM  | g10690361[pepN_0026246] | g10690361[pepN_0026246] | adopsomone N1 [Rattus norvegicus] | 3              | 6        | 16.8   | 190 | 21513 | 61      | R1N6AKNAH_inve_Pep_20610341010431 | 3     | 4.1654 | 20701 | 17258 | 678 | 5      | 42.807143 | 1        | LGMKQDTPPEPKGLWY | 33      | 0      | * |
| 1069         | ENSG0000024444 | ENSNMISG000000024391 | ENSNRNOG000000000060 | APOM  | g10690361[pepN_0026246] | g10690361[pepN_0026246] | adopsomone N1 [Rattus norvegicus] | 3              | 6        | 16.8   | 190 | 21513 | 61      | R1N6AKNAH_inve_Pep_20610341010431 | 3     | 4.1654 | 20701 | 17258 | 678 | 5      | 42.807143 | 1        | LGMKQDTPPEPKGLWY | 33      | 0      | * |
| 1069         | ENSG0000024444 | ENSNMISG000000024391 | ENSNRNOG000000000060 | APOM  | g10690361[pepN_0026246] | g10690361[pepN_0026246] | adopsomone N1 [Rattus norvegicus] | 3              | 6        | 16.8   | 190 | 21513 | 61      | R1N6AKNAH_inve_Pep_20610341010431 | 3     | 4.1654 | 20701 | 17258 | 678 | 5      | 42.807143 | 1        | LGMKQDTPPEPKGLWY | 33      | 0      | * |
| 1069         | ENSG0000024444 | ENSNMISG000000024391 | ENSNRNOG000000000060 | APOM  | g10690361[pepN_0026246] | g10690361[pepN_0026246] | adopsomone N1 [Rattus norvegicus] | 3              | 6        | 16.8   | 190 | 21513 | 61      | R1N6AKNAH_inve_Pep_20610341010431 | 3     | 4.1654 | 20701 | 17258 | 678 | 5      | 42.807143 | 1        | LGMKQDTPPEPKGLWY | 33      | 0      | * |
| 1069         | ENSG0000024444 | ENSNMISG000000024391 | ENSNRNOG000000000060 | APOM  | g10690361[pepN_0026246] | g10690361[pepN_0026246] | adopsomone N1 [Rattus norvegicus] | 3              | 6        | 16.8   | 190 | 21513 | 61      | R1N6AKNAH_inve_Pep_20610341010431 | 3     | 4.1654 | 20701 | 17258 | 678 | 5      | 42.807143 | 1        | LGMKQDTPPEPKGLWY | 33      | 0      | * |
| 1069         | ENSG0000024444 | ENSNMISG000000024391 | ENSNRNOG000000000060 | APOM  | g10690361[pepN_0026246] | g10690361[pepN_0026246] | adopsomone N1 [Rattus norvegicus] | 3              | 6        | 16.8   | 190 | 21513 | 61      | R1N6AKNAH_inve_Pep_20610341010431 | 3     | 4.1654 | 20701 | 17258 | 678 | 5      | 42.807143 | 1        | LGMKQDTPPEPKGLWY | 33      | 0      | * |
| 1069         | ENSG0000024444 | ENSNMISG000000024391 | ENSNRNOG000000000060 | APOM  | g10690361[pepN_0026246] | g10690361[pepN_0026246] | adopsomone N1 [Rattus norvegicus] | 3              | 6        | 16.8   | 190 | 21513 | 61      | R1N6AKNAH_inve_Pep_20610341010431 | 3     | 4.1654 | 20701 | 17258 | 678 | 5      | 42.807143 | 1        | LGMKQDTPPEPKGLWY | 33      | 0      | * |
| 1069         | ENSG0000024444 | ENSNMISG000000024391 | ENSNRNOG000000000060 | APOM  | g10690361[pepN_0026246] | g10690361[pepN_0026246] | adopsomone N1 [Rattus norvegicus] | 3              | 6        | 16.8   | 190 | 21513 | 61      | R1N6AKNAH_inve_Pep_20610341010431 | 3     | 4.1654 | 20701 | 17258 | 678 | 5      | 42.807143 | 1        | LGMKQDTPPEPKGLWY | 33      | 0      | * |
| 1069         | ENSG0000024444 | ENSNMISG000000024391 | ENSNRNOG000000000060 | APOM  | g10690361[pepN_0026246] | g10690361[pepN_0026246] | adopsomone N1 [Rattus norvegicus] | 3              | 6        | 16.8   | 190 | 21513 | 61      | R1N6AKNAH_inve_Pep_20610341010431 | 3     | 4.1654 | 20701 | 17258 | 678 | 5      | 42.807143 | 1        | LGMKQDTPPEPKGLWY | 33      | 0      | * |
| 1069         | ENSG0000024444 | ENSNMISG000000024391 | ENSNRNOG000000000060 | APOM  | g10690361[pepN_0026246] | g10690361[pepN_0026246] | adopsomone N1 [Rattus norvegicus] | 3              | 6        | 16.8   | 190 | 21513 | 61      | R1N6AKNAH_inve_Pep_20610341010431 | 3     | 4.1654 | 20701 | 17258 | 678 | 5      | 42.807143 |          |                  |         |        |   |



[illegible]

| nr   | ORTHO_GROUPS   | GENE_NAME         | Locus            | Proteins In Group | Description                                      | Sequence Count | Spectrum Count | Coverage | Length | MW   | pI  | MatchID                                                                                                                                                                                                                                                                                                                                                                                                                                                                                                                                                                                                                                                                                                                                                                                                                                                                                                                                                                                                                                                                                                                                                                                                                                                                                                                                                                                                                                                                                                                                                                                                                                                                                                                                                                                                                                                                                                                                                                                                                                                                                                                                                                                                                                                                                                                                                                                                                                                                                                                                                                                                                                                                                                                                                                                                                                                                                                                                                                                                                                                                                                                                                                                                                                                                                                                                                                                                                                                                                                                                                                                                                                                                                                                                                                                                                                                                                                                                                                                                                                                                                                                                                                                                                                                                                                                                                                                                                                                                                                                                                                                                                                                                                                                                                                                                                                                                                                                                                                                                                                                                                                                                                                                                                                                                                                                                                                                                                                                                                                                                                                                                                                                                                                                                                                                                                                                                                                                                                                                                                                                                                                                                                                                                                                                                                                                                                                                                                                                                                                                                                                                                                                                                                                                                                                                                                                                                                                                                                                                                                                                                                                                                                                                                                                                                                                                                                                                                                                                                                                                                                                                                                                                                                                                                                                                                                                                                                                                                                                                                                                                                                                                                                                                                                                                                                                                                                                                                                                                                                                                                                                                                                                                                                                                                                                                                                                                                                                                                                                                                                                                                                                                                                                                                                                                                                                                                                                                                                                                                                                                                                                                                                                                                                                                                                                                                                                                                                                                                                                                                                                                                                                                                                                                                                                                                                                                                                                                                                                                                                                                                                                                                                                                                                                                                                                                                                                                                                                                                                                                                                                                                                                                                                                                                                                                                                                                                                                                                                                                                                                                                                                                                                                                                                                                                                                                                                                                                                                                                                                                                                                                                                          | X | Z | CCor | DeCm | M | H | V | + | CaIc | Ion | Proton | Count | Sequence | Position | Trypic | Uniqe |
|------|----------------|-------------------|------------------|-------------------|--------------------------------------------------|----------------|----------------|----------|--------|------|-----|--------------------------------------------------------------------------------------------------------------------------------------------------------------------------------------------------------------------------------------------------------------------------------------------------------------------------------------------------------------------------------------------------------------------------------------------------------------------------------------------------------------------------------------------------------------------------------------------------------------------------------------------------------------------------------------------------------------------------------------------------------------------------------------------------------------------------------------------------------------------------------------------------------------------------------------------------------------------------------------------------------------------------------------------------------------------------------------------------------------------------------------------------------------------------------------------------------------------------------------------------------------------------------------------------------------------------------------------------------------------------------------------------------------------------------------------------------------------------------------------------------------------------------------------------------------------------------------------------------------------------------------------------------------------------------------------------------------------------------------------------------------------------------------------------------------------------------------------------------------------------------------------------------------------------------------------------------------------------------------------------------------------------------------------------------------------------------------------------------------------------------------------------------------------------------------------------------------------------------------------------------------------------------------------------------------------------------------------------------------------------------------------------------------------------------------------------------------------------------------------------------------------------------------------------------------------------------------------------------------------------------------------------------------------------------------------------------------------------------------------------------------------------------------------------------------------------------------------------------------------------------------------------------------------------------------------------------------------------------------------------------------------------------------------------------------------------------------------------------------------------------------------------------------------------------------------------------------------------------------------------------------------------------------------------------------------------------------------------------------------------------------------------------------------------------------------------------------------------------------------------------------------------------------------------------------------------------------------------------------------------------------------------------------------------------------------------------------------------------------------------------------------------------------------------------------------------------------------------------------------------------------------------------------------------------------------------------------------------------------------------------------------------------------------------------------------------------------------------------------------------------------------------------------------------------------------------------------------------------------------------------------------------------------------------------------------------------------------------------------------------------------------------------------------------------------------------------------------------------------------------------------------------------------------------------------------------------------------------------------------------------------------------------------------------------------------------------------------------------------------------------------------------------------------------------------------------------------------------------------------------------------------------------------------------------------------------------------------------------------------------------------------------------------------------------------------------------------------------------------------------------------------------------------------------------------------------------------------------------------------------------------------------------------------------------------------------------------------------------------------------------------------------------------------------------------------------------------------------------------------------------------------------------------------------------------------------------------------------------------------------------------------------------------------------------------------------------------------------------------------------------------------------------------------------------------------------------------------------------------------------------------------------------------------------------------------------------------------------------------------------------------------------------------------------------------------------------------------------------------------------------------------------------------------------------------------------------------------------------------------------------------------------------------------------------------------------------------------------------------------------------------------------------------------------------------------------------------------------------------------------------------------------------------------------------------------------------------------------------------------------------------------------------------------------------------------------------------------------------------------------------------------------------------------------------------------------------------------------------------------------------------------------------------------------------------------------------------------------------------------------------------------------------------------------------------------------------------------------------------------------------------------------------------------------------------------------------------------------------------------------------------------------------------------------------------------------------------------------------------------------------------------------------------------------------------------------------------------------------------------------------------------------------------------------------------------------------------------------------------------------------------------------------------------------------------------------------------------------------------------------------------------------------------------------------------------------------------------------------------------------------------------------------------------------------------------------------------------------------------------------------------------------------------------------------------------------------------------------------------------------------------------------------------------------------------------------------------------------------------------------------------------------------------------------------------------------------------------------------------------------------------------------------------------------------------------------------------------------------------------------------------------------------------------------------------------------------------------------------------------------------------------------------------------------------------------------------------------------------------------------------------------------------------------------------------------------------------------------------------------------------------------------------------------------------------------------------------------------------------------------------------------------------------------------------------------------------------------------------------------------------------------------------------------------------------------------------------------------------------------------------------------------------------------------------------------------------------------------------------------------------------------------------------------------------------------------------------------------------------------------------------------------------------------------------------------------------------------------------------------------------------------------------------------------------------------------------------------------------------------------------------------------------------------------------------------------------------------------------------------------------------------------------------------------------------------------------------------------------------------------------------------------------------------------------------------------------------------------------------------------------------------------------------------------------------------------------------------------------------------------------------------------------------------------------------------------------------------------------------------------------------------------------------------------------------------------------------------------------------------------------------------------------------------------------------------------------------------------------------------------------------------------------------------------------------------------------------------------------------------------------------------------------------------------------------------------------------------------------------------------------------------------------------------------------------------------------------------------------------------------------------------------------------------------------------------------------------------------------------------------------------------------------------------------------------------------------------------------------------------------------------------------------------------------------------------------------------------------------------------------------------------------------------------------------------------------------------------------------------------------------------------------------------------------------------------------------------------------------------------------------------------------------------------------------------------------------------------------------------------------------------------------------------------------------------------------------------------------------------------------------------------------------------------------------------------------------------------------------------------------------------------------------------------------------------------------------------------------|---|---|------|------|---|---|---|---|------|-----|--------|-------|----------|----------|--------|-------|
| 1195 | ENSG0000011988 | ENSMUSG0000004398 | ENSRNG0000000007 | TACSTD1           | cytochrome-b5 oxidoreductase (Rattus norvegicus) | 3              | 5              | 181      | 315    | 3027 | 6.4 | 6.RA.NC.HM.HM.VM.VM.VM.VM.VM.VM.VM.VM.VM.VM.VM.VM.VM.VM.VM.VM.VM.VM.VM.VM.VM.VM.VM.VM.VM.VM.VM.VM.VM.VM.VM.VM.VM.VM.VM.VM.VM.VM.VM.VM.VM.VM.VM.VM.VM.VM.VM.VM.VM.VM.VM.VM.VM.VM.VM.VM.VM.VM.VM.VM.VM.VM.VM.VM.VM.VM.VM.VM.VM.VM.VM.VM.VM.VM.VM.VM.VM.VM.VM.VM.VM.VM.VM.VM.VM.VM.VM.VM.VM.VM.VM.VM.VM.VM.VM.VM.VM.VM.VM.VM.VM.VM.VM.VM.VM.VM.VM.VM.VM.VM.VM.VM.VM.VM.VM.VM.VM.VM.VM.VM.VM.VM.VM.VM.VM.VM.VM.VM.VM.VM.VM.VM.VM.VM.VM.VM.VM.VM.VM.VM.VM.VM.VM.VM.VM.VM.VM.VM.VM.VM.VM.VM.VM.VM.VM.VM.VM.VM.VM.VM.VM.VM.VM.VM.VM.VM.VM.VM.VM.VM.VM.VM.VM.VM.VM.VM.VM.VM.VM.VM.VM.VM.VM.VM.VM.VM.VM.VM.VM.VM.VM.VM.VM.VM.VM.VM.VM.VM.VM.VM.VM.VM.VM.VM.VM.VM.VM.VM.VM.VM.VM.VM.VM.VM.VM.VM.VM.VM.VM.VM.VM.VM.VM.VM.VM.VM.VM.VM.VM.VM.VM.VM.VM.VM.VM.VM.VM.VM.VM.VM.VM.VM.VM.VM.VM.VM.VM.VM.VM.VM.VM.VM.VM.VM.VM.VM.VM.VM.VM.VM.VM.VM.VM.VM.VM.VM.VM.VM.VM.VM.VM.VM.VM.VM.VM.VM.VM.VM.VM.VM.VM.VM.VM.VM.VM.VM.VM.VM.VM.VM.VM.VM.VM.VM.VM.VM.VM.VM.VM.VM.VM.VM.VM.VM.VM.VM.VM.VM.VM.VM.VM.VM.VM.VM.VM.VM.VM.VM.VM.VM.VM.VM.VM.VM.VM.VM.VM.VM.VM.VM.VM.VM.VM.VM.VM.VM.VM.VM.VM.VM.VM.VM.VM.VM.VM.VM.VM.VM.VM.VM.VM.VM.VM.VM.VM.VM.VM.VM.VM.VM.VM.VM.VM.VM.VM.VM.VM.VM.VM.VM.VM.VM.VM.VM.VM.VM.VM.VM.VM.VM.VM.VM.VM.VM.VM.VM.VM.VM.VM.VM.VM.VM.VM.VM.VM.VM.VM.VM.VM.VM.VM.VM.VM.VM.VM.VM.VM.VM.VM.VM.VM.VM.VM.VM.VM.VM.VM.VM.VM.VM.VM.VM.VM.VM.VM.VM.VM.VM.VM.VM.VM.VM.VM.VM.VM.VM.VM.VM.VM.VM.VM.VM.VM.VM.VM.VM.VM.VM.VM.VM.VM.VM.VM.VM.VM.VM.VM.VM.VM.VM.VM.VM.VM.VM.VM.VM.VM.VM.VM.VM.VM.VM.VM.VM.VM.VM.VM.VM.VM.VM.VM.VM.VM.VM.VM.VM.VM.VM.VM.VM.VM.VM.VM.VM.VM.VM.VM.VM.VM.VM.VM.VM.VM.VM.VM.VM.VM.VM.VM.VM.VM.VM.VM.VM.VM.VM.VM.VM.VM.VM.VM.VM.VM.VM.VM.VM.VM.VM.VM.VM.VM.VM.VM.VM.VM.VM.VM.VM.VM.VM.VM.VM.VM.VM.VM.VM.VM.VM.VM.VM.VM.VM.VM.VM.VM.VM.VM.VM.VM.VM.VM.VM.VM.VM.VM.VM.VM.VM.VM.VM.VM.VM.VM.VM.VM.VM.VM.VM.VM.VM.VM.VM.VM.VM.VM.VM.VM.VM.VM.VM.VM.VM.VM.VM.VM.VM.VM.VM.VM.VM.VM.VM.VM.VM.VM.VM.VM.VM.VM.VM.VM.VM.VM.VM.VM.VM.VM.VM.VM.VM.VM.VM.VM.VM.VM.VM.VM.VM.VM.VM.VM.VM.VM.VM.VM.VM.VM.VM.VM.VM.VM.VM.VM.VM.VM.VM.VM.VM.VM.VM.VM.VM.VM.VM.VM.VM.VM.VM.VM.VM.VM.VM.VM.VM.VM.VM.VM.VM.VM.VM.VM.VM.VM.VM.VM.VM.VM.VM.VM.VM.VM.VM.VM.VM.VM.VM.VM.VM.VM.VM.VM.VM.VM.VM.VM.VM.VM.VM.VM.VM.VM.VM.VM.VM.VM.VM.VM.VM.VM.VM.VM.VM.VM.VM.VM.VM.VM.VM.VM.VM.VM.VM.VM.VM.VM.VM.VM.VM.VM.VM.VM.VM.VM.VM.VM.VM.VM.VM.VM.VM.VM.VM.VM.VM.VM.VM.VM.VM.VM.VM.VM.VM.VM.VM.VM.VM.VM.VM.VM.VM.VM.VM.VM.VM.VM.VM.VM.VM.VM.VM.VM.VM.VM.VM.VM.VM.VM.VM.VM.VM.VM.VM.VM.VM.VM.VM.VM.VM.VM.VM.VM.VM.VM.VM.VM.VM.VM.VM.VM.VM.VM.VM.VM.VM.VM.VM.VM.VM.VM.VM.VM.VM.VM.VM.VM.VM.VM.VM.VM.VM.VM.VM.VM.VM.VM.VM.VM.VM.VM.VM.VM.VM.VM.VM.VM.VM.VM.VM.VM.VM.VM.VM.VM.VM.VM.VM.VM.VM.VM.VM.VM.VM.VM.VM.VM.VM.VM.VM.VM.VM.VM.VM.VM.VM.VM.VM.VM.VM.VM.VM.VM.VM.VM.VM.VM.VM.VM.VM.VM.VM.VM.VM.VM.VM.VM.VM.VM.VM.VM.VM.VM.VM.VM.VM.VM.VM.VM.VM.VM.VM.VM.VM.VM.VM.VM.VM.VM.VM.VM.VM.VM.VM.VM.VM.VM.VM.VM.VM.VM.VM.VM.VM.VM.VM.VM.VM.VM.VM.VM.VM.VM.VM.VM.VM.VM.VM.VM.VM.VM.VM.VM.VM.VM.VM.VM.VM.VM.VM.VM.VM.VM.VM.VM.VM.VM.VM.VM.VM.VM.VM.VM.VM.VM.VM.VM.VM.VM.VM.VM.VM.VM.VM.VM.VM.VM.VM.VM.VM.VM.VM.VM.VM.VM.VM.VM.VM.VM.VM.VM.VM.VM.VM.VM.VM.VM.VM.VM.VM.VM.VM.VM.VM.VM.VM.VM.VM.VM.VM.VM.VM.VM.VM.VM.VM.VM.VM.VM.VM.VM.VM.VM.VM.VM.VM.VM.VM.VM.VM.VM.VM.VM.VM.VM.VM.VM.VM.VM.VM.VM.VM.VM.VM.VM.VM.VM.VM.VM.VM.VM.VM.VM.VM.VM.VM.VM.VM.VM.VM.VM.VM.VM.VM.VM.VM.VM.VM.VM.VM.VM.VM.VM.VM.VM.VM.VM.VM.VM.VM.VM.VM.VM.VM.VM.VM.VM.VM.VM.VM.VM.VM.VM.VM.VM.VM.VM.VM.VM.VM.VM.VM.VM.VM.VM.VM.VM.VM.VM.VM.VM.VM.VM.VM.VM.VM.VM.VM.VM.VM.VM.VM.VM.VM.VM.VM.VM.VM.VM.VM.VM.VM.VM.VM.VM.VM.VM.VM.VM.VM.VM.VM.VM.VM.VM.VM.VM.VM.VM.VM.VM.VM.VM.VM.VM.VM.VM.VM.VM.VM.VM.VM.VM.VM.VM.VM.VM.VM.VM.VM.VM.VM.VM.VM.VM.VM.VM.VM.VM.VM.VM.VM.VM.VM.VM.VM.VM.VM.VM.VM.VM.VM.VM.VM.VM.VM.VM.VM.VM.VM.VM.VM.VM.VM.VM.VM.VM.VM.VM.VM.VM.VM.VM.VM.VM.VM.VM.VM.VM.VM.VM.VM.VM.VM.VM.VM.VM.VM.VM.VM.VM.VM.VM.VM.VM.VM.VM.VM.VM.VM.VM.VM.VM.VM.VM.VM.VM.VM.VM.VM.VM.VM.VM.VM.VM.VM.VM.VM.VM.VM.VM.VM.VM.VM.VM.VM.VM.VM.VM.VM.VM.VM.VM.VM.VM.VM.VM.VM.VM.VM.VM.VM.VM.VM.VM.VM.VM.VM.VM.VM.VM.VM.VM.VM.VM.VM.VM.VM.VM.VM.VM.VM.VM.VM.VM.VM.VM.VM.VM.VM.VM.VM.VM.VM.VM.VM.VM.VM.VM.VM.VM.VM.VM.VM.VM.VM.VM.VM.VM.VM.VM.VM.VM.VM.VM.VM.VM.VM.VM.VM.VM.VM.VM.VM.VM.VM.VM.VM.VM.VM.VM.VM.VM.VM.VM.VM.VM.VM.VM.VM.VM.VM.VM.VM.VM.VM.VM.VM.VM.VM.VM.VM.VM.VM.VM.VM.VM.VM.VM.VM.VM.VM.VM.VM.VM.VM.VM.VM.VM.VM.VM.VM.VM.VM.VM.VM.VM.VM.VM.VM.VM.VM.VM.VM.VM.VM.VM.VM.VM.VM.VM.VM.VM.VM.VM.VM.VM.VM.VM.VM.VM.VM.VM.VM.VM.VM.VM.VM.VM.VM.VM.VM.VM.VM.VM.VM.VM.VM.VM.VM.VM.VM.VM.VM.VM.VM.VM.VM.VM.VM.VM.VM.VM.VM.VM.VM.VM.VM.VM.VM.VM.VM.VM.VM.VM.VM.VM.VM.VM.VM.VM.VM.VM.VM.VM.VM.VM.VM.VM.VM.VM.VM.VM.VM.VM.VM.VM.VM.VM.VM.VM.VM.VM.VM.VM.VM.VM.VM.VM.VM.VM.VM.VM.VM.VM.VM.VM.VM.VM.VM.VM.VM.VM.VM.VM.VM.VM.VM.VM.VM.VM.VM.VM.VM.VM.VM.VM.VM.VM.VM.VM.VM.VM.VM.VM.VM.VM.VM.VM.VM.VM.VM.VM.VM.VM.VM.VM.VM.VM.VM.VM.VM.VM.VM.VM.VM.VM.VM.VM.VM.VM.VM.VM.VM.VM.VM.VM.VM.VM.VM.VM.VM.VM.VM.VM.VM.VM.VM.VM.VM.VM.VM.VM.VM.VM.VM.VM.VM.VM.VM.VM.VM.VM.VM.VM.VM.VM.VM.VM.VM.VM.VM.VM.VM.VM.VM.VM.VM.VM.VM.VM.VM.VM.VM.VM.VM.VM.VM.VM.VM.VM.VM.VM.VM.VM.VM.VM.VM.VM.VM.VM.VM.VM.VM.VM.VM.VM.VM.VM.VM.VM.VM.VM.VM.VM.VM.VM.VM.VM.VM.VM.VM.VM.VM.VM.VM.VM.VM.VM.VM.VM.VM.VM.VM.VM.VM.VM.VM.VM.VM.VM.VM.VM.VM.VM.VM.VM.VM.VM.VM.VM.VM.VM.VM.VM.VM.VM.VM.VM.VM.VM.VM.VM.VM.VM.VM.VM.VM.VM.VM.VM.VM.VM.VM.VM.VM.VM.VM.VM.VM.VM.VM.VM.VM.VM.VM.VM.VM.VM.VM.VM.VM.VM.VM.VM.VM.VM.VM.VM.VM.VM.VM.VM.VM.VM.VM.VM.VM.VM.VM.VM.VM.VM.VM.VM.VM.VM.VM.VM.VM.VM.VM.VM.VM.VM.VM.VM.VM.VM.VM.VM.VM.VM.VM.VM.VM.VM.VM.VM.VM.VM.VM.VM.VM.VM.VM.VM.VM.VM.VM.VM.VM.VM.VM.VM.VM.VM.VM.VM.VM.VM.VM.VM.VM.VM.VM.VM.VM.VM.VM.VM.VM.VM.VM.VM.VM.VM.VM.VM.VM.VM.VM.VM.VM.VM.VM.VM.VM.VM.VM.VM.VM.VM.VM.VM.VM.VM.VM.VM.VM.VM.VM.VM.VM.VM.VM.VM.VM.VM.VM.VM.VM.VM.VM.VM.VM.VM.VM.VM.VM.VM.VM.VM.VM.VM.VM.VM.VM.VM.VM.VM.VM.VM.VM.VM.VM.VM.VM.VM.VM.VM.VM.VM.VM.VM.VM.VM.VM.VM.VM.VM.VM.VM.VM.VM.VM.VM.VM.VM.VM.VM.VM.VM.VM.VM.VM.VM.VM.VM.VM.VM.VM.VM.VM.VM.VM.VM.VM.VM.VM.VM.VM.VM.VM.VM.VM.VM.VM.VM.VM.VM.VM.VM.VM.VM.VM.VM.VM.VM.VM.VM.VM.VM.VM.VM.VM.VM.VM.VM.VM.VM.VM.VM.VM.VM.VM.VM.VM.VM.VM.VM.VM.VM.VM.VM.VM.VM.VM.VM.VM.VM.VM.VM.VM.VM.VM.VM.VM.VM.VM.VM.VM.VM.VM.VM.VM.VM.VM.VM.VM.VM.VM.VM.VM.VM.VM.VM.VM.VM.VM.VM.VM.VM.VM.VM.VM.VM.VM.VM.VM.VM.VM.VM.VM.VM.VM.VM.VM.VM.VM.VM.VM.VM.VM.VM.VM.VM.VM.VM.VM.VM.VM.VM.VM.VM.VM.VM.VM.VM.VM.VM.VM.VM.VM.VM.VM.VM.VM.VM.VM.VM.VM.VM.VM.VM.VM.VM.VM.VM.VM.VM.VM.VM.VM.VM.VM.VM.VM.VM.VM.VM.VM.VM.VM.VM.VM.VM.VM.VM.VM.VM.VM.VM.VM.VM.VM.VM.VM.VM.VM.VM.VM.VM.VM.VM.VM.VM.VM.VM.VM.VM.VM.VM.VM.VM.VM.VM.VM.VM.VM.VM.VM.VM.VM.VM.VM.VM.VM.VM.VM.VM.VM.VM.VM.VM.VM.VM.VM.VM.VM.VM.VM.VM.VM.VM.VM.VM.VM.VM.VM.VM.VM.VM.VM.VM.VM.VM.VM.VM.VM.VM.VM.VM.VM.VM.VM.VM.VM.VM.VM.VM.VM.VM.VM.VM.VM.VM.VM.VM.VM.VM.VM.VM.VM.VM.VM.VM.VM.VM.VM.VM.VM.VM.VM.VM.VM.VM.VM.VM.VM.VM.VM.VM.VM.VM.VM.VM.VM.VM.VM.VM.VM.VM.VM.VM.VM.VM.VM.VM.VM.VM.VM.VM.VM.VM.VM.VM.VM.VM.VM.VM.VM.VM.VM.VM.VM.VM.VM.VM.VM.VM.VM.VM.VM.VM.VM.VM.VM.VM.VM.VM.VM.VM.VM.VM.VM.VM.VM.VM.VM.VM.VM.VM.VM.VM.VM.VM.VM.VM.VM.VM.VM.VM.VM.VM.VM.VM.VM.VM.VM.VM.VM.VM.VM.VM.VM.VM.VM.VM.VM.VM.VM.VM.VM.VM.VM.VM.VM.VM.VM.VM.VM.VM.VM.VM.VM.VM.VM.VM.VM.VM.VM.VM.VM.VM.VM.VM.VM.VM.VM.VM.VM.VM.VM.VM.VM.VM.VM.VM.VM.VM.VM.VM.VM.VM.VM.VM.VM.VM.VM.VM.VM.VM.VM.VM.VM.VM.VM.VM.VM.VM.VM.VM.VM.VM.VM.VM.VM.VM.VM.VM.VM.VM.VM.VM.VM.VM.VM.VM.VM.VM.VM.VM.VM.VM.VM.VM.VM.VM.VM.VM.VM.VM.VM.VM.VM.VM.VM.VM.VM.VM.VM.VM.VM.VM.VM.VM.VM.VM.VM.VM.VM.VM.VM.VM.VM.VM.VM.VM.VM.VM.VM.VM.VM.VM.VM.VM.VM.VM.VM.VM.VM.VM.VM.VM.VM.VM.VM.VM.VM.VM.VM.VM.VM.VM.VM.VM.VM.VM.VM.VM.VM.VM.VM.VM.VM.VM.VM.VM.VM.VM.VM.VM.VM.VM.VM.VM.VM.VM.VM.VM.VM.VM.VM.VM.VM.VM.VM.VM.VM.VM.VM.VM.VM.VM.VM.VM.VM.VM.VM.VM.VM.VM.VM.VM.VM.VM.VM.VM.VM.VM.VM.VM.VM.VM.VM.VM.VM.VM.VM.VM.VM.VM.VM.VM.VM.VM.VM.VM.VM.VM.VM.VM.VM.VM.VM.VM.VM.VM.VM.VM.VM.VM.VM.VM.VM.VM.VM.VM.VM.VM.VM.VM.VM.VM.VM.VM.VM.VM.VM.VM.VM.VM.VM.VM.VM.VM.VM.VM.VM.VM.VM.VM.VM.VM.VM.VM.VM.VM.VM.VM.VM.VM.VM.VM.VM.VM.VM.VM.VM.VM.VM.VM.VM.VM.VM.VM.VM.VM.VM.VM.VM.VM.VM.VM.VM.VM.VM.VM.VM.VM.VM.VM.VM.VM.VM.VM.VM.VM.VM.VM.VM.VM.VM.VM.VM.VM.VM.VM.VM.VM.VM.VM.VM.VM.VM.VM.VM.VM.VM.VM.VM.VM.VM.VM.VM.VM.VM.VM.VM.VM.VM.VM.VM.VM.VM.VM.VM.VM.VM.VM.VM.VM.VM.VM.VM.VM.VM.VM.VM.VM.VM.VM.VM.VM.VM.VM.VM.VM.VM.VM.VM.VM.VM.VM.VM.VM.VM.VM.VM.VM.VM.VM.VM.VM.VM.VM.VM.VM.VM.VM.VM.VM.VM.VM.VM.VM.VM.VM.VM.VM.VM.VM.VM.VM.VM.VM.VM.VM.VM.VM.VM.VM.VM.VM.VM.VM.VM.VM.VM.VM.VM.VM.VM.VM.VM.VM.VM.VM.VM.VM.VM.VM.VM.VM.VM.VM.VM.VM.VM.VM.VM.VM.VM.VM.VM.VM.VM.VM.VM.VM.VM.VM.VM.VM.VM.VM.VM.VM.VM.VM.VM.VM.VM.VM.VM.VM.VM.VM.VM.VM.VM.VM.VM.VM.VM.VM.VM.VM.VM.VM.VM.VM.VM.VM.VM.VM.VM.VM.VM.VM.VM.VM.VM.VM.VM.VM.VM.VM.VM.VM.VM.VM.VM.VM.VM.VM.VM.VM.VM.VM.VM.VM.VM.VM.VM.VM.VM.VM.VM.VM.VM.VM.VM.VM.VM.VM.VM.VM.VM.VM.VM.VM.VM.VM.VM.VM.VM.VM.VM.VM.VM.VM.VM.VM.VM.VM.VM.VM.VM.VM.VM.VM.VM.VM.VM.VM.VM.VM.VM.VM.VM.VM.VM.VM.VM.VM.VM.VM.VM.VM.VM.VM.VM.VM.VM.VM.VM.VM.VM.VM.VM.VM.VM.VM.VM.VM.VM.VM.VM.VM.VM.VM.VM.VM.VM.VM.VM.VM.VM.VM.VM.VM.VM.VM.VM.VM.VM.VM.VM.VM.VM.VM.VM.VM.VM.VM.VM.VM.VM.VM.VM.VM.VM.VM.VM.VM.VM.VM.VM.VM.VM.VM.VM.VM.VM.VM.VM.VM.VM.VM.VM.VM.VM.VM.VM.VM.VM.VM.VM.VM.VM.VM.VM.VM.VM.VM.VM.VM.VM.VM.VM.VM.VM.VM.VM.VM.VM.VM.VM.VM.VM.VM.VM.VM.VM.VM.VM.VM.VM.VM.VM.VM.VM.VM.VM.VM.VM.VM.VM.VM.VM.VM.VM.VM.VM.VM.VM.VM.VM.VM.VM.VM.VM.VM.VM.VM.VM.VM.VM.VM.VM.VM.VM.VM.VM.VM.VM.VM.VM.VM.VM.VM.VM.VM.VM.VM.VM.VM.VM.VM.VM.VM.VM.VM.VM.VM.VM.VM.VM.VM.VM.VM.VM.VM.VM.VM.VM.VM.VM.VM.VM.VM.VM.VM.VM.VM.VM.VM.VM.VM.VM.VM.VM.VM.VM.VM.VM.VM.VM.VM.VM.VM.VM.VM.VM.VM.VM.VM.VM.VM.VM.VM.VM.VM.VM.VM.VM.VM.VM.VM.VM.VM.VM.VM.VM.VM.VM.VM.VM.VM.VM.VM.VM.VM.VM.VM.VM.VM.VM.VM.VM.VM.VM.VM.VM.VM.VM.VM.VM.VM.VM.VM.VM.VM.VM.VM.VM.VM.VM.VM.VM.VM.VM.VM.VM.VM.VM.VM.VM.VM.VM.VM.VM.VM.VM.VM.VM.VM.VM.VM.VM.VM.VM.VM.VM.VM.VM.VM.VM.VM.VM.VM.VM.VM.VM.VM.VM.VM.VM.VM.VM.VM.VM.VM.VM.VM.VM.VM.VM.VM.VM.VM.VM.VM.VM.VM.VM.VM.VM.VM.VM.VM.VM.VM.VM.VM.VM.VM.VM.VM.VM.VM.VM.VM.VM.VM.VM.VM.VM.VM.VM.VM.VM.VM.VM.VM.VM.VM.VM.VM.VM.VM.VM.VM.VM.VM.VM.VM.VM.VM.VM.VM.VM.VM.VM.VM.VM.VM.VM.VM.VM.VM.VM.VM.VM.VM.VM.VM.VM.VM.VM.VM.VM.VM.VM.VM.VM.VM.VM.VM.VM.VM.VM.VM.VM.VM.VM.VM.VM.VM.VM.VM.VM.VM.VM.VM.VM.VM.VM.VM.VM.VM.VM.VM.VM.VM.VM.VM.VM.VM.VM.VM.VM.VM.VM.VM.VM.VM.VM.VM.VM.VM.VM.VM.VM.VM.VM.VM.VM.VM.VM.VM.VM.VM.VM.VM.VM.VM.VM.VM.VM.VM.VM.VM.VM.VM.VM.VM.VM.VM.VM.VM.VM.VM.VM.VM.VM.VM.VM.VM.VM.VM.VM.VM.VM.VM.VM.VM.VM.VM.VM.VM.VM.VM.VM.VM.VM.VM.VM.VM.VM.VM.VM.VM.VM.VM.VM.VM.VM.VM.VM.VM.VM.VM.VM.VM.VM.VM.VM.VM.VM.VM.VM.VM.VM.VM.VM.VM.VM.VM.VM.VM.VM.VM.VM.VM.VM.VM.VM.VM.VM.VM.VM.VM.VM.VM.VM.VM.VM.VM.VM.VM.VM.VM.VM.VM.VM.VM.VM.VM.VM.VM.VM.VM.VM.VM.VM.VM.VM.VM.VM.VM.VM.VM.VM.VM.VM.VM.VM.VM.VM.VM.VM.VM.VM.VM.VM.VM.VM.VM.VM.VM.VM.VM.VM.VM.VM.VM.VM.VM.VM.VM.VM.VM.VM.VM.VM.VM.VM.VM.VM.VM.VM.VM.VM.VM.VM.VM.VM.VM.VM.VM.VM.VM.VM.VM.VM.VM.VM.VM.VM.VM.VM.VM.VM.VM.VM.VM.VM.VM.VM.VM.VM.VM.VM.VM.VM.VM.VM.VM.VM.VM.VM.VM.VM.VM.VM.VM.VM.VM.VM.VM.VM.VM.VM.VM.VM.VM.VM.VM.VM.VM.VM.VM.VM.VM.VM.VM.VM.VM.VM.VM.VM.VM.VM.VM.VM.VM.VM.VM.VM.VM.VM.VM.VM.VM.VM.VM.VM.VM.VM.VM.VM.VM.VM.VM.VM.VM.VM.VM.VM.VM.VM.VM.VM.VM.VM.VM.VM.VM.VM.VM.VM.VM.VM.VM.VM.VM.VM.VM.VM.VM.VM.VM.VM.VM.VM.VM.VM.VM.VM.VM.VM.VM.VM.VM.VM.VM.VM.VM.VM.VM.VM.VM.VM.VM.VM.VM.VM.VM.VM.VM.VM.VM.VM.VM.VM.VM.VM.VM.VM.VM.VM.VM.VM.VM.VM.VM.VM.VM.VM.VM.VM.VM.VM.VM.VM.VM.VM.VM.VM.VM.VM.VM.VM.VM.VM.VM.VM.VM.VM.VM.VM.VM.VM.VM.VM.VM.VM.VM.VM.VM.VM.VM.VM.VM.VM.VM.VM.VM.VM.VM.VM.VM.VM.VM.VM.VM.VM.VM.VM.VM.VM.VM.VM.VM.VM.VM.VM.VM.VM.VM.VM.VM.VM.VM.VM.VM.VM.VM.VM.VM.VM.VM.VM.VM.VM.VM.VM.VM.VM.VM.VM.VM.VM.VM.VM.VM.VM.VM.VM.VM.VM.VM.VM.VM.VM.VM.VM.VM.VM.VM.VM.VM.VM.VM.VM.VM.VM.VM.VM.VM.VM.VM.VM.VM.VM.VM.VM.VM.VM.VM.VM.VM.VM.VM.VM.VM.VM.VM.VM.VM.VM.VM.VM.VM.VM.VM.VM.VM.VM.VM.VM.VM.VM.VM.VM.VM.VM.VM.VM.VM.VM.VM.VM.VM.VM.VM.VM.VM.VM.VM.VM.VM.VM.VM.VM.VM.VM.VM.VM.VM.VM.VM.VM.VM.VM.VM.VM.VM.VM.VM.VM.VM.VM.VM.VM.VM.VM.VM.VM.VM.VM.VM.VM.VM.VM.VM.VM.VM.VM.VM.VM.VM.VM.VM.VM.VM.VM.VM.VM.VM.VM.VM.VM.VM.VM.VM.VM.VM.VM.VM.VM.VM.VM.VM.VM.VM.VM.VM.VM.VM.VM.VM.VM.VM.VM.VM.VM.VM.VM.VM.VM.VM.VM.VM.VM.VM.VM.VM.VM.VM.VM.VM.VM.VM.VM.VM.V |   |   |      |      |   |   |   |   |      |     |        |       |          |          |        |       |

98 2 \*





208

| rk  | ORTHO_GROUPS                                               | GENE_NAME | Locus                       | Proteins In Group           | Description                                                  | Sequence Count | Spectrum Count | Coverage | Length | MW    | pI  | MatchID                             | Z XCOR  | DetCN  | MH++     | CalcM   | Ion | SpRk     | Proportion | Count                   | Sequence | Sequence Position | Tryptic | Unique |
|-----|------------------------------------------------------------|-----------|-----------------------------|-----------------------------|--------------------------------------------------------------|----------------|----------------|----------|--------|-------|-----|-------------------------------------|---------|--------|----------|---------|-----|----------|------------|-------------------------|----------|-------------------|---------|--------|
| 142 | ENSNGS00000162365.ENSUSG00000002827.15.ENSNRN0000000003154 | CYPA422   | [109475336]e9f9p_00172959.1 | [109475336]e9f9p_00172959.1 | PREDICTED: similar to Cytochrome P450 A42 precursor (CYPA42) | 38             | 395            | 48       | 504    | 57832 | 8.8 | RatNoHM_MJMV_PK_111011630.011630.2  | 2.34028 | 3.4007 | 17355.51 | 17359.1 | 8   | 97.14286 | 2          | RACACQWETDGVK.M         | 248      | 2                 |         |        |
| 142 | ENSNGS00000162365.ENSUSG00000002827.15.ENSNRN0000000003154 | CYPA422   | [109475336]e9f9p_00172959.1 | [109475336]e9f9p_00172959.1 | PREDICTED: similar to Cytochrome P450 A42 precursor (CYPA42) | 38             | 395            | 48       | 504    | 57832 | 8.8 | RatNoHM_MJMV_PK_204.010070.010070.2 | 2.39223 | 3.6312 | 1884.97  | 1883.1  | 50  | 95.26    | 2          | RSAYFNSSGSGRL           | 228      | 2                 |         |        |
| 142 | ENSNGS00000162365.ENSUSG00000002827.15.ENSNRN0000000003154 | CYPA422   | [109475336]e9f9p_00172959.1 | [109475336]e9f9p_00172959.1 | PREDICTED: similar to Cytochrome P450 A42 precursor (CYPA42) | 38             | 395            | 48       | 504    | 57832 | 8.8 | RatNoHM_MJMV_PK_203.005585.005585.1 | 2.13397 | 3.2328 | 1596.41  | 1595.2  | 50  | 94.8652  | 2          | FAKRCGSLFLP             | 313      | 2                 |         |        |
| 142 | ENSNGS00000162365.ENSUSG00000002827.15.ENSNRN0000000003154 | CYPA422   | [109475336]e9f9p_00172959.1 | [109475336]e9f9p_00172959.1 | PREDICTED: similar to Cytochrome P450 A42 precursor (CYPA42) | 38             | 395            | 48       | 504    | 57832 | 8.8 | RatNoHM_MJMV_PK_202.006868.006868.2 | 2.50223 | 3.6328 | 1756.85  | 1753.9  | 50  | 97.85714 | 2          | RACACQWETDGVK.M         | 248      | 2                 |         |        |
| 142 | ENSNGS00000162365.ENSUSG00000002827.15.ENSNRN0000000003154 | CYPA422   | [109475336]e9f9p_00172959.1 | [109475336]e9f9p_00172959.1 | PREDICTED: similar to Cytochrome P450 A42 precursor (CYPA42) | 38             | 395            | 48       | 504    | 57832 | 8.8 | RatNoHM_MJMV_PK_103.011630.011630.2 | 2.18565 | 3.3666 | 1437.61  | 1436.2  | 4   | 72.72727 | 4          | LVTPWEGPACGLV.W         | 164      | 4                 |         |        |
| 142 | ENSNGS00000162365.ENSUSG00000002827.15.ENSNRN0000000003154 | CYPA422   | [109475336]e9f9p_00172959.1 | [109475336]e9f9p_00172959.1 | PREDICTED: similar to Cytochrome P450 A42 precursor (CYPA42) | 38             | 395            | 48       | 504    | 57832 | 8.8 | RatNoHM_MJMV_PK_205.009724.009724.2 | 2.34501 | 3.6333 | 1435.85  | 1436.6  | 4   | 72.72727 | 4          | LVTPWEGPACGLV.W         | 164      | 4                 |         |        |
| 142 | ENSNGS00000162365.ENSUSG00000002827.15.ENSNRN0000000003154 | CYPA422   | [109475336]e9f9p_00172959.1 | [109475336]e9f9p_00172959.1 | PREDICTED: similar to Cytochrome P450 A42 precursor (CYPA42) | 38             | 395            | 48       | 504    | 57832 | 8.8 | RatNoHM_MJMV_PK_108.008393.008393.2 | 2.21412 | 3.6806 | 2218.925 | 2216.1  | 3   | 28.25224 | 1          | LATPHVGEHREVEQSLG.V     | 332      | 0                 |         |        |
| 142 | ENSNGS00000162365.ENSUSG00000002827.15.ENSNRN0000000003154 | CYPA422   | [109475336]e9f9p_00172959.1 | [109475336]e9f9p_00172959.1 | PREDICTED: similar to Cytochrome P450 A42 precursor (CYPA42) | 38             | 395            | 48       | 504    | 57832 | 8.8 | RatNoHM_MJMV_PK_111.012777.012777.2 | 2.18297 | 3.2339 | 1402.146 | 1402.1  | 50  | 94.6656  | 2          | RHSHAFPLVSGSQR.N        | 448      | 2                 |         |        |
| 142 | ENSNGS00000162365.ENSUSG00000002827.15.ENSNRN0000000003154 | CYPA422   | [109475336]e9f9p_00172959.1 | [109475336]e9f9p_00172959.1 | PREDICTED: similar to Cytochrome P450 A42 precursor (CYPA42) | 38             | 395            | 48       | 504    | 57832 | 8.8 | RatNoHM_MJMV_PK_113.021867.021867.1 | 3.88072 | 4.6047 | 2899.8   | 2893.7  | 33  | 63.69662 | 4          | KLDQDCHPEFYHVM.LDVTWK.C | 170      | 2                 |         |        |
| 142 | ENSNGS00000162365.ENSUSG00000002827.15.ENSNRN0000000003154 | CYPA422   | [109475336]e9f9p_00172959.1 | [109475336]e9f9p_00172959.1 | PREDICTED: similar to Cytochrome P450 A42 precursor (CYPA42) | 38             | 395            | 48       | 504    | 57832 | 8.8 | RatNoHM_MJMV_PK_113.012818.012818.2 | 2.4111  | 3.6474 | 1361.39  | 1362.3  | 4   | 41.35448 | 4          | RHSHAFPLVSGSQR.N        | 448      | 2                 |         |        |
| 142 | ENSNGS00000162365.ENSUSG00000002827.15.ENSNRN0000000003154 | CYPA422   | [109475336]e9f9p_00172959.1 | [109475336]e9f9p_00172959.1 | PREDICTED: similar to Cytochrome P450 A42 precursor (CYPA42) | 38             | 395            | 48       | 504    | 57832 | 8.8 | RatNoHM_MJMV_PK_12.012017.012017.2  | 2.16084 | 3.2111 | 1447.157 | 1447.1  | 50  | 92.4     | 2          | VLGVYVFWPPWK.V          | 141      | 2                 |         |        |
| 142 | ENSNGS00000162365.ENSUSG00000002827.15.ENSNRN0000000003154 | CYPA422   | [109475336]e9f9p_00172959.1 | [109475336]e9f9p_00172959.1 | PREDICTED: similar to Cytochrome P450 A42 precursor (CYPA42) | 38             | 395            | 48       | 504    | 57832 | 8.8 | RatNoHM_MJMV_PK_102.005988.005988.2 | 2.18767 | 3.2339 | 1402.146 | 1402.1  | 50  | 94.6656  | 2          | RHSHAFPLVSGSQR.N        | 448      | 2                 |         |        |
| 142 | ENSNGS00000162365.ENSUSG00000002827.15.ENSNRN0000000003154 | CYPA422   | [109475336]e9f9p_00172959.1 | [109475336]e9f9p_00172959.1 | PREDICTED: similar to Cytochrome P450 A42 precursor (CYPA42) | 38             | 395            | 48       | 504    | 57832 | 8.8 | RatNoHM_MJMV_PK_204.006762.006762.2 | 2.16526 | 3.3167 | 1660.7   | 1659.8  | 1   | 71.24807 | 2          | KMEDKSLSEDLRAE.V        | 204      | 1                 |         |        |
| 142 | ENSNGS00000162365.ENSUSG00000002827.15.ENSNRN0000000003154 | CYPA422   | [109475336]e9f9p_00172959.1 | [109475336]e9f9p_00172959.1 | PREDICTED: similar to Cytochrome P450 A42 precursor (CYPA42) | 38             | 395            | 48       | 504    | 57832 | 8.8 | RatNoHM_MJMV_PK_108.008714.008714.3 | 3.5221  | 3.2199 | 2550.62  | 2550.7  | 6   | 29.86261 | 1          | LATPHVGEHREVEQSLG.DGT.S | 332      | 0                 |         |        |
| 142 | ENSNGS00000162365.ENSUSG00000002827.15.ENSNRN0000000003154 | CYPA422   | [109475336]e9f9p_00172959.1 | [109475336]e9f9p_00172959.1 | PREDICTED: similar to Cytochrome P450 A42 precursor (CYPA42) | 38             | 395            | 48       | 504    | 57832 | 8.8 | RatNoHM_MJMV_PK_111.012603.012603.2 | 2.17496 | 3.381  | 1341.95  | 1341.4  | 50  | 94.8652  | 2          | MLDQWELVSGSQR.FLP       | 164      | 2                 |         |        |
| 142 | ENSNGS00000162365.ENSUSG00000002827.15.ENSNRN0000000003154 | CYPA422   | [109475336]e9f9p_00172959.1 | [109475336]e9f9p_00172959.1 | PREDICTED: similar to Cytochrome P450 A42 precursor (CYPA42) | 38             | 395            | 48       | 504    | 57832 | 8.8 | RatNoHM_MJMV_PK_111.012385.012385.1 | 3.16196 | 3.3963 | 1466.147 | 1467.1  | 50  | 96.66667 | 6          | VLGVYVFWPPWK.V          | 141      | 2                 |         |        |
| 142 | ENSNGS00000162365.ENSUSG00000002827.15.ENSNRN0000000003154 | CYPA422   | [109475336]e9f9p_00172959.1 | [109475336]e9f9p_00172959.1 | PREDICTED: similar to Cytochrome P450 A42 precursor (CYPA42) | 38             | 395            | 48       | 504    | 57832 | 8.8 | RatNoHM_MJMV_PK_106.005988.005988.2 | 2.18767 | 3.2339 | 1402.146 | 1402.1  | 50  | 94.6656  | 2          | RELSFYPVTPGDS.R         | 164      | 2                 |         |        |
| 142 | ENSNGS00000162365.ENSUSG00000002827.15.ENSNRN0000000003154 | CYPA422   | [109475336]e9f9p_00172959.1 | [109475336]e9f9p_00172959.1 | PREDICTED: similar to Cytochrome P450 A42 precursor (CYPA42) | 38             | 395            | 48       | 504    | 57832 | 8.8 | RatNoHM_MJMV_PK_105.013181.013181.2 | 2.42825 | 3.0237 | 2141.7   | 2142.4  | 1   | 65.625   | 2          | MLDQWELVSGSQR.FLP       | 164      | 0                 |         |        |
| 142 | ENSNGS00000162365.ENSUSG00000002827.15.ENSNRN0000000003154 | CYPA422   | [109475336]e9f9p_00172959.1 | [109475336]e9f9p_00172959.1 | PREDICTED: similar to Cytochrome P450 A42 precursor (CYPA42) | 38             | 395            | 48       | 504    | 57832 | 8.8 | RatNoHM_MJMV_PK_203.011477.011477.1 | 2.2811  | 3.1638 | 1395.5   | 1395.4  | 1   | 72.72727 | 1          | RELSFYPVTPGDS.R         | 164      | 0                 |         |        |
| 142 | ENSNGS00000162365.ENSUSG00000002827.15.ENSNRN0000000003154 | CYPA422   | [109475336]e9f9p_00172959.1 | [109475336]e9f9p_00172959.1 | PREDICTED: similar to Cytochrome P450 A42 precursor (CYPA42) | 38             | 395            | 48       | 504    | 57832 | 8.8 | RatNoHM_MJMV_PK_203.011477.011477.1 | 2.2811  | 3.1638 | 1395.5   | 1395.4  | 1   | 72.72727 | 1          | RELSFYPVTPGDS.R         | 164      | 0                 |         |        |
| 142 | ENSNGS00000162365.ENSUSG00000002827.15.ENSNRN0000000003154 | CYPA422   | [109475336]e9f9p_00172959.1 | [109475336]e9f9p_00172959.1 | PREDICTED: similar to Cytochrome P450 A42 precursor (CYPA42) | 38             | 395            | 48       | 504    | 57832 | 8.8 | RatNoHM_MJMV_PK_102.005988.005988.2 | 2.18767 | 3.2339 | 1402.146 | 1402.1  | 50  | 94.6656  | 2          | RELSFYPVTPGDS.R         | 164      | 0                 |         |        |
| 142 | ENSNGS00000162365.ENSUSG00000002827.15.ENSNRN0000000003154 | CYPA422   | [109475336]e9f9p_00172959.1 | [109475336]e9f9p_00172959.1 | PREDICTED: similar to Cytochrome P450 A42 precursor (CYPA42) | 38             | 395            | 48       | 504    | 57832 | 8.8 | RatNoHM_MJMV_PK_103.007070.007070.2 | 2.298   | 3.1333 | 1447.149 | 1446.1  | 1   | 75       | 2          | KMEDKSLSEDLRAE.V        | 204      | 2                 |         |        |
| 142 | ENSNGS00000162365.ENSUSG00000002827.15.ENSNRN0000000003154 | CYPA422   | [109475336]e9f9p_00172959.1 | [109475336]e9f9p_00172959.1 | PREDICTED: similar to Cytochrome P450 A42 precursor (CYPA42) | 38             | 395            | 48       | 504    | 57832 | 8.8 | RatNoHM_MJMV_PK_102.005988.005988.2 | 2.18767 | 3.2339 | 1402.146 | 1402.1  | 50  | 94.6656  | 2          | RELSFYPVTPGDS.R         | 164      | 0                 |         |        |
| 142 | ENSNGS00000162365.ENSUSG00000002827.15.ENSNRN0000000003154 | CYPA422   | [109475336]e9f9p_00172959.1 | [109475336]e9f9p_00172959.1 | PREDICTED: similar to Cytochrome P450 A42 precursor (CYPA42) | 38             | 395            | 48       | 504    | 57832 | 8.8 | RatNoHM_MJMV_PK_103.007070.007070.2 | 2.298   | 3.1333 | 1447.149 | 1446.1  | 1   | 75       | 2          | KMEDKSLSEDLRAE.V        | 204      | 2                 |         |        |
| 142 | ENSNGS00000162365.ENSUSG00000002827.15.ENSNRN0000000003154 | CYPA422   | [109475336]e9f9p_00172959.1 | [109475336]e9f9p_00172959.1 | PREDICTED: similar to Cytochrome P450 A42 precursor (CYPA42) | 38             | 395            | 48       | 504    | 57832 | 8.8 | RatNoHM_MJMV_PK_103.007070.007070.2 | 2.298   | 3.1333 | 1447.149 | 1446.1  | 1   | 75       | 2          | KMEDKSLSEDLRAE.V        | 204      | 2                 |         |        |
| 142 | ENSNGS00000162365.ENSUSG00000002827.15.ENSNRN0000000003154 | CYPA422   | [109475336]e9f9p_00172959.1 | [109475336]e9f9p_00172959.1 | PREDICTED: similar to Cytochrome P450 A42 precursor (CYPA42) | 38             | 395            | 48       | 504    | 57832 | 8.8 | RatNoHM_MJMV_PK_103.007070.007070.2 | 2.298   | 3.1333 | 1447.149 | 1446.1  | 1   | 75       | 2          | KMEDKSLSEDLRAE.V        | 204      | 2                 |         |        |
| 142 | ENSNGS00000162365.ENSUSG00000002827.15.ENSNRN0000000003154 | CYPA422   | [109475336]e9f9p_00172959.1 | [109475336]e9f9p_00172959.1 | PREDICTED: similar to Cytochrome P450 A42 precursor (CYPA42) | 38             | 395            | 48       | 504    | 57832 | 8.8 | RatNoHM_MJMV_PK_103.007070.007070.2 | 2.298   | 3.1333 | 1447.149 | 1446.1  | 1   | 75       | 2          | KMEDKSLSEDLRAE.V        | 204      | 2                 |         |        |
| 142 | ENSNGS00000162365.ENSUSG00000002827.15.ENSNRN0000000003154 | CYPA422   | [109475336]e9f9p_00172959.1 | [109475336]e9f9p_00172959.1 | PREDICTED: similar to Cytochrome P450 A42 precursor (CYPA42) | 38             | 395            | 48       | 504    | 57832 | 8.8 | RatNoHM_MJMV_PK_103.007070.007070.2 | 2.298   | 3.1333 | 1447.149 | 1446.1  | 1   | 75       | 2          | KMEDKSLSEDLRAE.V        | 204      | 2                 |         |        |
| 142 | ENSNGS00000162365.ENSUSG00000002827.15.ENSNRN0000000003154 | CYPA422   | [109475336]e9f9p_00172959.1 | [109475336]e9f9p_00172959.1 | PREDICTED: similar to Cytochrome P450 A42 precursor (CYPA42) | 38             | 395            | 48       | 504    | 57832 | 8.8 | RatNoHM_MJMV_PK_103.007070.007070.2 | 2.298   | 3.1333 | 1447.149 | 1446.1  | 1   | 75       | 2          | KMEDKSLSEDLRAE.V        | 204      | 2                 |         |        |
| 142 | ENSNGS00000162365.ENSUSG00000002827.15.ENSNRN0000000003154 | CYPA422   | [109475336]e9f9p_00172959.1 | [109475336]e9f9p_00172959.1 | PREDICTED: similar to Cytochrome P450 A42 precursor (CYPA42) | 38             | 395            | 48       | 504    | 57832 | 8.8 | RatNoHM_MJMV_PK_103.007070.007070.2 | 2.298   | 3.1333 | 1447.149 | 1446.1  | 1   | 75       | 2          | KMEDKSLSEDLRAE.V        | 204      | 2                 |         |        |
| 142 | ENSNGS00000162365.ENSUSG00000002827.15.ENSNRN0000000003154 | CYPA422   | [109475336]e9f9p_00172959.1 | [109475336]e9f9p_00172959.1 | PREDICTED: similar to Cytochrome P450 A42 precursor (CYPA42) | 38             | 395            | 48       | 504    | 57832 | 8.8 | RatNoHM_MJMV_PK_103.007070.007070.2 | 2.298   | 3.1333 | 1447.149 | 1446.1  | 1   | 75       | 2          | KMEDKSLSEDLRAE.V        | 204      | 2                 |         |        |
| 142 | ENSNGS00000162365.ENSUSG00000002827.15.ENSNRN0000000003154 | CYPA422   | [109475336]e9f9p_00172959.1 | [109475336]e9f9p_00172959.1 | PREDICTED: similar to Cytochrome P450 A42 precursor (CYPA42) | 38             | 395            | 48       | 504    | 57832 | 8.8 | RatNoHM_MJMV_PK_103.007070.007070.2 | 2.298   | 3.1333 | 1447.149 | 1446.1  | 1   | 75       | 2          | KMEDKSLSEDLRAE.V        | 204      | 2                 |         |        |
| 142 | ENSNGS00000162365.ENSUSG00000002827.15.ENSNRN0000000003154 | CYPA422   | [109475336]e9f9p_00172959.1 | [109475336]e9f9p_00172959.1 | PREDICTED: similar to Cytochrome P450 A42 precursor (CYPA42) | 38             | 395            | 48       | 504    | 57832 | 8.8 | RatNoHM_MJMV_PK_103.007070.007070.2 | 2.298   | 3.1333 | 1447.149 | 1446.1  | 1   | 75       | 2          | KMEDKSLSEDLRAE.V        | 204      | 2                 |         |        |
| 142 | ENSNGS00000162365.ENSUSG00000002827.15.ENSNRN0000000003154 | CYPA422   | [109475336]e9f9p_00172959.1 | [109475336]e9f9p_00172959.1 | PREDICTED: similar to Cytochrome P450 A42 precursor (CYPA42) | 38             | 395            | 48       | 504    | 57832 | 8.8 | RatNoHM_MJMV_PK_103.007070.007070.2 | 2.298   | 3.1333 | 1447.149 | 1446.1  | 1   | 75       | 2          | KMEDKSLSEDLRAE.V        | 204      | 2                 |         |        |
| 142 | ENSNGS00000162365.ENSUSG00000002827.15.ENSNRN0000000003154 | CYPA422   | [109475336]e9f9p_00172959.1 | [109475336]e9f9p_00172959.1 | PREDICTED: similar to Cytochrome P450 A42 precursor (CYPA42) | 38             | 395            | 48       | 504    | 57832 | 8.8 | RatNoHM_MJMV_PK_103.007070.007070.2 | 2.298   | 3.1333 | 1447.149 | 1446.1  | 1   | 75       | 2          | KMEDKSLSEDLRAE.V        | 204      | 2                 |         |        |

210



[illegible]

[illegible]

214

| rk  | ORTHO_GROUPS                                        | Gene_Name | Locus | Proteins In Group           | Description                                                                | Sequence Count | Spectrum Count | Coverage | Length | MW     | pI     | Match                | X Z                | CC     | DotIM  | NH+    | Calc   | Ion      | Proportion | Count | Sequence                   | Position              | Tryptic | Unique |   |
|-----|-----------------------------------------------------|-----------|-------|-----------------------------|----------------------------------------------------------------------------|----------------|----------------|----------|--------|--------|--------|----------------------|--------------------|--------|--------|--------|--------|----------|------------|-------|----------------------------|-----------------------|---------|--------|---|
| 176 | ENSG00000177728:ENSGUS00000202147:ENSGN00000004032  | KIA0195   |       | [g109483359epXP_21119.4]    | PREDICTED: similar to Progenin KIA0195 (Transmembrane protein)             | 1              | 1              | 1.89     | 138    | 10.532 | 5.1    | 116.010888.010888.3  | 3.2594             | 0.2219 | 2887   | 2.1    | 26     | 1        | 26         | 1     | R.GKQKDEELLEGLEPPPPSPSPR.G | 202                   | 27      | 1      |   |
| 177 | NALNA:ENSG00000002897                               | LOC286989 |       | [g12754412epXP_775445.1]    | UDP-glucuronyltransferase (Rattus norvegicus)                              | 4              | 6              | 6        | 630    | 80089  | 8.3    | 61.084000.010796.1   | 3.2536             | 0.2208 | 1047   | 10.952 | 2      | 17.22222 | 2          | 2     | 2                          | R.GVEVTVLPSPS.G       | 50      | 1      | 1 |
| 178 | NALNA:ENSG00000002899                               | LOC286989 |       | [g12754412epXP_775445.1]    | UDP-glucuronyltransferase (Rattus norvegicus)                              | 4              | 6              | 6        | 630    | 80089  | 8.3    | 61.084000.010796.1   | 3.2536             | 0.2208 | 1047   | 10.952 | 2      | 17.22222 | 2          | 2     | 2                          | R.GVEVTVLPSPS.G       | 50      | 1      | 1 |
| 179 | NALNA:ENSG00000002897                               | LOC286989 |       | [g12754412epXP_775445.1]    | UDP-glucuronyltransferase (Rattus norvegicus)                              | 4              | 6              | 6        | 630    | 80089  | 8.3    | 61.084000.010796.1   | 3.2536             | 0.2208 | 1047   | 10.952 | 2      | 17.22222 | 2          | 2     | 2                          | R.GVEVTVLPSPS.G       | 50      | 1      | 1 |
| 180 | ENSG00000144342:ENSGUS00000003183:ENSGN000000021726 | TLR3      |       | [g18454312epXP_942086.1]    | tol-like receptor 3 (Rattus norvegicus)                                    | 1              | 2              | 2        | 1,905  | 103175 | 7.9    | 61.04001781.071291.2 | 4.3866             | 0.2817 | 2255   | 2257.4 | 1      | 50       | 2          | 1     | R.DLKLNGELEGLEGQEWG.R      | 436                   | 27      | 1      |   |
| 181 | ENSG00000146029:ENSGUS00000001569NA                 | NLR1      |       | [g104720209epXP_1005917.1]  | PREDICTED: similar to nucleolar protein with MPF4 domain 1 (Rt)            | 1              | 1              | 1        | 1      | 914    | 102166 | 8.8                  | 61.084000.010796.1 | 2.8825 | 0.1979 | 1256   | 1257.5 | 3        | 3          | 3     | R.GGKQVPPAPAPG.S           | 49                    | 0       | 1      |   |
| 182 | ENSG00000198231:ENSGUS00000002765:ENSGN000000000474 | CDK42     |       | [g104602719epXP_10181952.1] | PREDICTED: similar to cyclin dependent kinase 4 (Rattus norvegicus)        | 1              | 1              | 1        | 1      | 1      | 1      | 1                    | 1                  | 1      | 1      | 1      | 1      | 1        | 1          | 1     | 1                          | R.DLKLNGELEGLEGQEWG.R | 436     | 27     | 1 |
| 183 | ENSG00000139026:ENSGUS00000004841:ENSGN000000008016 | CKAP4     |       | [g10447177epXP_1007945.1]   | PREDICTED: similar to cyclotactin-associated protein 4 (Rattus norvegicus) | 1              | 2              | 2        | 1      | 2      | 2      | 2                    | 2                  | 2      | 2      | 2      | 2      | 2        | 2          | 2     | 2                          | R.DLKLNGELEGLEGQEWG.R | 436     | 27     | 1 |
| 184 | ENSG00000171781:ENSGUS00000004043:ENSGN000000000041 | CDK42     |       | [g104602719epXP_10181952.1] | PREDICTED: similar to cyclin dependent kinase 4 (Rattus norvegicus)        | 1              | 1              | 1        | 1      | 1      | 1      | 1                    | 1                  | 1      | 1      | 1      | 1      | 1        | 1          | 1     | 1                          | R.DLKLNGELEGLEGQEWG.R | 436     | 27     | 1 |
| 185 | ENSG00000177225:ENSGUS00000004043:ENSGN000000008016 | COR10H    |       | [g10447177epXP_1007945.1]   | PREDICTED: similar to cyclotactin-associated protein 4 (Rattus norvegicus) | 1              | 1              | 1        | 1      | 1      | 1      | 1                    | 1                  | 1      | 1      | 1      | 1      | 1        | 1          | 1     | 1                          | R.DLKLNGELEGLEGQEWG.R | 436     | 27     | 1 |
| 186 | ENSG00000115812:ENSGUS00000002193:ENSGN000000000001 | CDK42     |       | [g104602719epXP_10181952.1] | PREDICTED: similar to cyclin dependent kinase 4 (Rattus norvegicus)        | 1              | 1              | 1        | 1      | 1      | 1      | 1                    | 1                  | 1      | 1      | 1      | 1      | 1        | 1          | 1     | 1                          | R.DLKLNGELEGLEGQEWG.R | 436     | 27     | 1 |
| 187 | ENSG00000138115:ENSGUS00000007231:ENSGN000000030061 | CYP2C8    |       | [g148620209epXP_219933.2]   | PREDICTED: similar to cytochrome P450, family 2, subfamily c, p1           | 8              | 19             | 12.9     | 490    | 56169  | 7.6    | 61.084000.010796.1   | 3.1128             | 0.1402 | 1056   | 1057.3 | 37     | 37.80093 | 1          | 1     | 1                          | R.DLKLNGELEGLEGQEWG.R | 436     | 27     | 1 |
| 188 | ENSG00000138115:ENSGUS00000007231:ENSGN000000030061 | CYP2C8    |       | [g148620209epXP_219933.2]   | PREDICTED: similar to cytochrome P450, family 2, subfamily c, p1           | 8              | 19             | 12.9     | 490    | 56169  | 7.6    | 61.084000.010796.1   | 3.1128             | 0.1402 | 1056   | 1057.3 | 37     | 37.80093 | 1          | 1     | 1                          | R.DLKLNGELEGLEGQEWG.R | 436     | 27     | 1 |
| 189 | ENSG00000138115:ENSGUS00000007231:ENSGN000000030061 | CYP2C8    |       | [g148620209epXP_219933.2]   | PREDICTED: similar to cytochrome P450, family 2, subfamily c, p1           | 8              | 19             | 12.9     | 490    | 56169  | 7.6    | 61.084000.010796.1   | 3.1128             | 0.1402 | 1056   | 1057.3 | 37     | 37.80093 | 1          | 1     | 1                          | R.DLKLNGELEGLEGQEWG.R | 436     | 27     | 1 |
| 190 | ENSG00000138115:ENSGUS00000007231:ENSGN000000030061 | CYP2C8    |       | [g148620209epXP_219933.2]   | PREDICTED: similar to cytochrome P450, family 2, subfamily c, p1           | 8              | 19             | 12.9     | 490    | 56169  | 7.6    | 61.084000.010796.1   | 3.1128             | 0.1402 | 1056   | 1057.3 | 37     | 37.80093 | 1          | 1     | 1                          | R.DLKLNGELEGLEGQEWG.R | 436     | 27     | 1 |
| 191 | ENSG00000138115:ENSGUS00000007231:ENSGN000000030061 | CYP2C8    |       | [g148620209epXP_219933.2]   | PREDICTED: similar to cytochrome P450, family 2, subfamily c, p1           | 8              | 19             | 12.9     | 490    | 56169  | 7.6    | 61.084000.010796.1   | 3.1128             | 0.1402 | 1056   | 1057.3 | 37     | 37.80093 | 1          | 1     | 1                          | R.DLKLNGELEGLEGQEWG.R | 436     | 27     | 1 |
| 192 | ENSG00000138115:ENSGUS00000007231:ENSGN000000030061 | CYP2C8    |       | [g148620209epXP_219933.2]   | PREDICTED: similar to cytochrome P450, family 2, subfamily c, p1           | 8              | 19             | 12.9     | 490    | 56169  | 7.6    | 61.084000.010796.1   | 3.1128             | 0.1402 | 1056   | 1057.3 | 37     | 37.80093 | 1          | 1     | 1                          | R.DLKLNGELEGLEGQEWG.R | 436     | 27     | 1 |
| 193 | ENSG00000138115:ENSGUS00000007231:ENSGN000000030061 | CYP2C8    |       | [g148620209epXP_219933.2]   | PREDICTED: similar to cytochrome P450, family 2, subfamily c, p1           | 8              | 19             | 12.9     | 490    | 56169  | 7.6    | 61.084000.010796.1   | 3.1128             | 0.1402 | 1056   | 1057.3 | 37     | 37.80093 | 1          | 1     | 1                          | R.DLKLNGELEGLEGQEWG.R | 436     | 27     | 1 |
| 194 | ENSG00000138115:ENSGUS00000007231:ENSGN000000030061 | CYP2C8    |       | [g148620209epXP_219933.2]   | PREDICTED: similar to cytochrome P450, family 2, subfamily c, p1           | 8              | 19             | 12.9     | 490    | 56169  | 7.6    | 61.084000.010796.1   | 3.1128             | 0.1402 | 1056   | 1057.3 | 37     | 37.80093 | 1          | 1     | 1                          | R.DLKLNGELEGLEGQEWG.R | 436     | 27     | 1 |
| 195 | ENSG00000138115:ENSGUS00000007231:ENSGN000000030061 | CYP2C8    |       | [g148620209epXP_219933.2]   | PREDICTED: similar to cytochrome P450, family 2, subfamily c, p1           | 8              | 19             | 12.9     | 490    | 56169  | 7.6    | 61.084000.010796.1   | 3.1128             | 0.1402 | 1056   | 1057.3 | 37     | 37.80093 | 1          | 1     | 1                          | R.DLKLNGELEGLEGQEWG.R | 436     | 27     | 1 |
| 196 | ENSG00000138115:ENSGUS00000007231:ENSGN000000030061 | CYP2C8    |       | [g148620209epXP_219933.2]   | PREDICTED: similar to cytochrome P450, family 2, subfamily c, p1           | 8              | 19             | 12.9     | 490    | 56169  | 7.6    | 61.084000.010796.1   | 3.1128             | 0.1402 | 1056   | 1057.3 | 37     | 37.80093 | 1          | 1     | 1                          | R.DLKLNGELEGLEGQEWG.R | 436     | 27     | 1 |
| 197 | ENSG00000138115:ENSGUS00000007231:ENSGN000000030061 | CYP2C8    |       | [g148620209epXP_219933.2]   | PREDICTED: similar to cytochrome P450, family 2, subfamily c, p1           | 8              | 19             | 12.9     | 490    | 56169  | 7.6    | 61.084000.010796.1   | 3.1128             | 0.1402 | 1056   | 1057.3 | 37     | 37.80093 | 1          | 1     | 1                          | R.DLKLNGELEGLEGQEWG.R | 436     | 27     | 1 |
| 198 | ENSG00000138115:ENSGUS00000007231:ENSGN000000030061 | CYP2C8    |       | [g148620209epXP_219933.2]   | PREDICTED: similar to cytochrome P450, family 2, subfamily c, p1           | 8              | 19             | 12.9     | 490    | 56169  | 7.6    | 61.084000.010796.1   | 3.1128             | 0.1402 | 1056   | 1057.3 | 37     | 37.80093 | 1          | 1     | 1                          | R.DLKLNGELEGLEGQEWG.R | 436     | 27     | 1 |
| 199 | ENSG00000138115:ENSGUS00000007231:ENSGN000000030061 | CYP2C8    |       | [g148620209epXP_219933.2]   | PREDICTED: similar to cytochrome P450, family 2, subfamily c, p1           | 8              | 19             | 12.9     | 490    | 56169  | 7.6    | 61.084000.010796.1   | 3.1128             | 0.1402 | 1056   | 1057.3 | 37     | 37.80093 | 1          | 1     | 1                          | R.DLKLNGELEGLEGQEWG.R | 436     | 27     | 1 |
| 200 | ENSG00000138115:ENSGUS00000007231:ENSGN000000030061 | CYP2C8    |       | [g148620209epXP_219933.2]   | PREDICTED: similar to cytochrome P450, family 2, subfamily c, p1           | 8              | 19             | 12.9     | 490    | 56169  | 7.6    | 61.084000.010796.1   | 3.1128             | 0.1402 | 1056   | 1057.3 | 37     | 37.80093 | 1          | 1     | 1                          | R.DLKLNGELEGLEGQEWG.R | 436     | 27     | 1 |
| 201 | ENSG00000138115:ENSGUS00000007231:ENSGN000000030061 | CYP2C8    |       | [g148620209epXP_219933.2]   | PREDICTED: similar to cytochrome P450, family 2, subfamily c, p1           | 8              | 19             | 12.9     | 490    | 56169  | 7.6    | 61.084000.010796.1   | 3.1128             | 0.1402 | 1056   | 1057.3 | 37     | 37.80093 | 1          | 1     | 1                          | R.DLKLNGELEGLEGQEWG.R | 436     | 27     | 1 |
| 202 | ENSG00000138115:ENSGUS00000007231:ENSGN000000030061 | CYP2C8    |       | [g148620209epXP_219933.2]   | PREDICTED: similar to cytochrome P450, family 2, subfamily c, p1           | 8              | 19             | 12.9     | 490    | 56169  | 7.6    | 61.084000.010796.1   | 3.1128             | 0.1402 | 1056   | 1057.3 | 37     | 37.80093 | 1          | 1     | 1                          | R.DLKLNGELEGLEGQEWG.R | 436     | 27     | 1 |
| 203 | ENSG00000138115:ENSGUS00000007231:ENSGN000000030061 | CYP2C8    |       | [g148620209epXP_219933.2]   | PREDICTED: similar to cytochrome P450, family 2, subfamily c, p1           | 8              | 19             | 12.9     | 490    | 56169  | 7.6    | 61.084000.010796.1   | 3.1128             | 0.1402 | 1056   | 1057.3 | 37     | 37.80093 | 1          | 1     | 1                          | R.DLKLNGELEGLEGQEWG.R | 436     | 27     | 1 |
| 204 | ENSG00000138115:ENSGUS00000007231:ENSGN000000030061 | CYP2C8    |       | [g148620209epXP_219933.2]   | PREDICTED: similar to cytochrome P450, family 2, subfamily c, p1           | 8              | 19             | 12.9     | 490    | 56169  | 7.6    | 61.084000.010796.1   | 3.1128             | 0.1402 | 1056   | 1057.3 | 37     | 37.80093 | 1          | 1     | 1                          | R.DLKLNGELEGLEGQEWG.R | 436     | 27     | 1 |
| 205 | ENSG00000138115:ENSGUS00000007231:ENSGN000000030061 | CYP2C8    |       | [g148620209epXP_219933.2]   | PREDICTED: similar to cytochrome P450, family 2, subfamily c, p1           | 8              | 19             | 12.9     | 490    | 56169  | 7.6    | 61.084000.010796.1   | 3.1128             | 0.1402 | 1056   | 1057.3 | 37     | 37.80093 | 1          | 1     | 1                          | R.DLKLNGELEGLEGQEWG.R | 436     | 27     | 1 |
| 206 | ENSG00000138115:ENSGUS00000007231:ENSGN000000030061 | CYP2C8    |       | [g148620209epXP_219933.2]   | PREDICTED: similar to cytochrome P450, family 2, subfamily c, p1           | 8              | 19             | 12.9     | 490    | 56169  | 7.6    | 61.084000.010796.1   | 3.1128             | 0.1402 | 1056   | 1057.3 | 37     | 37.80093 | 1          | 1     | 1                          | R.DLKLNGELEGLEGQEWG.R | 436     | 27     | 1 |
| 207 | ENSG00000138115:ENSGUS00000007231:ENSGN000000030061 | CYP2C8    |       | [g148620209epXP_219933.2]   | PREDICTED: similar to cytochrome P450, family 2, subfamily c, p1           | 8              | 19             | 12.9     | 490    | 56169  | 7.6    | 61.084000.010796.1   | 3.1128             | 0.1402 | 1056   | 1057.3 | 37     | 37.80093 | 1          | 1     | 1                          | R.DLKLNGELEGLEGQEWG.R | 436     | 27     | 1 |
| 208 | ENSG00000138115:ENSGUS00000007231:ENSGN000000030061 | CYP2C8    |       | [g148620209epXP_219933.2]   | PREDICTED: similar to cytochrome P450, family 2, subfamily c, p1           | 8              | 19             | 12.9     | 490    | 56169  | 7.6    | 61.084000.010796.1   | 3.1128             | 0.1402 | 1056   | 1057.3 | 37     | 37.80093 | 1          | 1     | 1                          | R.DLKLNGELEGLEGQEWG.R | 436     | 27     | 1 |
| 209 | ENSG00000138115:ENSGUS00000007231:ENSGN000000030061 | CYP2C8    |       | [g148620209epXP_219933.2]   | PREDICTED: similar to cytochrome P450, family 2, subfamily c, p1           | 8              | 19             | 12.9     | 490    | 56169  | 7.6    | 61.084000.010796.1   | 3.1128             | 0.1402 | 1056   | 1057.3 | 37     | 37.80093 | 1          | 1     | 1                          | R.DLKLNGELEGLEGQEWG.R | 436     | 27     | 1 |
| 210 | ENSG00000138115:ENSGUS00000007231:ENSGN000000030061 | CYP2C8    |       | [g148620209epXP_219933.2]   | PREDICTED: similar to cytochrome P450, family 2, subfamily c, p1           | 8              | 19             | 12.9     | 490    | 56169  | 7.6    | 61.084000.010796.1   | 3.1128             | 0.1402 | 1056   | 1057.3 | 37     | 37.80093 | 1          | 1     | 1                          | R.DLKLNGELEGLEGQEWG.R | 436     | 27     | 1 |
| 211 | ENSG00000138115:ENSGUS00000007231:ENSGN000000030061 | CYP2C8    |       | [g148620209epXP_219933.2]   | PREDICTED: similar to cytochrome P450, family 2, subfamily c, p1           | 8              | 19             | 12.9     | 490    | 56169  | 7.6    | 61.084000.010796.1   | 3.1128             | 0.1402 | 1056   | 1057.3 | 37     | 37.80093 | 1          | 1     | 1                          | R.DLKLNGELEGLEGQEWG.R | 436     | 27     | 1 |
| 212 | ENSG00000138115:ENSGUS00000007231:ENSGN000000030061 | CYP2C8    |       | [g148620209epXP_219933.2]   | PREDICTED: similar to cytochrome P450, family 2, subfamily c, p1           | 8              | 19             | 12.9     | 490    | 56169  | 7.6    | 61.084000.010796.1   | 3.1128             | 0.1402 | 1056   | 1057.3 | 37     | 37.80093 | 1          | 1     | 1                          | R.DLKLNGELEGLEGQEWG.R | 436     | 27     | 1 |
| 213 | ENSG00000138115:ENSGUS00000007231:ENSGN000000030061 | CYP2C8    |       | [g148620209epXP_219933.2]   | PREDICTED: similar to cytochrome P450, family 2, subfamily c, p1           | 8              | 19             | 12.9     | 490    | 56169  | 7.6    | 61.084000.010796.1   | 3.1128             | 0.1402 | 1056   | 1057.3 | 37     | 37.80093 | 1          | 1     | 1                          | R.DLKLNGELEGLEGQEWG.R | 436     | 27     | 1 |
| 214 | ENSG00000138115:ENSGUS00000007231:ENSGN000000030061 | CYP2C8    |       | [g148620209epXP_219933.2]   | PREDICTED: similar to cytochrome P450, family 2, subfamily c, p1           | 8              | 19             | 12.9     | 490    | 56169  | 7.6    | 61.084000.010796.1   | 3.1128             | 0.1402 | 1056   | 1057.3 | 37     | 37.80093 | 1          | 1     | 1                          | R.DLKLNGELEGLEGQEWG.R | 436     | 27     | 1 |
| 215 | ENSG00000138115:ENSGUS00000007231:ENSGN000000030061 | CYP2C8    |       | [g148620209epXP_219933.2]   | PREDICTED: similar to cytochrome P450, family 2, subfamily c, p1           | 8              | 19             | 12.9     | 490    | 56169  | 7.6    | 61.084000.010796.1   | 3.1128             | 0.1402 | 1      |        |        |          |            |       |                            |                       |         |        |   |

| rk   | ORTHO_GROUPS | GENE_NAME | Locus | Proteins In Group           | Description                 | Sequence Count | Spectrum Count | Coverage | Length | MW | pI | MatchID | Z XCOR | DetCN   | M+H <sup>+</sup> | CalcM   | Ion    | Proportion | Count     | Sequence                 | Sequence Position                          | Trypic | Unique |  |
|------|--------------|-----------|-------|-----------------------------|-----------------------------|----------------|----------------|----------|--------|----|----|---------|--------|---------|------------------|---------|--------|------------|-----------|--------------------------|--------------------------------------------|--------|--------|--|
| 1842 |              |           |       | Contaminant_g746301 g757957 | Contaminant_g746301 g757957 |                |                |          |        |    |    |         | 2      | 4.642   | 4.067            | 2077.3  | +      | 01.11111   | 3         | R.DONFAGATAHHPNVAEK      | 137                                        | 2      |        |  |
| 1842 |              |           |       | Contaminant_g746301 g757957 | Contaminant_g746301 g757957 |                |                |          |        |    |    |         | 2      | 5.11248 | 4.443            | 1905.5  | 1905.1 | 0.555557   | 2         | S.GVETPSSSSGYSPKPKV      | 186                                        | 1      |        |  |
| 1842 |              |           |       | Contaminant_g746301 g757957 | Contaminant_g746301 g757957 |                |                |          |        |    |    |         | 2      | 5.10284 | 4.438            | 1938    | 1937   | 0.555557   | 2         | A.SGVETPSSSSGYSPKPKV     | 186                                        | 1      |        |  |
| 1842 |              |           |       | Contaminant_g746301 g757957 | Contaminant_g746301 g757957 |                |                |          |        |    |    |         | 2      | 4.4898  | 4.048            | 1905.5  | 1905.1 | 0.555557   | 2         | S.GVETPSSSSGYSPKPKV      | 186                                        | 1      |        |  |
| 1842 |              |           |       | Contaminant_g746301 g757957 | Contaminant_g746301 g757957 |                |                |          |        |    |    |         | 2      | 5.10284 | 4.438            | 1938    | 1937   | 0.555557   | 2         | R.VLQGLHGSPSSCATGADSYGYR | 205                                        | 2      |        |  |
| 1842 |              |           |       | Contaminant_g746301 g757957 | Contaminant_g746301 g757957 |                |                |          |        |    |    |         | 3      | 3.0571  | 3.348            | 2611.88 | 2611.7 | 0.29       | 166666    | 1                        | R.VLQGLHGSPSSCATGADSYGYR                   | 205    | 2      |  |
| 1842 |              |           |       | Contaminant_g746301 g757957 | Contaminant_g746301 g757957 |                |                |          |        |    |    |         | 2      | 4.3967  | 4.039            | 1938    | 1937   | 0.555557   | 2         | A.SGVETPSSSSGYSPKPKV     | 186                                        | 1      |        |  |
| 1842 |              |           |       | Contaminant_g746301 g757957 | Contaminant_g746301 g757957 |                |                |          |        |    |    |         | 2      | 4.7165  | 4.342            | 1938    | 1937   | 0.555557   | 2         | A.SGVETPSSSSGYSPKPKV     | 186                                        | 1      |        |  |
| 1842 |              |           |       | Contaminant_g746301 g757957 | Contaminant_g746301 g757957 |                |                |          |        |    |    |         | 3      | 4.4854  | 4.043            | 1979    | 1979   | 0.15       | 15.27391  | 8                        | R.HSHVATGSENGATGSHVFWQAQSGVETPSSSSGYSPKPKV | 157    | 2      |  |
| 1842 |              |           |       | Contaminant_g746301 g757957 | Contaminant_g746301 g757957 |                |                |          |        |    |    |         | 3      | 3.689   | 3.718            | 2078    | 2078   | 0.3        | 10.27778  | 3                        | R.DONFAGATAHHPNVAEK                        | 137    | 2      |  |
| 1842 |              |           |       | Contaminant_g746301 g757957 | Contaminant_g746301 g757957 |                |                |          |        |    |    |         | 3      | 3.4859  | 3.188            | 2612    | 2612   | 0.6        | 25        | 4                        | R.VLQGLHGSPSSCATGADSYGYR                   | 205    | 2      |  |
| 1842 |              |           |       | Contaminant_g746301 g757957 | Contaminant_g746301 g757957 |                |                |          |        |    |    |         | 3      | 4.1432  | 3.907            | 2029    | 2029   | 0.1        | 41.66032  | 2                        | R.VLQGLHGSPSSCATGADSYGYR                   | 205    | 2      |  |
| 1842 |              |           |       | Contaminant_g746301 g757957 | Contaminant_g746301 g757957 |                |                |          |        |    |    |         | 3      | 3.3841  | 3.1947           | 2077    | 2077   | 0.3        | 50        | 2                        | R.DONFAGATAHHPNVAEK                        | 137    | 2      |  |
| 1842 |              |           |       | Contaminant_g746301 g757957 | Contaminant_g746301 g757957 |                |                |          |        |    |    |         | 2      | 4.4611  | 4.345            | 1937    | 1937   | 0.1        | 43.75     | 2                        | R.VLQGLHGSPSSCATGADSYGYR                   | 205    | 2      |  |
| 1842 |              |           |       | Contaminant_g746301 g757957 | Contaminant_g746301 g757957 |                |                |          |        |    |    |         | 3      | 3.1832  | 3.2913           | 2011    | 2011   | 0.2        | 30        | 2                        | R.VLQGLHGSPSSCATGADSYGYR                   | 205    | 2      |  |
| 1842 |              |           |       | Contaminant_g746301 g757957 | Contaminant_g746301 g757957 |                |                |          |        |    |    |         | 3      | 3.1088  | 3.1923           | 2768    | 2767   | 0.3        | 30.00002  | 1                        | R.VLQGLHGSPSSCATGADSYGYR                   | 204    | 2      |  |
| 1842 |              |           |       | Contaminant_g746301 g757957 | Contaminant_g746301 g757957 |                |                |          |        |    |    |         | 3      | 3.2286  | 3.4691           | 2024    | 2049   | 0.2        | 50        | 2                        | R.DONFAGATAHHPNVAEK                        | 137    | 2      |  |
| 1842 |              |           |       | Contaminant_g746301 g757957 | Contaminant_g746301 g757957 |                |                |          |        |    |    |         | 3      | 3.4726  | 3.303            | 2471    | 2471   | 0.18       | 26.66668  | 5                        | R.ATNAASFTLLENTANPAWFLPWAGWDR              | 107    | 2      |  |
| 1842 |              |           |       | Contaminant_g746301 g757957 | Contaminant_g746301 g757957 |                |                |          |        |    |    |         | 3      | 3.8126  | 3.278            | 2078    | 2078   | 0.2        | 47.22222  | 5                        | R.DONFAGATAHHPNVAEK                        | 137    | 2      |  |
| 1842 |              |           |       | Contaminant_g746301 g757957 | Contaminant_g746301 g757957 |                |                |          |        |    |    |         | 3      | 4.4117  | 4.054            | 1979    | 1979   | 0.2        | 17.93472  | 3                        | R.HSHVATGSENGATGSHVFWQAQSGVETPSSSSGYSPKPKV | 157    | 2      |  |
| 1842 |              |           |       | Contaminant_g746301 g757957 | Contaminant_g746301 g757957 |                |                |          |        |    |    |         | 3      | 3.5888  | 3.184            | 2027    | 2028   | 0.2        | 27.00002  | 1                        | R.LSDWDAAGTAGQFGLDSTTPPV                   | 244    | 2      |  |
| 1842 |              |           |       | Contaminant_g746301 g757957 | Contaminant_g746301 g757957 |                |                |          |        |    |    |         | 3      | 3.4736  | 3.207            | 2029    | 2029   | 0.2        | 30        | 4                        | R.VLQGLHGSPSSCATGADSYGYR                   | 205    | 2      |  |
| 1842 |              |           |       | Contaminant_g746301 g757957 | Contaminant_g746301 g757957 |                |                |          |        |    |    |         | 3      | 3.508   | 3.321            | 2231    | 2231   | 0.3        | 39.47596  | 2                        | R.DONFAGATAHHPNVAEK                        | 137    | 2      |  |
| 1842 |              |           |       | Contaminant_g746301 g757957 | Contaminant_g746301 g757957 |                |                |          |        |    |    |         | 2      | 3.5545  | 3.282            | 1420    | 1425   | 0.5        | 69.23074  | 4                        | R.VLQGLHGSPSSCATGADSYGYR                   | 205    | 2      |  |
| 1842 |              |           |       | Contaminant_g746301 g757957 | Contaminant_g746301 g757957 |                |                |          |        |    |    |         | 2      | 3.3778  | 3.2691           | 2077    | 2078   | 0.3        | 30        | 4                        | R.DONFAGATAHHPNVAEK                        | 137    | 2      |  |
| 1842 |              |           |       | Contaminant_g746301 g757957 | Contaminant_g746301 g757957 |                |                |          |        |    |    |         | 2      | 2.8748  | 3.403            | 1920    | 1921   | 0.1        | 67.64708  | 16                       | R.DONFAGATAHHPNVAEK                        | 138    | 2      |  |
| 1842 |              |           |       | Contaminant_g746301 g757957 | Contaminant_g746301 g757957 |                |                |          |        |    |    |         | 3      | 3.1874  | 3.479            | 2014    | 2015   | 0.1        | 47.22222  | 2                        | R.DONFAGATAHHPNVAEK                        | 137    | 2      |  |
| 1842 |              |           |       | Contaminant_g746301 g757957 | Contaminant_g746301 g757957 |                |                |          |        |    |    |         | 2      | 2.7946  | 3.455            | 1871    | 1871   | 0.1        | 61.11111  | 14                       | R.VLQGLHGSPSSCATGADSYGYR                   | 205    | 2      |  |
| 1842 |              |           |       | Contaminant_g746301 g757957 | Contaminant_g746301 g757957 |                |                |          |        |    |    |         | 3      | 3.3792  | 3.074            | 2078    | 2073   | 0.3        | 60        | 2                        | R.DONFAGATAHHPNVAEK                        | 137    | 2      |  |
| 1842 |              |           |       | Contaminant_g746301 g757957 | Contaminant_g746301 g757957 |                |                |          |        |    |    |         | 3      | 3.2831  | 3.452            | 3158    | 3156   | 0.1        | 34.82758  | 5                        | R.ATNAASFTLLENTANPAWFLPWAGWDR              | 107    | 2      |  |
| 1842 |              |           |       | Contaminant_g746301 g757957 | Contaminant_g746301 g757957 |                |                |          |        |    |    |         | 2      | 3.6841  | 3.431            | 2078    | 2073   | 0.3        | 55.55557  | 5                        | R.DONFAGATAHHPNVAEK                        | 138    | 2      |  |
| 1842 |              |           |       | Contaminant_g746301 g757957 | Contaminant_g746301 g757957 |                |                |          |        |    |    |         | 2      | 3.595   | 3.189            | 1873    | 1871   | 0.1        | 68.88889  | 3                        | R.VLQGLHGSPSSCATGADSYGYR                   | 205    | 2      |  |
| 1842 |              |           |       | Contaminant_g746301 g757957 | Contaminant_g746301 g757957 |                |                |          |        |    |    |         | 2      | 3.6955  | 3.483            | 1918    | 1921   | 0.1        | 64.70589  | 12                       | R.DONFAGATAHHPNVAEK                        | 138    | 2      |  |
| 1842 |              |           |       | Contaminant_g746301 g757957 | Contaminant_g746301 g757957 |                |                |          |        |    |    |         | 3      | 3.4054  | 3.494            | 2292    | 2314   | 0.2        | 64.33332  | 4                        | R.APDSSSSANGDGSACDGTAVRA                   | 107    | 2      |  |
| 1842 |              |           |       | Contaminant_g746301 g757957 | Contaminant_g746301 g757957 |                |                |          |        |    |    |         | 2      | 2.9452  | 3.047            | 1421    | 1425   | 0.1        | 69.23074  | 1                        | R.VLQGLHGSPSSCATGADSYGYR                   | 205    | 2      |  |
| 1842 |              |           |       | Contaminant_g746301 g757957 | Contaminant_g746301 g757957 |                |                |          |        |    |    |         | 3      | 3.403   | 3.424            | 2023    | 2024   | 0.1        | 64.70589  | 12                       | R.APDSSSSANGDGSACDGTAVRA                   | 107    | 2      |  |
| 1842 |              |           |       | Contaminant_g746301 g757957 | Contaminant_g746301 g757957 |                |                |          |        |    |    |         | 2      | 4.4811  | 4.07             | 1923    | 1925   | 0.1        | 61.76476  | 14                       | R.DONFAGATAHHPNVAEK                        | 138    | 2      |  |
| 1842 |              |           |       | Contaminant_g746301 g757957 | Contaminant_g746301 g757957 |                |                |          |        |    |    |         | 2      | 4.4918  | 4.288            | 2233    | 2233   | 0.1        | 67.98474  | 3                        | R.DONFAGATAHHPNVAEK                        | 137    | 2      |  |
| 1842 |              |           |       | Contaminant_g746301 g757957 | Contaminant_g746301 g757957 |                |                |          |        |    |    |         | 3      | 3.2939  | 3.426            | 2028    | 2029   | 0.2        | 50        | 2                        | R.VLQGLHGSPSSCATGADSYGYR                   | 205    | 2      |  |
| 1842 |              |           |       | Contaminant_g746301 g757957 | Contaminant_g746301 g757957 |                |                |          |        |    |    |         | 3      | 3.583   | 3.427            | 3471    | 3471   | 0.18       | 29.66666  | 4                        | R.ATNAASFTLLENTANPAWFLPWAGWDR              | 107    | 2      |  |
| 1842 |              |           |       | Contaminant_g746301 g757957 | Contaminant_g746301 g757957 |                |                |          |        |    |    |         | 3      | 3.63    | 3.424            | 2023    | 2024   | 0.1        | 64.70589  | 12                       | R.APDSSSSANGDGSACDGTAVRA                   | 107    | 2      |  |
| 1842 |              |           |       | Contaminant_g746301 g757957 | Contaminant_g746301 g757957 |                |                |          |        |    |    |         | 2      | 4.3521  | 3.562            | 2027    | 2027   | 0.2        | 40.789474 | 6                        | R.VLQGLHGSPSSCATGADSYGYR                   | 204    | 2      |  |
| 1842 |              |           |       | Contaminant_g746301 g757957 | Contaminant_g746301 g757957 |                |                |          |        |    |    |         | 3      | 3.7953  | 3.459            | 1879    | 1871   | 0.1        | 69.23074  | 15                       | R.VLQGLHGSPSSCATGADSYGYR                   | 205    | 2      |  |
| 1842 |              |           |       | Contaminant_g746301 g757957 | Contaminant_g746301 g757957 |                |                |          |        |    |    |         | 3      | 3.4278  | 3.408            | 1923    | 1921   | 0.1        | 67.5      | 2                        | R.VLQGLHGSPSSCATGADSYGYR                   | 205    | 2      |  |
| 1842 |              |           |       | Contaminant_g746301 g757957 | Contaminant_g746301 g757957 |                |                |          |        |    |    |         | 2      | 4.7012  | 4.346            | 2271    | 2235   | 0.1        | 50        | 2                        | R.DONFAGATAHHPNVAEK                        | 137    | 2      |  |
| 1842 |              |           |       | Contaminant_g746301 g757957 | Contaminant_g746301 g757957 |                |                |          |        |    |    |         | 3      | 3.6425  | 3.477            | 2317    | 2317   | 0.16       | 30.12113  | 10                       | R.ATNAASFTLLENTANPAWFLPWAGWDR              | 107    | 2      |  |
| 1842 |              |           |       | Contaminant_g746301 g757957 | Contaminant_g746301 g757957 |                |                |          |        |    |    |         | 2      | 5.2628  | 3.511            | 3337    | 3316   | 0.1        | 29.31045  | 1                        | R.ATNAASFTLLENTANPAWFLPWAGWDR              | 107    | 2      |  |
| 1842 |              |           |       | Contaminant_g746301 g757957 | Contaminant_g746301 g757957 |                |                |          |        |    |    |         | 3      | 4.4424  | 4.007            | 1923    | 1925   | 0.1        | 64.00004  | 3                        | R.VLQGLHGSPSSCATGADSYGYR                   | 205    | 2      |  |
| 1842 |              |           |       | Contaminant_KERATN03        | Contaminant_KERATN03        |                |                |          |        |    |    |         | 5      | 5.8773  | 5.307            | 3556    | 3516   | 0.1        | 35.53848  | 4                        | K.TIDLNKGNLLTANMALLGNL                     | 202    | 2      |  |
| 1842 |              |           |       | Contaminant_KERATN03        | Contaminant_KERATN03        |                |                |          |        |    |    |         | 5      | 5.138   | 5.089            | 3339    | 3346   | 0.1        | 47.5      | 8                        | R.VLQGLHGSPSSCATGADSYGYR                   | 205    | 2      |  |
| 1842 |              |           |       | Contaminant_KERATN03        | Contaminant_KERATN03        |                |                |          |        |    |    |         | 5      | 4.4853  | 3.873            | 2403    | 2354   | 0.1        | 40.38413  | 1                        | K.TIDLNKGNLLTANMALLGNL                     | 202    | 2      |  |
| 1842 |              |           |       | Contaminant_KERATN03        | Contaminant_KERATN03        |                |                |          |        |    |    |         | 5      | 5.9531  | 4.253            | 2703    | 2473   | 0.1        | 61.36336  | 8                        | R.VLQGLHGSPSSCATGADSYGYR                   | 204    | 2      |  |
| 1842 |              |           |       | Contaminant_KERATN03        | Contaminant_KERATN03        |                |                |          |        |    |    |         | 5      | 5.9519  | 5.282            | 3079    | 3079   | 0.1        | 47.5      | 8                        | R.VLQGLHGSPSSCATGADSYGYR                   | 205    | 2      |  |
| 1842 |              |           |       | Contaminant_KERATN03        | Contaminant_KERATN03        |                |                |          |        |    |    |         | 5      | 5.9519  | 5.282            | 3079    | 3079   | 0.1        | 47.5      | 8                        | R.VLQGLHGSPSSCATGADSYGYR                   | 205    | 2      |  |
| 1842 |              |           |       | Contaminant_KERATN03        | Contaminant_KERATN03        |                |                |          |        |    |    |         | 5      | 5.9519  | 5.282            | 3079    | 3079   | 0.1        | 47.5      | 8                        | R.VLQGLHGSPSSCATGADSYGYR                   | 205    | 2      |  |
| 1842 |              |           |       | Contaminant_KERATN03        | Contaminant_KERATN03        |                |                |          |        |    |    |         | 5      | 5.9519  | 5.282            | 3079    | 3079   | 0.1        | 47.5      | 8                        | R.VLQGLHGSPSSCATGADSYGYR                   | 205    | 2      |  |
| 1842 |              |           |       | Contaminant_KERATN03        | Contaminant_KERATN03        |                |                |          |        |    |    |         | 5      | 5.9519  | 5.282            | 3079    | 3079   | 0.1        | 47.5      | 8                        | R.VLQGLHGSPSSCATGADSYGYR                   | 205    | 2      |  |
| 1842 |              |           |       | Contaminant_KERATN03        | Contaminant_KERATN03        |                |                |          |        |    |    |         | 5      | 5.9519  | 5.282            | 3079    | 3079   | 0.1        | 47.5      | 8                        | R.VLQGLHGSPSSCATGADSYGYR                   | 205    | 2      |  |
| 1842 |              |           |       | Contaminant_KERATN03        | Contaminant_KERATN03        |                |                |          |        |    |    |         | 5      | 5.9519  | 5.282            | 3079    | 3079   | 0.1        | 47.5      | 8                        | R.VLQGLHGSPSSCATGADSYGYR                   | 205    | 2      |  |
| 1842 |              |           |       | Contaminant_KERATN03        | Contaminant_KERATN03        |                |                |          |        |    |    |         | 5      | 5.9519  | 5.282            | 3079    | 3079   | 0.1        | 47.5      | 8                        | R.VLQGLHGSPSSCATGADSYGYR                   | 205    | 2      |  |
| 1842 |              |           |       | Contaminant_KERATN03        |                             |                |                |          |        |    |    |         |        |         |                  |         |        |            |           |                          |                                            |        |        |  |



| rk       | ORTHO_GROUPS | GENE_NAME                          | Locus | Proteins In Group | Description    | Sequence Count | Spectrum Count | Coverage | Length | MW     | pI                                     | MatchID                                | Z      | XC     | DotCM  | MH++ | CalcM  | Ion    | SPRk     | Proportion | Count           | Sequence                                 | Sequence Position                    | Tryptic   | Unique          |                                          |                                      |      |   |   |
|----------|--------------|------------------------------------|-------|-------------------|----------------|----------------|----------------|----------|--------|--------|----------------------------------------|----------------------------------------|--------|--------|--------|------|--------|--------|----------|------------|-----------------|------------------------------------------|--------------------------------------|-----------|-----------------|------------------------------------------|--------------------------------------|------|---|---|
| SHUFFLED |              | SHUFFLED_010494121296PK_01070268.1 |       |                   | FALSE POSITIVE | 1              | 2              | 2        | 1591   | 167353 | 5.9                                    | RhNoChc_MM_Jive_PK_104.023772.023772.3 | 3      | 3.7414 | 0.1711 | 3621 | 26     | 3623.8 | 1        | 24.193548  | 1               | V.ERTSEICVAVGEGDEHMMWVPSQVEDVM           | 1                                    | 24.193548 | 1               | V.ERTSEICVAVGEGDEHMMWVPSQVEDVM           | 1502                                 | 0    | * |   |
| SHUFFLED |              | SHUFFLED_010494121296PK_01070268.1 |       |                   | FALSE POSITIVE | 1              | 2              | 2        | 1591   | 167353 | 5.9                                    | RhNoChc_MM_Jive_PK_212.014523.014523.3 | 3      | 3.8802 | 0.1618 | 3622 | 07     | 3623.8 | 1        | 22.86045   | 1               | V.ERTSEICVAVGEGDEHMMWVPSQVEDVM           | 1                                    | 22.86045  | 1               | V.ERTSEICVAVGEGDEHMMWVPSQVEDVM           | 1302                                 | 0    | * |   |
| SHUFFLED |              | SHUFFLED_010494137396PK_01070280.1 |       |                   | FALSE POSITIVE | 1              | 2              | 3.4      | 760    | 81504  | 1.1                                    | RhNoChc_MM_Jive_T_210.013073.013073.3  | 3      | 3.2415 | 0.1524 | 2748 | 02     | 2748.3 | 4        | 26.1126    | 2               | R.GDRNNSDQALLNTEPTFAWKEE                 | 4                                    | 26.1126   | 2               | R.GDRNNSDQALLNTEPTFAWKEE                 | 439                                  | 2    | * |   |
| SHUFFLED |              | SHUFFLED_010494393596PK_0121384.1  |       |                   | FALSE POSITIVE | 2              | 4              | 2        | 2499   | 265268 | 6.1                                    | RhNoChc_MM_Jive_PK_207.010565.010565.3 | 3      | 3.7319 | 0.2105 | 3372 | 83     | 3372.6 | 2        | 20.967741  | 1               | L.ASQTSADSTHNSKTIQIALHSDGGQTKV           | 2                                    | 20.967741 | 1               | L.ASQTSADSTHNSKTIQIALHSDGGQTKV           | 330                                  | 0    | * |   |
| SHUFFLED |              | SHUFFLED_010494393596PK_0121384.1  |       |                   | FALSE POSITIVE | 2              | 4              | 2        | 2499   | 265268 | 6.1                                    | RhNoChc_MM_Jive_T_300.017230.017230.3  | 2      | 3.1318 | 0.1729 | 1884 | 17     | 1884.2 | 2        | 31.7236    | 3               | R.LTGGSDVPTGQVSGTGKTL                    | 2                                    | 31.7236   | 3               | R.LTGGSDVPTGQVSGTGKTL                    | 2306                                 | 0    | * |   |
| SHUFFLED |              | SHUFFLED_010494443396PK_01071070.1 |       |                   | FALSE POSITIVE | 1              | 2              | 0.6      | 2025   | 221840 | 6.9                                    | RhNoChc_MM_Jive_PK_205.021695.021695.2 | 2      | 2.829  | 0.206  | 1441 | 09     | 1441.7 | 1        | 62.5       | 2               | K.PRIVGNTSLLEF                           | 1                                    | 62.5      | 2               | K.PRIVGNTSLLEF                           | 351                                  | 1    | * |   |
| SHUFFLED |              | SHUFFLED_010494473596PK_01060336.1 |       |                   | FALSE POSITIVE | 2              | 2              | 1.5      | 4126   | 472078 | 7.4                                    | RhNoChc_MM_Jive_T_107.002590.002590.3  | 3      | 3.9168 | 0.2084 | 4070 | 69     | 4073.6 | 3        | 3          | 17.6            | 1                                        | R.MLSBINEKREKQVRSYRVEQASMTSLTKVKDGRW | 1         | 17.6            | 1                                        | R.MLSBINEKREKQVRSYRVEQASMTSLTKVKDGRW | 1722 | 2 | * |
| SHUFFLED |              | SHUFFLED_010494473596PK_01060336.1 |       |                   | FALSE POSITIVE | 2              | 2              | 1.5      | 4126   | 472078 | 7.4                                    | RhNoChc_MM_Jive_T_311.011773.011773.2  | 2      | 2.4126 | 0.0881 | 2345 | 59     | 2346.7 | 5        | 34.210206  | 1               | R.ETNRGLKZONLZSLVPL                      | 1                                    | 34.210206 | 1               | R.ETNRGLKZONLZSLVPL                      | 96                                   | 2    | * |   |
| SHUFFLED |              | SHUFFLED_010494513596PK_01060336.1 |       |                   | FALSE POSITIVE | 2              | 2              | 1.9      | 2519   | 274189 | 7                                      | RhNoChc_MM_Jive_T_406.001499.001499.2  | 2      | 2.1845 | 0.1024 | 2053 | 81     | 2056.1 | 5        | 39.166606  | 1               | K.RPPLSLHSPTNGPKVKAALPMESG               | 1                                    | 39.166606 | 1               | K.RPPLSLHSPTNGPKVKAALPMESG               | 1731                                 | 2    | * |   |
| SHUFFLED |              | SHUFFLED_010494603136PK_0134199.1  |       |                   | FALSE POSITIVE | 2              | 2              | 1.9      | 2519   | 274189 | 7                                      | RhNoChc_MM_Jive_PK_102.023434.023434.3 | 2      | 2.4092 | 0.2017 | 1431 | 21     | 1431.3 | 3        | 39.714287  | 1               | T.PKADNPREFASSGSGSGGLNLR                 | 1                                    | 39.714287 | 1               | T.PKADNPREFASSGSGSGGLNLR                 | 2148                                 | 0    | * |   |
| SHUFFLED |              | SHUFFLED_010494852496PK_01054040.1 |       |                   | FALSE POSITIVE | 2              | 2              | 7.7      | 600    | 66450  | 8.7                                    | RhNoChc_MM_Jive_PK_101.010845.010845.2 | 3      | 3.1629 | 0.1894 | 1562 | 97     | 1566.1 | 8        | 19.354837  | 1               | K.APAVLSNNWVGSGTKVKNPRDOONNSIAGPLVN      | 1                                    | 19.354837 | 1               | K.APAVLSNNWVGSGTKVKNPRDOONNSIAGPLVN      | 54                                   | 0    | * |   |
| SHUFFLED |              | SHUFFLED_010494852496PK_01054040.1 |       |                   | FALSE POSITIVE | 2              | 2              | 7.7      | 600    | 66450  | 8.7                                    | RhNoChc_MM_Jive_T_102.023434.023434.3  | 2      | 2.409  | 0.1894 | 1562 | 97     | 1566.1 | 8        | 19.354837  | 1               | V.EDYTSYKALR                             | 1                                    | 19.354837 | 1               | V.EDYTSYKALR                             | 11                                   | 0    | * |   |
| SHUFFLED |              | SHUFFLED_010494941996PK_01074324.1 |       |                   | FALSE POSITIVE | 2              | 2              | 20.5     | 220    | 23988  | 8.7                                    | RhNoChc_MM_Jive_PK_204.001798.001798.3 | 3      | 3.5352 | 0.1509 | 2590 | 33     | 2593.5 | 5        | 25.961538  | 1               | K.DPGLLKLEGGASGLNPKFKEDRPRH              | 1                                    | 25.961538 | 1               | K.DPGLLKLEGGASGLNPKFKEDRPRH              | 61                                   | 2    | * |   |
| SHUFFLED |              | SHUFFLED_010494941996PK_01074324.1 |       |                   | FALSE POSITIVE | 2              | 2              | 20.5     | 220    | 23988  | 8.7                                    | RhNoChc_MM_Jive_T_207.002056.002056.2  | 2      | 2.1434 | 0.0861 | 2331 | 19     | 2331.5 | 5        | 35.264117  | 1               | I.RLGFRRSRNLTGLFLCHLI                    | 1                                    | 35.264117 | 1               | I.RLGFRRSRNLTGLFLCHLI                    | 81                                   | 2    | * |   |
| SHUFFLED |              | SHUFFLED_010500227736PK_01000717.1 |       |                   | FALSE POSITIVE | 2              | 2              | 1.2      | 1462   | 170504 | 6.6                                    | RhNoChc_MM_Jive_T_208.013731.013731.2  | 2      | 1.4305 | 0.1497 | 2088 | 01     | 2088.3 | 4        | 46.875     | 1               | R.MRNRLSELSLMEGRW                        | 1                                    | 46.875    | 1               | R.MRNRLSELSLMEGRW                        | 1468                                 | 2    | * |   |
| SHUFFLED |              | SHUFFLED_010500227736PK_01000717.1 |       |                   | FALSE POSITIVE | 2              | 2              | 1.4      | 3506   | 391705 | 6.8                                    | RhNoChc_MM_Jive_T_114.020152.020152.3  | 3      | 3.1016 | 0.1917 | 1420 | 19     | 1441.1 | 1        | 19.94595   | 1               | K.NLFSSELISIEGTPYQVLPRTKRIRKSDVLRFLQLRDR | 1                                    | 19.94595  | 1               | K.NLFSSELISIEGTPYQVLPRTKRIRKSDVLRFLQLRDR | 18                                   | 2    | * |   |
| SHUFFLED |              | SHUFFLED_010500227736PK_01000717.1 |       |                   | FALSE POSITIVE | 2              | 2              | 1.4      | 3506   | 391705 | 6.8                                    | RhNoChc_MM_Jive_PK_102.023434.023434.3 | 2      | 2.3412 | 0.1272 | 1320 | 67     | 1321.4 | 3        | 63.63694   | 1               | K.NMYGLNLTQDQ                            | 1                                    | 63.63694  | 1               | K.NMYGLNLTQDQ                            | 1468                                 | 2    | * |   |
| SHUFFLED |              | SHUFFLED_010500303936PK_01054811.1 |       |                   | FALSE POSITIVE | 3              | 3              | 0.3      | 9445   | 969997 | 67                                     | RhNoChc_MM_Jive_PK_101.010845.010845.2 | 2      | 3.1039 | 0.2065 | 1371 | 136    | 1368.6 | 1        | 70.83333   | 3               | A.EAVCTAIPGRS                            | 3                                    | 70.83333  | 3               | A.EAVCTAIPGRS                            | 3721                                 | 1    | * |   |
| SHUFFLED |              | SHUFFLED_010500303936PK_01054811.1 |       |                   | FALSE POSITIVE | 2              | 2              | 1.6      | 400    | 55044  | 6.2                                    | RhNoChc_MM_Jive_T_105.002733.002733.3  | 3      | 3.3476 | 0.1413 | 2875 | 82     | 2877.2 | 1        | 30.434762  | 3               | R.VWRVLTMLVKNDSQDTEMLRKA                 | 3                                    | 30.434762 | 3               | R.VWRVLTMLVKNDSQDTEMLRKA                 | 226                                  | 2    | * |   |
| SHUFFLED |              | SHUFFLED_010500303936PK_01054811.1 |       |                   | FALSE POSITIVE | 2              | 2              | 1.6      | 2716   | 300126 | 6.2                                    | RhNoChc_MM_Jive_PK_110.016229.016229.3 | 3      | 3.9191 | 0.2594 | 2837 | 18     | 2840   | 1        | 25         | 1               | D.SHEGCDMSVFLVVGESPGCILEST               | 1                                    | 25        | 1               | D.SHEGCDMSVFLVVGESPGCILEST               | 2545                                 | 0    | * |   |
| SHUFFLED |              | SHUFFLED_010500303936PK_01054811.1 |       |                   | FALSE POSITIVE | 2              | 2              | 1.6      | 2716   | 300126 | 6.2                                    | RhNoChc_MM_Jive_T_209.013050.013050.2  | 2      | 2.9773 | 0.0968 | 2002 | 97     | 2004.3 | 1        | 55.25      | 1               | R.SPQLSCHMZLNILNR                        | 1                                    | 55.25     | 1               | R.SPQLSCHMZLNILNR                        | 2197                                 | 2    | * |   |
| SHUFFLED |              | SHUFFLED_010500306396PK_01070760.1 |       |                   | FALSE POSITIVE | 1              | 3              | 0.4      | 3969   | 453369 | 5.8                                    | RhNoChc_MM_Jive_PK_101.013484.013484.2 | 2      | 2.8736 | 0.1536 | 1722 | 61     | 1723.8 | 2        | 69.230774  | 2               | D.DLEETSKEMALRE                          | 2                                    | 69.230774 | 2               | D.DLEETSKEMALRE                          | 1400                                 | 0    | * |   |
| SHUFFLED |              | SHUFFLED_010500306396PK_01070760.1 |       |                   | FALSE POSITIVE | 1              | 3              | 0.4      | 3969   | 453369 | 5.8                                    | RhNoChc_MM_Jive_PK_204.009798.009798.2 | 2      | 2.2568 | 0.1848 | 1723 | 79     | 1723.8 | 2        | 65.38461   | 1               | D.DLEETSKEMALRE                          | 1                                    | 65.38461  | 1               | D.DLEETSKEMALRE                          | 1400                                 | 0    | * |   |
| SHUFFLED |              | SHUFFLED_010500307396PK_01060219.1 |       |                   | FALSE POSITIVE | 1              | 3              | 0.6      | 904    | 100588 | 6.9                                    | RhNoChc_MM_Jive_T_406.010503.010503.3  | 3      | 3.5468 | 0.1953 | 2354 | 35     | 2326.6 | 1        | 26.089595  | 1               | K.DGVGPTPLSRRLNLSNEDLTPR                 | 1                                    | 26.089595 | 1               | K.DGVGPTPLSRRLNLSNEDLTPR                 | 718                                  | 2    | * |   |
| SHUFFLED |              | SHUFFLED_010500307396PK_01060219.1 |       |                   | FALSE POSITIVE | 2              | 2              | 6        | 904    | 100588 | 6.9                                    | RhNoChc_MM_Jive_PK_207.001317.001317.3 | 3      | 3.5468 | 0.1953 | 2354 | 35     | 2326.6 | 1        | 23.275862  | 1               | GLTSLADHPHPPVTEPPQDQGVSLVGT              | 1                                    | 23.275862 | 1               | GLTSLADHPHPPVTEPPQDQGVSLVGT              | 476                                  | 0    | * |   |
| SHUFFLED |              | SHUFFLED_010500474596PK_01000592.1 |       |                   | FALSE POSITIVE | 2              | 2              | 0.5      | 1820   | 203088 | 6.4                                    | RhNoChc_MM_Jive_T_301.005625.005625.2  | 2      | 2.2736 | 0.1138 | 1182 | 51     | 1181.4 | 8        | 66.66667   | 2               | R.KVVRVDRKXV                             | 2                                    | 66.66667  | 2               | R.KVVRVDRKXV                             | 1303                                 | 2    | * |   |
| SHUFFLED |              | SHUFFLED_010500584896PK_01000609.1 |       |                   | FALSE POSITIVE | 1              | 3              | 0.9      | 459    | 50677  | 6.8                                    | RhNoChc_MM_Jive_T_413.016486.016486.2  | 3      | 3.5663 | 0.1634 | 1860 | 87     | 1975.1 | 2        | 44.11765   | 2               | R.STOPCDZMAGLSVLSERL                     | 2                                    | 44.11765  | 2               | R.STOPCDZMAGLSVLSERL                     | 33                                   | 2    | * |   |
| SHUFFLED |              | SHUFFLED_010500584896PK_01000609.1 |       |                   | FALSE POSITIVE | 1              | 3              | 0.5      | 4728   | 541205 | 6.1                                    | RhNoChc_MM_Jive_T_408.024038.024038.2  | 2      | 2.1319 | 0.187  | 2672 | 99     | 2671.9 | 2        | 34.09008   | 2               | K.ALAESNHDSKXKIDEDQLVK                   | 2                                    | 34.09008  | 2               | K.ALAESNHDSKXKIDEDQLVK                   | 3183                                 | 2    | * |   |
| SHUFFLED |              | SHUFFLED_010500584896PK_01000609.1 |       |                   | FALSE POSITIVE | 1              | 3              | 0.5      | 4728   | 541205 | 6.1                                    | RhNoChc_MM_Jive_T_310.017465.017465.2  | 2      | 2.6134 | 0.1172 | 2070 | 09     | 2071.9 | 2        | 34.09008   | 2               | K.ALAESNHDSKXKIDEDQLVK                   | 2                                    | 34.09008  | 2               | K.ALAESNHDSKXKIDEDQLVK                   | 3183                                 | 2    | * |   |
| SHUFFLED |              | SHUFFLED_010501001776PK_01006950.1 |       |                   | FALSE POSITIVE | 1              | 2              | 1.2      | 1071   | 119419 | 6.2                                    | RhNoChc_MM_Jive_PK_107.012720.012720.2 | 2      | 2.8408 | 0.2435 | 1502 | 45     | 1502.8 | 3        | 58.333332  | 2               | G.HVELLETGLYLLK                          | 2                                    | 58.333332 | 2               | G.HVELLETGLYLLK                          | 677                                  | 1    | * |   |
| SHUFFLED |              | SHUFFLED_010501001776PK_01006950.1 |       |                   | FALSE POSITIVE | 2              | 2              | 1405     | 138713 | 8.3    | RhNoChc_MM_Jive_PK_113.009062.009062.2 | 2                                      | 2.5609 | 0.163  | 1272   | 46   | 1272.4 | 9      | 50       | 1          | P.ALLOTTPGSRPSV | 1                                        | 50                                   | 1         | P.ALLOTTPGSRPSV | 1336                                     | 0                                    | *    |   |   |
| SHUFFLED |              | SHUFFLED_010501001776PK_01006950.1 |       |                   | FALSE POSITIVE | 2              | 2              | 1405     | 138713 | 8.3    | RhNoChc_MM_Jive_PK_203.013137.013137.2 | 2                                      | 2.9478 | 0.1663 | 1273   | 127  | 1274.1 | 1      | 65.38461 | 1          | M.OPFALGGGAVK   | 1                                        | 65.38461                             | 1         | M.OPFALGGGAVK   | 101                                      | 1                                    | *    |   |   |
| SHUFFLED |              | SHUFFLED_010501001776PK_01006950.1 |       |                   | FALSE POSITIVE | 2              | 2              | 1.6      | 2554   | 290225 | 6.8                                    | RhNoChc_MM_Jive_T_413.004955.004955.3  | 3      | 3.0621 | 0.0807 | 1162 | 11     | 1190.6 | 1        | 28         | 1               | K.AAPSYHYVTEGRDPRDPMVWFRQ                | 1                                    | 28        | 1               | K.AAPSYHYVTEGRDPRDPMVWFRQ                | 1790                                 | 2    | * |   |
| SHUFFLED |              | SHUFFLED_010501144496PK_01005971.1 |       |                   | FALSE POSITIVE | 2              | 2              | 1.6      | 2554   | 290225 | 6.8                                    | RhNoChc_MM_Jive_PK_209.011621.011621.2 | 2      | 2.8478 | 0.1628 | 1899 | 65     | 1892.2 | 2        | 43.333332  | 1               | F.OLEGPSTLDLWLLT                         | 1                                    | 43.333332 | 1               | F.OLEGPSTLDLWLLT                         | 798                                  | 0    | * |   |
| SHUFFLED |              | SHUFFLED_010503283596PK_01006119.1 |       |                   | FALSE POSITIVE | 2              | 2              | 4.1      | 754    | 73563  | 9.6                                    | RhNoChc_MM_Jive_PK_203.012753.012753.2 | 2      | 2.8758 | 0.1726 | 1281 | 63     | 1275.5 | 3        | 58.333332  | 1               | G.OAVPKSAKKGV                            | 1                                    | 58.333332 | 1               | G.OAVPKSAKKGV                            | 418                                  | 0    | * |   |
| SHUFFLED |              | SHUFFLED_010503283596PK_01006119.1 |       |                   | FALSE POSITIVE | 2              | 2              | 4.1      | 754    | 73563  | 9.6                                    | RhNoChc_MM_Jive_T_311.014037.014037.2  | 2      | 2.3364 | 0.1448 | 1725 | 29     | 1725.4 | 4        | 53.333336  | 1               | K.QALMAAPRSKSSP                          | 1                                    | 53.333336 | 1               | K.QALMAAPRSKSSP                          | 679                                  | 2    | * |   |
| SHUFFLED |              | SHUFFLED_010504284996PK_0106270.1  |       |                   | FALSE POSITIVE | 2              | 2              | 2.5      | 561    | 62189  | 9.9                                    | RhNoChc_MM_Jive_PK_204.011883.011883.2 | 2      | 2.848  | 0.1965 | 1483 | 51     | 1482.8 | 1        | 61.538464  | 2               | I.WMLAGVPGGLV                            | 2                                    | 61        |                 |                                          |                                      |      |   |   |



|  |  |  |  |
|--|--|--|--|
|  |  |  |  |
|--|--|--|--|



## MM

[illegible]



|  |  |  |  |
|--|--|--|--|
|  |  |  |  |
|--|--|--|--|

[illegible]



## MMs

| 1 | 2 | 3 | 4 | 5 | 6 | 7 | 8 | 9 | 10 | 11 | 12 | 13 | 14 | 15 | 16 | 17 | 18 | 19 | 20 | 21 | 22 | 23 | 24 | 25 | 26 | 27 | 28 | 29 | 30 | 31 | 32 | 33 | 34 | 35 | 36 | 37 | 38 | 39 | 40 | 41 | 42 | 43 | 44 | 45 | 46 | 47 | 48 | 49 | 50 | 51 | 52 | 53 | 54 | 55 | 56 | 57 | 58 | 59 | 60 | 61 | 62 | 63 | 64 | 65 | 66 | 67 | 68 | 69 | 70 | 71 | 72 | 73 | 74 | 75 | 76 | 77 | 78 | 79 | 80 | 81 | 82 | 83 | 84 | 85 | 86 | 87 | 88 | 89 | 90 | 91 | 92 | 93 | 94 | 95 | 96 | 97 | 98 | 99 | 100 | 101 | 102 | 103 | 104 | 105 | 106 | 107 | 108 | 109 | 110 | 111 | 112 | 113 | 114 | 115 | 116 | 117 | 118 | 119 | 120 | 121 | 122 | 123 | 124 | 125 | 126 | 127 | 128 | 129 | 130 | 131 | 132 | 133 | 134 | 135 | 136 | 137 | 138 | 139 | 140 | 141 | 142 | 143 | 144 | 145 | 146 | 147 | 148 | 149 | 150 | 151 | 152 | 153 | 154 | 155 | 156 | 157 | 158 | 159 | 160 | 161 | 162 | 163 | 164 | 165 | 166 | 167 | 168 | 169 | 170 | 171 | 172 | 173 | 174 | 175 | 176 | 177 | 178 | 179 | 180 | 181 | 182 | 183 | 184 | 185 | 186 | 187 | 188 | 189 | 190 | 191 | 192 | 193 | 194 | 195 | 196 | 197 | 198 | 199 | 200 | 201 | 202 | 203 | 204 | 205 | 206 | 207 | 208 | 209 | 210 | 211 | 212 | 213 | 214 | 215 | 216 | 217 | 218 | 219 | 220 | 221 | 222 | 223 | 224 | 225 | 226 | 227 | 228 | 229 | 230 | 231 | 232 | 233 | 234 | 235 | 236 | 237 | 238 | 239 | 240 | 241 | 242 | 243 | 244 | 245 | 246 | 247 | 248 | 249 | 250 | 251 | 252 | 253 | 254 | 255 | 256 | 257 | 258 | 259 | 260 | 261 | 262 | 263 | 264 | 265 | 266 | 267 | 268 | 269 | 270 | 271 | 272 | 273 | 274 | 275 | 276 | 277 | 278 | 279 | 280 | 281 | 282 | 283 | 284 | 285 | 286 | 287 | 288 | 289 | 290 | 291 | 292 | 293 | 294 | 295 | 296 | 297 | 298 | 299 | 300 | 301 | 302 | 303 | 304 | 305 | 306 | 307 | 308 | 309 | 310 | 311 | 312 | 313 | 314 | 315 | 316 | 317 | 318 | 319 | 320 | 321 | 322 | 323 | 324 | 325 | 326 | 327 | 328 | 329 | 330 | 331 | 332 | 333 | 334 | 335 | 336 | 337 | 338 | 339 | 340 | 341 | 342 | 343 | 344 | 345 | 346 | 347 | 348 | 349 | 350 | 351 | 352 | 353 | 354 | 355 | 356 | 357 | 358 | 359 | 360 | 361 | 362 | 363 | 364 | 365 | 366 | 367 | 368 | 369 | 370 | 371 | 372 | 373 | 374 | 375 | 376 | 377 | 378 | 379 | 380 | 381 | 382 | 383 | 384 | 385 | 386 | 387 | 388 | 389 | 390 | 391 | 392 | 393 | 394 | 395 | 396 | 397 | 398 | 399 | 400 | 401 | 402 | 403 | 404 | 405 | 406 | 407 | 408 | 409 | 410 | 411 | 412 | 413 | 414 | 415 | 416 | 417 | 418 | 419 | 420 | 421 | 422 | 423 | 424 | 425 | 426 | 427 | 428 | 429 | 430 | 431 | 432 | 433 | 434 | 435 | 436 | 437 | 438 | 439 | 440 | 441 | 442 | 443 | 444 | 445 | 446 | 447 | 448 | 449 | 450 | 451 | 452 | 453 | 454 | 455 | 456 | 457 | 458 | 459 | 460 | 461 | 462 | 463 | 464 | 465 | 466 | 467 | 468 | 469 | 470 | 471 | 472 | 473 | 474 | 475 | 476 | 477 | 478 | 479 | 480 | 481 | 482 | 483 | 484 | 485 | 486 | 487 | 488 | 489 | 490 | 491 | 492 | 493 | 494 | 495 | 496 | 497 | 498 | 499 | 500 | 501 | 502 | 503 | 504 | 505 | 506 | 507 | 508 | 509 | 510 | 511 | 512 | 513 | 514 | 515 | 516 | 517 | 518 | 519 | 520 | 521 | 522 | 523 | 524 | 525 | 526 | 527 | 528 | 529 | 530 | 531 | 532 | 533 | 534 | 535 | 536 | 537 | 538 | 539 | 540 | 541 | 542 | 543 | 544 | 545 | 546 | 547 | 548 | 549 | 550 | 551 | 552 | 553 | 554 | 555 | 556 | 557 | 558 | 559 | 560 | 561 | 562 | 563 | 564 | 565 | 566 | 567 | 568 | 569 | 570 | 571 | 572 | 573 | 574 | 575 | 576 | 577 | 578 | 579 | 580 | 581 | 582 | 583 | 584 | 585 | 586 | 587 | 588 | 589 | 590 | 591 | 592 | 593 | 594 | 595 | 596 | 597 | 598 | 599 | 600 | 601 | 602 | 603 | 604 | 605 | 606 | 607 | 608 | 609 | 610 | 611 | 612 | 613 | 614 | 615 | 616 | 617 | 618 | 619 | 620 | 621 | 622 | 623 | 624 | 625 | 626 | 627 | 628 | 629 | 630 | 631 | 632 | 633 | 634 | 635 | 636 | 637 | 638 | 639 | 640 | 641 | 642 | 643 | 644 | 645 | 646 | 647 | 648 | 649 | 650 | 651 | 652 | 653 | 654 | 655 | 656 | 657 | 658 | 659 | 660 | 661 | 662 | 663 | 664 | 665 | 666 | 667 | 668 | 669 | 670 | 671 | 672 | 673 | 674 | 675 | 676 | 677 | 678 | 679 | 680 | 681 | 682 | 683 | 684 | 685 | 686 | 687 | 688 | 689 | 690 | 691 | 692 | 693 | 694 | 695 | 696 | 697 | 698 | 699 | 700 | 701 | 702 | 703 | 704 | 705 | 706 | 707 | 708 | 709 | 710 | 711 | 712 | 713 | 714 | 715 | 716 | 717 | 718 | 719 | 720 | 721 | 722 | 723 | 724 | 725 | 726 | 727 | 728 | 729 | 730 | 731 | 732 | 733 | 734 | 735 | 736 | 737 | 738 | 739 | 740 | 741 | 742 | 743 | 744 | 745 | 746 | 747 | 748 | 749 | 750 | 751 | 752 | 753 | 754 | 755 | 756 | 757 | 758 | 759 | 760 | 761 | 762 | 763 | 764 | 765 | 766 | 767 | 768 | 769 | 770 | 771 | 772 | 773 | 774 | 775 | 776 | 777 | 778 | 779 | 780 | 781 | 782 | 783 | 784 | 785 | 786 | 787 | 788 | 789 | 790 | 791 | 792 | 793 | 794 | 795 | 796 | 797 | 798 | 799 | 800 | 801 | 802 | 803 | 804 | 805 | 806 | 807 | 808 | 809 | 810 | 811 | 812 | 813 | 814 | 815 | 816 | 817 | 818 | 819 | 820 | 821 | 822 | 823 | 824 | 825 | 826 | 827 | 828 | 829 | 830 | 831 | 832 | 833 | 834 | 835 | 836 | 837 | 838 | 839 | 840 | 841 | 842 | 843 | 844 | 845 | 846 | 847 | 848 | 849 | 850 | 851 | 852 | 853 | 854 | 855 | 856 | 857 | 858 | 859 | 860 | 861 | 862 | 863 | 864 | 865 | 866 | 867 | 868 | 869 | 870 | 871 | 872 | 873 | 874 | 875 | 876 | 877 | 878 | 879 | 880 | 881 | 882 | 883 | 884 | 885 | 886 | 887 | 888 | 889 | 890 | 891 | 892 | 893 | 894 | 895 | 896 | 897 | 898 | 899 | 900 | 901 | 902 | 903 | 904 | 905 | 906 | 907 | 908 | 909 | 910 | 911 | 912 | 913 | 914 | 915 | 916 | 917 | 918 | 919 | 920 | 921 | 922 | 923 | 924 | 925 | 926 | 927 | 928 | 929 | 930 | 931 | 932 | 933 | 934 | 935 | 936 | 937 | 938 | 939 | 940 | 941 | 942 | 943 | 944 | 945 | 946 | 947 | 948 | 949 | 950 | 951 | 952 | 953 | 954 | 955 | 956 | 957 | 958 | 959 | 960 | 961 | 962 | 963 | 964 | 965 | 966 | 967 | 968 | 969 | 970 | 971 | 972 | 973 | 974 | 975 | 976 | 977 | 978 | 979 | 980 | 981 | 982 | 983 | 984 | 985 | 986 | 987 | 988 | 989 | 990 | 991 | 992 | 993 | 994 | 995 | 996 | 997 | 998 | 999 | 1000 | 1001 | 1002 | 1003 | 1004 | 1005 | 1006 | 1007 | 1008 | 1009 | 1010 | 1011 | 1012 | 1013 | 1014 | 1015 | 1016 | 1017 | 1018 | 1019 | 1020 | 1021 | 1022 | 1023 | 1024 | 1025 | 1026 | 1027 | 1028 | 1029 | 1030 | 1031 | 1032 | 1033 | 1034 | 1035 | 1036 | 1037 | 1038 | 1039 | 1040 | 1041 | 1042 | 1043 | 1044 | 1045 | 1046 | 1047 | 1048 | 1049 | 1050 | 1051 | 1052 | 1053 | 1054 | 1055 | 1056 | 1057 | 1058 | 1059 | 1060 | 1061 | 1062 | 1063 | 1064 | 1065 | 1066 | 1067 | 1068 | 1069 | 1070 | 1071 | 1072 | 1073 | 1074 | 1075 | 1076 | 1077 | 1078 | 1079 | 1080 | 1081 | 1082 | 1083 | 1084 | 1085 | 1086 | 1087 | 1088 | 1089 | 1090 | 1091 | 1092 | 1093 | 1094 | 1095 | 1096 | 1097 | 1098 | 1099 | 1100 | 1101 | 1102 | 1103 | 1104 | 1105 | 1106 | 1107 | 1108 | 1109 | 1110 | 1111 | 1112 | 1113 | 1114 | 1115 | 1116 | 1117 | 1118 | 1119 | 1120 | 1121 | 1122 | 1123 | 1124 | 1125 | 1126 | 1127 | 1128 | 1129 | 1130 | 1131 | 1132 | 1133 | 1134 | 1135 | 1136 | 1137 | 1138 | 1139 | 1140 | 1141 | 1142 | 1143 | 1144 | 1145 | 1146 | 1147 | 1148 | 1149 | 1150 | 1151 | 1152 | 1153 | 1154 | 1155 | 1156 | 1157 | 1158 | 1159 | 1160 | 1161 | 1162 | 1163 | 1164 | 1165 | 1166 | 1167 | 1168 | 1169 | 1170 | 1171 | 1172 | 1173 | 1174 | 1175 | 1176 | 1177 | 1178 | 1179 | 1180 | 1181 | 1182 | 1183 | 1184 | 1185 | 1186 | 1187 | 1188 | 1189 | 1190 | 1191 | 1192 | 1193 | 1194 | 1195 | 1196 | 1197 | 1198 | 1199 | 1200 | 1201 | 1202 | 1203 | 1204 | 1205 | 1206 | 1207 | 1208 | 1209 | 1210 | 1211 | 1212 | 1213 | 1214 | 1215 | 1216 | 1217 | 1218 | 1219 | 1220 | 1221 | 1222 | 1223 | 1224 | 1225 | 1226 | 1227 | 1228 | 1229 | 1230 | 1231 | 1232 | 1233 | 1234 | 1235 | 1236 | 1237 | 1238 | 1239 | 1240 | 1241 | 1242 | 1243 | 1244 | 1245 | 1246 | 1247 | 1248 | 1249 | 1250 | 1251 | 1252 | 1253 | 1254 | 1255 | 1256 | 1257 | 1258 | 1259 | 1260 | 1261 | 1262 | 1263 | 1264 | 1265 | 1266 | 1267 | 1268 | 1269 | 1270 | 1271 | 1272 | 1273 | 1274 | 1275 | 1276 | 1277 | 1278 | 1279 | 1280 | 1281 | 1282 | 1283 | 1284 | 1285 | 1286 | 1287 | 1288 | 1289 | 1290 | 1291 | 1292 | 1293 | 1294 | 1295 | 1296 | 1297 | 1298 | 1299 | 1300 | 1301 | 1302 | 1303 | 1304 | 1305 | 1306 | 1307 | 1308 | 1309 | 1310 | 1311 | 1312 | 1313 | 1314 | 1315 | 1316 | 1317 | 1318 | 1319 | 1320 | 1321 | 1322 | 1323 | 1324 | 1325 | 1326 | 1327 | 1328 | 1329 | 1330 | 1331 | 1332 | 1333 | 1334 | 1335 | 1336 | 1337 | 1338 | 1339 | 1340 | 1341 | 1342 | 1343 | 1344 | 1345 | 1346 | 1347 | 1348 | 1349 | 1350 | 1351 | 1352 | 1353 | 1354 | 1355 | 1356 | 1357 | 1358 | 1359 | 1360 | 1361 | 1362 | 1363 | 1364 | 1365 | 1366 | 1367 | 1368 | 1369 | 1370 | 1371 | 1372 | 1373 | 1374 | 1375 | 1376 | 1377 | 1378 | 1379 | 1380 | 1381 | 1382 | 1383 | 1384 | 1385 | 1386 | 1387 | 1388 | 1389 | 1390 | 1391 | 1392 | 1393 | 1394 | 1395 | 1396 | 1397 | 1398 | 1399 | 1400 | 1401 | 1402 | 1403 | 1404 | 1405 | 1406 | 1407 | 1408 | 1409 | 1410 | 1411 | 1412 | 1413 | 1414 | 1415 | 1416 | 1417 | 1418 | 1419 | 1420 | 1421 | 1422 | 1423 | 1424 | 1425 | 1426 | 1427 | 1428 | 1429 | 1430 | 1431 | 1432 | 1433 | 1434 | 1435 | 1436 | 1437 | 1438 | 1439 | 1440 | 1441 | 1442 | 1443 | 1444 | 1445 | 1446 | 1447 | 1448 | 1449 | 1450 | 1451 | 1452 | 1453 | 1454 | 1455 | 1456 | 1457 | 1458 | 1459 | 1460 | 1461 | 1462 | 1463 | 1464 | 1465 | 1466 | 1467 | 1468 | 1469 | 1470 | 1471 | 1472 | 1473 | 1474 | 1475 | 1476 | 1477 | 1478 | 1479 | 1480 | 1481 | 1482 | 1483 | 1484 | 1485 | 1486 | 1487 | 1488</ |
|---|---|---|---|---|---|---|---|---|----|----|----|----|----|----|----|----|----|----|----|----|----|----|----|----|----|----|----|----|----|----|----|----|----|----|----|----|----|----|----|----|----|----|----|----|----|----|----|----|----|----|----|----|----|----|----|----|----|----|----|----|----|----|----|----|----|----|----|----|----|----|----|----|----|----|----|----|----|----|----|----|----|----|----|----|----|----|----|----|----|----|----|----|----|----|----|----|----|----|-----|-----|-----|-----|-----|-----|-----|-----|-----|-----|-----|-----|-----|-----|-----|-----|-----|-----|-----|-----|-----|-----|-----|-----|-----|-----|-----|-----|-----|-----|-----|-----|-----|-----|-----|-----|-----|-----|-----|-----|-----|-----|-----|-----|-----|-----|-----|-----|-----|-----|-----|-----|-----|-----|-----|-----|-----|-----|-----|-----|-----|-----|-----|-----|-----|-----|-----|-----|-----|-----|-----|-----|-----|-----|-----|-----|-----|-----|-----|-----|-----|-----|-----|-----|-----|-----|-----|-----|-----|-----|-----|-----|-----|-----|-----|-----|-----|-----|-----|-----|-----|-----|-----|-----|-----|-----|-----|-----|-----|-----|-----|-----|-----|-----|-----|-----|-----|-----|-----|-----|-----|-----|-----|-----|-----|-----|-----|-----|-----|-----|-----|-----|-----|-----|-----|-----|-----|-----|-----|-----|-----|-----|-----|-----|-----|-----|-----|-----|-----|-----|-----|-----|-----|-----|-----|-----|-----|-----|-----|-----|-----|-----|-----|-----|-----|-----|-----|-----|-----|-----|-----|-----|-----|-----|-----|-----|-----|-----|-----|-----|-----|-----|-----|-----|-----|-----|-----|-----|-----|-----|-----|-----|-----|-----|-----|-----|-----|-----|-----|-----|-----|-----|-----|-----|-----|-----|-----|-----|-----|-----|-----|-----|-----|-----|-----|-----|-----|-----|-----|-----|-----|-----|-----|-----|-----|-----|-----|-----|-----|-----|-----|-----|-----|-----|-----|-----|-----|-----|-----|-----|-----|-----|-----|-----|-----|-----|-----|-----|-----|-----|-----|-----|-----|-----|-----|-----|-----|-----|-----|-----|-----|-----|-----|-----|-----|-----|-----|-----|-----|-----|-----|-----|-----|-----|-----|-----|-----|-----|-----|-----|-----|-----|-----|-----|-----|-----|-----|-----|-----|-----|-----|-----|-----|-----|-----|-----|-----|-----|-----|-----|-----|-----|-----|-----|-----|-----|-----|-----|-----|-----|-----|-----|-----|-----|-----|-----|-----|-----|-----|-----|-----|-----|-----|-----|-----|-----|-----|-----|-----|-----|-----|-----|-----|-----|-----|-----|-----|-----|-----|-----|-----|-----|-----|-----|-----|-----|-----|-----|-----|-----|-----|-----|-----|-----|-----|-----|-----|-----|-----|-----|-----|-----|-----|-----|-----|-----|-----|-----|-----|-----|-----|-----|-----|-----|-----|-----|-----|-----|-----|-----|-----|-----|-----|-----|-----|-----|-----|-----|-----|-----|-----|-----|-----|-----|-----|-----|-----|-----|-----|-----|-----|-----|-----|-----|-----|-----|-----|-----|-----|-----|-----|-----|-----|-----|-----|-----|-----|-----|-----|-----|-----|-----|-----|-----|-----|-----|-----|-----|-----|-----|-----|-----|-----|-----|-----|-----|-----|-----|-----|-----|-----|-----|-----|-----|-----|-----|-----|-----|-----|-----|-----|-----|-----|-----|-----|-----|-----|-----|-----|-----|-----|-----|-----|-----|-----|-----|-----|-----|-----|-----|-----|-----|-----|-----|-----|-----|-----|-----|-----|-----|-----|-----|-----|-----|-----|-----|-----|-----|-----|-----|-----|-----|-----|-----|-----|-----|-----|-----|-----|-----|-----|-----|-----|-----|-----|-----|-----|-----|-----|-----|-----|-----|-----|-----|-----|-----|-----|-----|-----|-----|-----|-----|-----|-----|-----|-----|-----|-----|-----|-----|-----|-----|-----|-----|-----|-----|-----|-----|-----|-----|-----|-----|-----|-----|-----|-----|-----|-----|-----|-----|-----|-----|-----|-----|-----|-----|-----|-----|-----|-----|-----|-----|-----|-----|-----|-----|-----|-----|-----|-----|-----|-----|-----|-----|-----|-----|-----|-----|-----|-----|-----|-----|-----|-----|-----|-----|-----|-----|-----|-----|-----|-----|-----|-----|-----|-----|-----|-----|-----|-----|-----|-----|-----|-----|-----|-----|-----|-----|-----|-----|-----|-----|-----|-----|-----|-----|-----|-----|-----|-----|-----|-----|-----|-----|-----|-----|-----|-----|-----|-----|-----|-----|-----|-----|-----|-----|-----|-----|-----|-----|-----|-----|-----|-----|-----|-----|-----|-----|-----|-----|-----|-----|-----|-----|-----|-----|-----|-----|-----|-----|-----|-----|-----|-----|-----|-----|-----|-----|-----|-----|-----|-----|-----|-----|-----|-----|-----|-----|-----|-----|-----|-----|-----|-----|-----|-----|-----|-----|-----|-----|-----|-----|-----|-----|-----|-----|-----|-----|-----|-----|-----|-----|-----|-----|-----|-----|-----|-----|-----|-----|-----|-----|-----|-----|-----|-----|-----|-----|-----|-----|-----|-----|-----|-----|-----|-----|-----|-----|-----|-----|-----|-----|-----|-----|-----|-----|-----|-----|-----|-----|-----|-----|-----|-----|-----|-----|-----|-----|-----|-----|-----|-----|-----|-----|-----|-----|-----|-----|-----|-----|-----|-----|-----|-----|-----|-----|-----|-----|-----|-----|-----|-----|-----|-----|-----|-----|-----|-----|-----|-----|-----|-----|-----|-----|-----|-----|-----|-----|-----|-----|-----|-----|-----|-----|-----|-----|-----|-----|-----|-----|-----|-----|-----|-----|-----|-----|-----|-----|-----|-----|-----|-----|-----|-----|-----|-----|-----|-----|-----|-----|-----|-----|-----|-----|-----|-----|-----|-----|-----|-----|-----|-----|-----|-----|-----|-----|-----|-----|-----|-----|-----|-----|-----|-----|-----|-----|-----|-----|-----|-----|-----|-----|-----|-----|-----|-----|-----|-----|-----|-----|-----|-----|-----|-----|-----|-----|-----|-----|-----|-----|-----|-----|-----|-----|-----|-----|-----|-----|-----|-----|-----|-----|-----|-----|-----|-----|-----|-----|-----|-----|-----|-----|-----|-----|-----|-----|-----|-----|-----|-----|------|------|------|------|------|------|------|------|------|------|------|------|------|------|------|------|------|------|------|------|------|------|------|------|------|------|------|------|------|------|------|------|------|------|------|------|------|------|------|------|------|------|------|------|------|------|------|------|------|------|------|------|------|------|------|------|------|------|------|------|------|------|------|------|------|------|------|------|------|------|------|------|------|------|------|------|------|------|------|------|------|------|------|------|------|------|------|------|------|------|------|------|------|------|------|------|------|------|------|------|------|------|------|------|------|------|------|------|------|------|------|------|------|------|------|------|------|------|------|------|------|------|------|------|------|------|------|------|------|------|------|------|------|------|------|------|------|------|------|------|------|------|------|------|------|------|------|------|------|------|------|------|------|------|------|------|------|------|------|------|------|------|------|------|------|------|------|------|------|------|------|------|------|------|------|------|------|------|------|------|------|------|------|------|------|------|------|------|------|------|------|------|------|------|------|------|------|------|------|------|------|------|------|------|------|------|------|------|------|------|------|------|------|------|------|------|------|------|------|------|------|------|------|------|------|------|------|------|------|------|------|------|------|------|------|------|------|------|------|------|------|------|------|------|------|------|------|------|------|------|------|------|------|------|------|------|------|------|------|------|------|------|------|------|------|------|------|------|------|------|------|------|------|------|------|------|------|------|------|------|------|------|------|------|------|------|------|------|------|------|------|------|------|------|------|------|------|------|------|------|------|------|------|------|------|------|------|------|------|------|------|------|------|------|------|------|------|------|------|------|------|------|------|------|------|------|------|------|------|------|------|------|------|------|------|------|------|------|------|------|------|------|------|------|------|------|------|------|------|------|------|------|------|------|------|------|------|------|------|------|------|------|------|------|------|------|------|------|------|------|------|------|------|------|------|------|------|------|------|------|------|------|------|------|------|------|------|------|------|------|------|------|------|------|------|------|------|------|------|------|------|------|------|------|------|------|------|------|------|------|------|------|------|------|------|------|------|------|------|------|------|------|------|------|------|------|------|------|------|------|------|------|------|------|------|------|------|------|------|------|------|------|------|------|------|------|------|------|------|------|------|------|------|------|------|------|------|------|------|------|------|------|------|------|------|------|------|------|------|------|------|------|------|------|------|------|------|------|------|------|------|------|------|------|------|------|------|------|--------|
|---|---|---|---|---|---|---|---|---|----|----|----|----|----|----|----|----|----|----|----|----|----|----|----|----|----|----|----|----|----|----|----|----|----|----|----|----|----|----|----|----|----|----|----|----|----|----|----|----|----|----|----|----|----|----|----|----|----|----|----|----|----|----|----|----|----|----|----|----|----|----|----|----|----|----|----|----|----|----|----|----|----|----|----|----|----|----|----|----|----|----|----|----|----|----|----|----|----|----|-----|-----|-----|-----|-----|-----|-----|-----|-----|-----|-----|-----|-----|-----|-----|-----|-----|-----|-----|-----|-----|-----|-----|-----|-----|-----|-----|-----|-----|-----|-----|-----|-----|-----|-----|-----|-----|-----|-----|-----|-----|-----|-----|-----|-----|-----|-----|-----|-----|-----|-----|-----|-----|-----|-----|-----|-----|-----|-----|-----|-----|-----|-----|-----|-----|-----|-----|-----|-----|-----|-----|-----|-----|-----|-----|-----|-----|-----|-----|-----|-----|-----|-----|-----|-----|-----|-----|-----|-----|-----|-----|-----|-----|-----|-----|-----|-----|-----|-----|-----|-----|-----|-----|-----|-----|-----|-----|-----|-----|-----|-----|-----|-----|-----|-----|-----|-----|-----|-----|-----|-----|-----|-----|-----|-----|-----|-----|-----|-----|-----|-----|-----|-----|-----|-----|-----|-----|-----|-----|-----|-----|-----|-----|-----|-----|-----|-----|-----|-----|-----|-----|-----|-----|-----|-----|-----|-----|-----|-----|-----|-----|-----|-----|-----|-----|-----|-----|-----|-----|-----|-----|-----|-----|-----|-----|-----|-----|-----|-----|-----|-----|-----|-----|-----|-----|-----|-----|-----|-----|-----|-----|-----|-----|-----|-----|-----|-----|-----|-----|-----|-----|-----|-----|-----|-----|-----|-----|-----|-----|-----|-----|-----|-----|-----|-----|-----|-----|-----|-----|-----|-----|-----|-----|-----|-----|-----|-----|-----|-----|-----|-----|-----|-----|-----|-----|-----|-----|-----|-----|-----|-----|-----|-----|-----|-----|-----|-----|-----|-----|-----|-----|-----|-----|-----|-----|-----|-----|-----|-----|-----|-----|-----|-----|-----|-----|-----|-----|-----|-----|-----|-----|-----|-----|-----|-----|-----|-----|-----|-----|-----|-----|-----|-----|-----|-----|-----|-----|-----|-----|-----|-----|-----|-----|-----|-----|-----|-----|-----|-----|-----|-----|-----|-----|-----|-----|-----|-----|-----|-----|-----|-----|-----|-----|-----|-----|-----|-----|-----|-----|-----|-----|-----|-----|-----|-----|-----|-----|-----|-----|-----|-----|-----|-----|-----|-----|-----|-----|-----|-----|-----|-----|-----|-----|-----|-----|-----|-----|-----|-----|-----|-----|-----|-----|-----|-----|-----|-----|-----|-----|-----|-----|-----|-----|-----|-----|-----|-----|-----|-----|-----|-----|-----|-----|-----|-----|-----|-----|-----|-----|-----|-----|-----|-----|-----|-----|-----|-----|-----|-----|-----|-----|-----|-----|-----|-----|-----|-----|-----|-----|-----|-----|-----|-----|-----|-----|-----|-----|-----|-----|-----|-----|-----|-----|-----|-----|-----|-----|-----|-----|-----|-----|-----|-----|-----|-----|-----|-----|-----|-----|-----|-----|-----|-----|-----|-----|-----|-----|-----|-----|-----|-----|-----|-----|-----|-----|-----|-----|-----|-----|-----|-----|-----|-----|-----|-----|-----|-----|-----|-----|-----|-----|-----|-----|-----|-----|-----|-----|-----|-----|-----|-----|-----|-----|-----|-----|-----|-----|-----|-----|-----|-----|-----|-----|-----|-----|-----|-----|-----|-----|-----|-----|-----|-----|-----|-----|-----|-----|-----|-----|-----|-----|-----|-----|-----|-----|-----|-----|-----|-----|-----|-----|-----|-----|-----|-----|-----|-----|-----|-----|-----|-----|-----|-----|-----|-----|-----|-----|-----|-----|-----|-----|-----|-----|-----|-----|-----|-----|-----|-----|-----|-----|-----|-----|-----|-----|-----|-----|-----|-----|-----|-----|-----|-----|-----|-----|-----|-----|-----|-----|-----|-----|-----|-----|-----|-----|-----|-----|-----|-----|-----|-----|-----|-----|-----|-----|-----|-----|-----|-----|-----|-----|-----|-----|-----|-----|-----|-----|-----|-----|-----|-----|-----|-----|-----|-----|-----|-----|-----|-----|-----|-----|-----|-----|-----|-----|-----|-----|-----|-----|-----|-----|-----|-----|-----|-----|-----|-----|-----|-----|-----|-----|-----|-----|-----|-----|-----|-----|-----|-----|-----|-----|-----|-----|-----|-----|-----|-----|-----|-----|-----|-----|-----|-----|-----|-----|-----|-----|-----|-----|-----|-----|-----|-----|-----|-----|-----|-----|-----|-----|-----|-----|-----|-----|-----|-----|-----|-----|-----|-----|-----|-----|-----|-----|-----|-----|-----|-----|-----|-----|-----|-----|-----|-----|-----|-----|-----|-----|-----|-----|-----|-----|-----|-----|-----|-----|-----|-----|-----|-----|-----|-----|-----|-----|-----|-----|-----|-----|-----|-----|-----|-----|-----|-----|-----|-----|-----|-----|-----|-----|-----|-----|-----|-----|-----|-----|-----|-----|-----|-----|-----|-----|-----|-----|-----|-----|-----|-----|-----|-----|-----|-----|-----|-----|-----|-----|-----|-----|-----|-----|-----|-----|-----|-----|-----|-----|-----|-----|-----|-----|-----|-----|-----|-----|-----|-----|-----|-----|-----|-----|-----|-----|-----|-----|-----|-----|-----|-----|-----|-----|-----|-----|-----|-----|-----|-----|-----|-----|-----|-----|-----|-----|-----|-----|-----|-----|-----|-----|-----|-----|-----|-----|-----|-----|-----|-----|-----|-----|-----|-----|-----|-----|-----|-----|-----|-----|-----|-----|-----|-----|-----|-----|-----|-----|-----|-----|-----|-----|-----|-----|-----|-----|-----|-----|-----|-----|-----|-----|-----|-----|-----|-----|-----|-----|-----|-----|-----|-----|-----|-----|-----|-----|-----|-----|-----|-----|-----|-----|-----|-----|-----|-----|-----|-----|-----|-----|-----|-----|-----|-----|-----|-----|-----|-----|-----|-----|-----|-----|-----|-----|-----|-----|-----|-----|-----|-----|-----|-----|-----|-----|-----|-----|-----|-----|-----|-----|-----|-----|-----|-----|-----|------|------|------|------|------|------|------|------|------|------|------|------|------|------|------|------|------|------|------|------|------|------|------|------|------|------|------|------|------|------|------|------|------|------|------|------|------|------|------|------|------|------|------|------|------|------|------|------|------|------|------|------|------|------|------|------|------|------|------|------|------|------|------|------|------|------|------|------|------|------|------|------|------|------|------|------|------|------|------|------|------|------|------|------|------|------|------|------|------|------|------|------|------|------|------|------|------|------|------|------|------|------|------|------|------|------|------|------|------|------|------|------|------|------|------|------|------|------|------|------|------|------|------|------|------|------|------|------|------|------|------|------|------|------|------|------|------|------|------|------|------|------|------|------|------|------|------|------|------|------|------|------|------|------|------|------|------|------|------|------|------|------|------|------|------|------|------|------|------|------|------|------|------|------|------|------|------|------|------|------|------|------|------|------|------|------|------|------|------|------|------|------|------|------|------|------|------|------|------|------|------|------|------|------|------|------|------|------|------|------|------|------|------|------|------|------|------|------|------|------|------|------|------|------|------|------|------|------|------|------|------|------|------|------|------|------|------|------|------|------|------|------|------|------|------|------|------|------|------|------|------|------|------|------|------|------|------|------|------|------|------|------|------|------|------|------|------|------|------|------|------|------|------|------|------|------|------|------|------|------|------|------|------|------|------|------|------|------|------|------|------|------|------|------|------|------|------|------|------|------|------|------|------|------|------|------|------|------|------|------|------|------|------|------|------|------|------|------|------|------|------|------|------|------|------|------|------|------|------|------|------|------|------|------|------|------|------|------|------|------|------|------|------|------|------|------|------|------|------|------|------|------|------|------|------|------|------|------|------|------|------|------|------|------|------|------|------|------|------|------|------|------|------|------|------|------|------|------|------|------|------|------|------|------|------|------|------|------|------|------|------|------|------|------|------|------|------|------|------|------|------|------|------|------|------|------|------|------|------|------|------|------|------|------|------|------|------|------|------|------|------|------|------|------|------|------|------|------|------|------|------|------|------|------|------|------|------|------|------|------|------|------|------|------|------|------|------|------|------|------|------|------|------|------|------|------|------|------|------|------|------|------|------|------|------|------|------|------|------|------|------|------|------|------|------|------|------|------|------|------|------|------|------|------|------|------|------|------|--------|

## MMs

| 1 | 2 | 3 | 4 | 5 | 6 | 7 | 8 | 9 | 10 | 11 | 12 | 13 | 14 | 15 | 16 | 17 | 18 | 19 | 20 | 21 | 22 | 23 | 24 | 25 | 26 | 27 | 28 | 29 | 30 | 31 | 32 | 33 | 34 | 35 | 36 | 37 | 38 | 39 | 40 | 41 | 42 | 43 | 44 | 45 | 46 | 47 | 48 | 49 | 50 | 51 | 52 | 53 | 54 | 55 | 56 | 57 | 58 | 59 | 60 | 61 | 62 | 63 | 64 | 65 | 66 | 67 | 68 | 69 | 70 | 71 | 72 | 73 | 74 | 75 | 76 | 77 | 78 | 79 | 80 | 81 | 82 | 83 | 84 | 85 | 86 | 87 | 88 | 89 | 90 | 91 | 92 | 93 | 94 | 95 | 96 | 97 | 98 | 99 | 100 | 101 | 102 | 103 | 104 | 105 | 106 | 107 | 108 | 109 | 110 | 111 | 112 | 113 | 114 | 115 | 116 | 117 | 118 | 119 | 120 | 121 | 122 | 123 | 124 | 125 | 126 | 127 | 128 | 129 | 130 | 131 | 132 | 133 | 134 | 135 | 136 | 137 | 138 | 139 | 140 | 141 | 142 | 143 | 144 | 145 | 146 | 147 | 148 | 149 | 150 | 151 | 152 | 153 | 154 | 155 | 156 | 157 | 158 | 159 | 160 | 161 | 162 | 163 | 164 | 165 | 166 | 167 | 168 | 169 | 170 | 171 | 172 | 173 | 174 | 175 | 176 | 177 | 178 | 179 | 180 | 181 | 182 | 183 | 184 | 185 | 186 | 187 | 188 | 189 | 190 | 191 | 192 | 193 | 194 | 195 | 196 | 197 | 198 | 199 | 200 | 201 | 202 | 203 | 204 | 205 | 206 | 207 | 208 | 209 | 210 | 211 | 212 | 213 | 214 | 215 | 216 | 217 | 218 | 219 | 220 | 221 | 222 | 223 | 224 | 225 | 226 | 227 | 228 | 229 | 230 | 231 | 232 | 233 | 234 | 235 | 236 | 237 | 238 | 239 | 240 | 241 | 242 | 243 | 244 | 245 | 246 | 247 | 248 | 249 | 250 | 251 | 252 | 253 | 254 | 255 | 256 | 257 | 258 | 259 | 260 | 261 | 262 | 263 | 264 | 265 | 266 | 267 | 268 | 269 | 270 | 271 | 272 | 273 | 274 | 275 | 276 | 277 | 278 | 279 | 280 | 281 | 282 | 283 | 284 | 285 | 286 | 287 | 288 | 289 | 290 | 291 | 292 | 293 | 294 | 295 | 296 | 297 | 298 | 299 | 300 | 301 | 302 | 303 | 304 | 305 | 306 | 307 | 308 | 309 | 310 | 311 | 312 | 313 | 314 | 315 | 316 | 317 | 318 | 319 | 320 | 321 | 322 | 323 | 324 | 325 | 326 | 327 | 328 | 329 | 330 | 331 | 332 | 333 | 334 | 335 | 336 | 337 | 338 | 339 | 340 | 341 | 342 | 343 | 344 | 345 | 346 | 347 | 348 | 349 | 350 | 351 | 352 | 353 | 354 | 355 | 356 | 357 | 358 | 359 | 360 | 361 | 362 | 363 | 364 | 365 | 366 | 367 | 368 | 369 | 370 | 371 | 372 | 373 | 374 | 375 | 376 | 377 | 378 | 379 | 380 | 381 | 382 | 383 | 384 | 385 | 386 | 387 | 388 | 389 | 390 | 391 | 392 | 393 | 394 | 395 | 396 | 397 | 398 | 399 | 400 | 401 | 402 | 403 | 404 | 405 | 406 | 407 | 408 | 409 | 410 | 411 | 412 | 413 | 414 | 415 | 416 | 417 | 418 | 419 | 420 | 421 | 422 | 423 | 424 | 425 | 426 | 427 | 428 | 429 | 430 | 431 | 432 | 433 | 434 | 435 | 436 | 437 | 438 | 439 | 440 | 441 | 442 | 443 | 444 | 445 | 446 | 447 | 448 | 449 | 450 | 451 | 452 | 453 | 454 | 455 | 456 | 457 | 458 | 459 | 460 | 461 | 462 | 463 | 464 | 465 | 466 | 467 | 468 | 469 | 470 | 471 | 472 | 473 | 474 | 475 | 476 | 477 | 478 | 479 | 480 | 481 | 482 | 483 | 484 | 485 | 486 | 487 | 488 | 489 | 490 | 491 | 492 | 493 | 494 | 495 | 496 | 497 | 498 | 499 | 500 | 501 | 502 | 503 | 504 | 505 | 506 | 507 | 508 | 509 | 510 | 511 | 512 | 513 | 514 | 515 | 516 | 517 | 518 | 519 | 520 | 521 | 522 | 523 | 524 | 525 | 526 | 527 | 528 | 529 | 530 | 531 | 532 | 533 | 534 | 535 | 536 | 537 | 538 | 539 | 540 | 541 | 542 | 543 | 544 | 545 | 546 | 547 | 548 | 549 | 550 | 551 | 552 | 553 | 554 | 555 | 556 | 557 | 558 | 559 | 560 | 561 | 562 | 563 | 564 | 565 | 566 | 567 | 568 | 569 | 570 | 571 | 572 | 573 | 574 | 575 | 576 | 577 | 578 | 579 | 580 | 581 | 582 | 583 | 584 | 585 | 586 | 587 | 588 | 589 | 590 | 591 | 592 | 593 | 594 | 595 | 596 | 597 | 598 | 599 | 600 | 601 | 602 | 603 | 604 | 605 | 606 | 607 | 608 | 609 | 610 | 611 | 612 | 613 | 614 | 615 | 616 | 617 | 618 | 619 | 620 | 621 | 622 | 623 | 624 | 625 | 626 | 627 | 628 | 629 | 630 | 631 | 632 | 633 | 634 | 635 | 636 | 637 | 638 | 639 | 640 | 641 | 642 | 643 | 644 | 645 | 646 | 647 | 648 | 649 | 650 | 651 | 652 | 653 | 654 | 655 | 656 | 657 | 658 | 659 | 660 | 661 | 662 | 663 | 664 | 665 | 666 | 667 | 668 | 669 | 670 | 671 | 672 | 673 | 674 | 675 | 676 | 677 | 678 | 679 | 680 | 681 | 682 | 683 | 684 | 685 | 686 | 687 | 688 | 689 | 690 | 691 | 692 | 693 | 694 | 695 | 696 | 697 | 698 | 699 | 700 | 701 | 702 | 703 | 704 | 705 | 706 | 707 | 708 | 709 | 710 | 711 | 712 | 713 | 714 | 715 | 716 | 717 | 718 | 719 | 720 | 721 | 722 | 723 | 724 | 725 | 726 | 727 | 728 | 729 | 730 | 731 | 732 | 733 | 734 | 735 | 736 | 737 | 738 | 739 | 740 | 741 | 742 | 743 | 744 | 745 | 746 | 747 | 748 | 749 | 750 | 751 | 752 | 753 | 754 | 755 | 756 | 757 | 758 | 759 | 760 | 761 | 762 | 763 | 764 | 765 | 766 | 767 | 768 | 769 | 770 | 771 | 772 | 773 | 774 | 775 | 776 | 777 | 778 | 779 | 780 | 781 | 782 | 783 | 784 | 785 | 786 | 787 | 788 | 789 | 790 | 791 | 792 | 793 | 794 | 795 | 796 | 797 | 798 | 799 | 800 | 801 | 802 | 803 | 804 | 805 | 806 | 807 | 808 | 809 | 810 | 811 | 812 | 813 | 814 | 815 | 816 | 817 | 818 | 819 | 820 | 821 | 822 | 823 | 824 | 825 | 826 | 827 | 828 | 829 | 830 | 831 | 832 | 833 | 834 | 835 | 836 | 837 | 838 | 839 | 840 | 841 | 842 | 843 | 844 | 845 | 846 | 847 | 848 | 849 | 850 | 851 | 852 | 853 | 854 | 855 | 856 | 857 | 858 | 859 | 860 | 861 | 862 | 863 | 864 | 865 | 866 | 867 | 868 | 869 | 870 | 871 | 872 | 873 | 874 | 875 | 876 | 877 | 878 | 879 | 880 | 881 | 882 | 883 | 884 | 885 | 886 | 887 | 888 | 889 | 890 | 891 | 892 | 893 | 894 | 895 | 896 | 897 | 898 | 899 | 900 | 901 | 902 | 903 | 904 | 905 | 906 | 907 | 908 | 909 | 910 | 911 | 912 | 913 | 914 | 915 | 916 | 917 | 918 | 919 | 920 | 921 | 922 | 923 | 924 | 925 | 926 | 927 | 928 | 929 | 930 | 931 | 932 | 933 | 934 | 935 | 936 | 937 | 938 | 939 | 940 | 941 | 942 | 943 | 944 | 945 | 946 | 947 | 948 | 949 | 950 | 951 | 952 | 953 | 954 | 955 | 956 | 957 | 958 | 959 | 960 | 961 | 962 | 963 | 964 | 965 | 966 | 967 | 968 | 969 | 970 | 971 | 972 | 973 | 974 | 975 | 976 | 977 | 978 | 979 | 980 | 981 | 982 | 983 | 984 | 985 | 986 | 987 | 988 | 989 | 990 | 991 | 992 | 993 | 994 | 995 | 996 | 997 | 998 | 999 | 1000 | 1001 | 1002 | 1003 | 1004 | 1005 | 1006 | 1007 | 1008 | 1009 | 1010 | 1011 | 1012 | 1013 | 1014 | 1015 | 1016 | 1017 | 1018 | 1019 | 1020 | 1021 | 1022 | 1023 | 1024 | 1025 | 1026 | 1027 | 1028 | 1029 | 1030 | 1031 | 1032 | 1033 | 1034 | 1035 | 1036 | 1037 | 1038 | 1039 | 1040 | 1041 | 1042 | 1043 | 1044 | 1045 | 1046 | 1047 | 1048 | 1049 | 1050 | 1051 | 1052 | 1053 | 1054 | 1055 | 1056 | 1057 | 1058 | 1059 | 1060 | 1061 | 1062 | 1063 | 1064 | 1065 | 1066 | 1067 | 1068 | 1069 | 1070 | 1071 | 1072 | 1073 | 1074 | 1075 | 1076 | 1077 | 1078 | 1079 | 1080 | 1081 | 1082 | 1083 | 1084 | 1085 | 1086 | 1087 | 1088 | 1089 | 1090 | 1091 | 1092 | 1093 | 1094 | 1095 | 1096 | 1097 | 1098 | 1099 | 1100 | 1101 | 1102 | 1103 | 1104 | 1105 | 1106 | 1107 | 1108 | 1109 | 1110 | 1111 | 1112 | 1113 | 1114 | 1115 | 1116 | 1117 | 1118 | 1119 | 1120 | 1121 | 1122 | 1123 | 1124 | 1125 | 1126 | 1127 | 1128 | 1129 | 1130 | 1131 | 1132 | 1133 | 1134 | 1135 | 1136 | 1137 | 1138 | 1139 | 1140 | 1141 | 1142 | 1143 | 1144 | 1145 | 1146 | 1147 | 1148 | 1149 | 1150 | 1151 | 1152 | 1153 | 1154 | 1155 | 1156 | 1157 | 1158 | 1159 | 1160 | 1161 | 1162 | 1163 | 1164 | 1165 | 1166 | 1167 | 1168 | 1169 | 1170 | 1171 | 1172 | 1173 | 1174 | 1175 | 1176 | 1177 | 1178 | 1179 | 1180 | 1181 | 1182 | 1183 | 1184 | 1185 | 1186 | 1187 | 1188 | 1189 | 1190 | 1191 | 1192 | 1193 | 1194 | 1195 | 1196 | 1197 | 1198 | 1199 | 1200 | 1201 | 1202 | 1203 | 1204 | 1205 | 1206 | 1207 | 1208 | 1209 | 1210 | 1211 | 1212 | 1213 | 1214 | 1215 | 1216 | 1217 | 1218 | 1219 | 1220 | 1221 | 1222 | 1223 | 1224 | 1225 | 1226 | 1227 | 1228 | 1229 | 1230 | 1231 | 1232 | 1233 | 1234 | 1235 | 1236 | 1237 | 1238 | 1239 | 1240 | 1241 | 1242 | 1243 | 1244 | 1245 | 1246 | 1247 | 1248 | 1249 | 1250 | 1251 | 1252 | 1253 | 1254 | 1255 | 1256 | 1257 | 1258 | 1259 | 1260 | 1261 | 1262 | 1263 | 1264 | 1265 | 1266 | 1267 | 1268 | 1269 | 1270 | 1271 | 1272 | 1273 | 1274 | 1275 | 1276 | 1277 | 1278 | 1279 | 1280 | 1281 | 1282 | 1283 | 1284 | 1285 | 1286 | 1287 | 1288 | 1289 | 1290 | 1291 | 1292 | 1293 | 1294 | 1295 | 1296 | 1297 | 1298 | 1299 | 1300 | 1301 | 1302 | 1303 | 1304 | 1305 | 1306 | 1307 | 1308 | 1309 | 1310 | 1311 | 1312 | 1313 | 1314 | 1315 | 1316 | 1317 | 1318 | 1319 | 1320 | 1321 | 1322 | 1323 | 1324 | 1325 | 1326 | 1327 | 1328 | 1329 | 1330 | 1331 | 1332 | 1333 | 1334 | 1335 | 1336 | 1337 | 1338 | 1339 | 1340 | 1341 | 1342 | 1343 | 1344 | 1345 | 1346 | 1347 | 1348 | 1349 | 1350 | 1351 | 1352 | 1353 | 1354 | 1355 | 1356 | 1357 | 1358 | 1359 | 1360 | 1361 | 1362 | 1363 | 1364 | 1365 | 1366 | 1367 | 1368 | 1369 | 1370 | 1371 | 1372 | 1373 | 1374 | 1375 | 1376 | 1377 | 1378 | 1379 | 1380 | 1381 | 1382 | 1383 | 1384 | 1385 | 1386 | 1387 | 1388 | 1389 | 1390 | 1391 | 1392 | 1393 | 1394 | 1395 | 1396 | 1397 | 1398 | 1399 | 1400 | 1401 | 1402 | 1403 | 1404 | 1405 | 1406 | 1407 | 1408 | 1409 | 1410 | 1411 | 1412 | 1413 | 1414 | 1415 | 1416 | 1417 | 1418 | 1419 | 1420 | 1421 | 1422 | 1423 | 1424 | 1425 | 1426 | 1427 | 1428 | 1429 | 1430 | 1431 | 1432 | 1433 | 1434 | 1435 | 1436 | 1437 | 1438 | 1439 | 1440 | 1441 | 1442 | 1443 | 1444 | 1445 | 1446 | 1447 | 1448 | 1449 | 1450 | 1451 | 1452 | 1453 | 1454 | 1455 | 1456 | 1457 | 1458 | 1459 | 1460 | 1461 | 1462 | 1463 | 1464 | 1465 | 1466 | 1467 | 1468 | 1469 | 1470 | 1471 | 1472 | 1473 | 1474 | 1475 | 1476 | 1477 | 1478 | 1479 | 1480 | 1481 | 1482 | 1483 | 1484 | 1485 | 1486 | 1487 | 1488 | 1 |
|---|---|---|---|---|---|---|---|---|----|----|----|----|----|----|----|----|----|----|----|----|----|----|----|----|----|----|----|----|----|----|----|----|----|----|----|----|----|----|----|----|----|----|----|----|----|----|----|----|----|----|----|----|----|----|----|----|----|----|----|----|----|----|----|----|----|----|----|----|----|----|----|----|----|----|----|----|----|----|----|----|----|----|----|----|----|----|----|----|----|----|----|----|----|----|----|----|----|----|-----|-----|-----|-----|-----|-----|-----|-----|-----|-----|-----|-----|-----|-----|-----|-----|-----|-----|-----|-----|-----|-----|-----|-----|-----|-----|-----|-----|-----|-----|-----|-----|-----|-----|-----|-----|-----|-----|-----|-----|-----|-----|-----|-----|-----|-----|-----|-----|-----|-----|-----|-----|-----|-----|-----|-----|-----|-----|-----|-----|-----|-----|-----|-----|-----|-----|-----|-----|-----|-----|-----|-----|-----|-----|-----|-----|-----|-----|-----|-----|-----|-----|-----|-----|-----|-----|-----|-----|-----|-----|-----|-----|-----|-----|-----|-----|-----|-----|-----|-----|-----|-----|-----|-----|-----|-----|-----|-----|-----|-----|-----|-----|-----|-----|-----|-----|-----|-----|-----|-----|-----|-----|-----|-----|-----|-----|-----|-----|-----|-----|-----|-----|-----|-----|-----|-----|-----|-----|-----|-----|-----|-----|-----|-----|-----|-----|-----|-----|-----|-----|-----|-----|-----|-----|-----|-----|-----|-----|-----|-----|-----|-----|-----|-----|-----|-----|-----|-----|-----|-----|-----|-----|-----|-----|-----|-----|-----|-----|-----|-----|-----|-----|-----|-----|-----|-----|-----|-----|-----|-----|-----|-----|-----|-----|-----|-----|-----|-----|-----|-----|-----|-----|-----|-----|-----|-----|-----|-----|-----|-----|-----|-----|-----|-----|-----|-----|-----|-----|-----|-----|-----|-----|-----|-----|-----|-----|-----|-----|-----|-----|-----|-----|-----|-----|-----|-----|-----|-----|-----|-----|-----|-----|-----|-----|-----|-----|-----|-----|-----|-----|-----|-----|-----|-----|-----|-----|-----|-----|-----|-----|-----|-----|-----|-----|-----|-----|-----|-----|-----|-----|-----|-----|-----|-----|-----|-----|-----|-----|-----|-----|-----|-----|-----|-----|-----|-----|-----|-----|-----|-----|-----|-----|-----|-----|-----|-----|-----|-----|-----|-----|-----|-----|-----|-----|-----|-----|-----|-----|-----|-----|-----|-----|-----|-----|-----|-----|-----|-----|-----|-----|-----|-----|-----|-----|-----|-----|-----|-----|-----|-----|-----|-----|-----|-----|-----|-----|-----|-----|-----|-----|-----|-----|-----|-----|-----|-----|-----|-----|-----|-----|-----|-----|-----|-----|-----|-----|-----|-----|-----|-----|-----|-----|-----|-----|-----|-----|-----|-----|-----|-----|-----|-----|-----|-----|-----|-----|-----|-----|-----|-----|-----|-----|-----|-----|-----|-----|-----|-----|-----|-----|-----|-----|-----|-----|-----|-----|-----|-----|-----|-----|-----|-----|-----|-----|-----|-----|-----|-----|-----|-----|-----|-----|-----|-----|-----|-----|-----|-----|-----|-----|-----|-----|-----|-----|-----|-----|-----|-----|-----|-----|-----|-----|-----|-----|-----|-----|-----|-----|-----|-----|-----|-----|-----|-----|-----|-----|-----|-----|-----|-----|-----|-----|-----|-----|-----|-----|-----|-----|-----|-----|-----|-----|-----|-----|-----|-----|-----|-----|-----|-----|-----|-----|-----|-----|-----|-----|-----|-----|-----|-----|-----|-----|-----|-----|-----|-----|-----|-----|-----|-----|-----|-----|-----|-----|-----|-----|-----|-----|-----|-----|-----|-----|-----|-----|-----|-----|-----|-----|-----|-----|-----|-----|-----|-----|-----|-----|-----|-----|-----|-----|-----|-----|-----|-----|-----|-----|-----|-----|-----|-----|-----|-----|-----|-----|-----|-----|-----|-----|-----|-----|-----|-----|-----|-----|-----|-----|-----|-----|-----|-----|-----|-----|-----|-----|-----|-----|-----|-----|-----|-----|-----|-----|-----|-----|-----|-----|-----|-----|-----|-----|-----|-----|-----|-----|-----|-----|-----|-----|-----|-----|-----|-----|-----|-----|-----|-----|-----|-----|-----|-----|-----|-----|-----|-----|-----|-----|-----|-----|-----|-----|-----|-----|-----|-----|-----|-----|-----|-----|-----|-----|-----|-----|-----|-----|-----|-----|-----|-----|-----|-----|-----|-----|-----|-----|-----|-----|-----|-----|-----|-----|-----|-----|-----|-----|-----|-----|-----|-----|-----|-----|-----|-----|-----|-----|-----|-----|-----|-----|-----|-----|-----|-----|-----|-----|-----|-----|-----|-----|-----|-----|-----|-----|-----|-----|-----|-----|-----|-----|-----|-----|-----|-----|-----|-----|-----|-----|-----|-----|-----|-----|-----|-----|-----|-----|-----|-----|-----|-----|-----|-----|-----|-----|-----|-----|-----|-----|-----|-----|-----|-----|-----|-----|-----|-----|-----|-----|-----|-----|-----|-----|-----|-----|-----|-----|-----|-----|-----|-----|-----|-----|-----|-----|-----|-----|-----|-----|-----|-----|-----|-----|-----|-----|-----|-----|-----|-----|-----|-----|-----|-----|-----|-----|-----|-----|-----|-----|-----|-----|-----|-----|-----|-----|-----|-----|-----|-----|-----|-----|-----|-----|-----|-----|-----|-----|-----|-----|-----|-----|-----|-----|-----|-----|-----|-----|-----|-----|-----|-----|-----|-----|-----|-----|-----|-----|-----|-----|-----|-----|-----|-----|-----|-----|-----|-----|-----|-----|-----|-----|-----|-----|-----|-----|-----|-----|-----|-----|-----|-----|-----|-----|-----|-----|-----|-----|-----|-----|-----|-----|-----|-----|-----|-----|-----|-----|-----|-----|-----|-----|-----|-----|-----|-----|-----|-----|-----|-----|-----|-----|-----|-----|-----|-----|-----|-----|-----|-----|-----|-----|-----|-----|-----|-----|-----|-----|-----|-----|-----|-----|-----|-----|-----|-----|-----|-----|-----|-----|-----|-----|-----|-----|-----|-----|-----|-----|-----|-----|-----|-----|-----|-----|-----|-----|-----|-----|-----|-----|-----|-----|-----|-----|-----|-----|-----|-----|-----|-----|-----|-----|-----|-----|------|------|------|------|------|------|------|------|------|------|------|------|------|------|------|------|------|------|------|------|------|------|------|------|------|------|------|------|------|------|------|------|------|------|------|------|------|------|------|------|------|------|------|------|------|------|------|------|------|------|------|------|------|------|------|------|------|------|------|------|------|------|------|------|------|------|------|------|------|------|------|------|------|------|------|------|------|------|------|------|------|------|------|------|------|------|------|------|------|------|------|------|------|------|------|------|------|------|------|------|------|------|------|------|------|------|------|------|------|------|------|------|------|------|------|------|------|------|------|------|------|------|------|------|------|------|------|------|------|------|------|------|------|------|------|------|------|------|------|------|------|------|------|------|------|------|------|------|------|------|------|------|------|------|------|------|------|------|------|------|------|------|------|------|------|------|------|------|------|------|------|------|------|------|------|------|------|------|------|------|------|------|------|------|------|------|------|------|------|------|------|------|------|------|------|------|------|------|------|------|------|------|------|------|------|------|------|------|------|------|------|------|------|------|------|------|------|------|------|------|------|------|------|------|------|------|------|------|------|------|------|------|------|------|------|------|------|------|------|------|------|------|------|------|------|------|------|------|------|------|------|------|------|------|------|------|------|------|------|------|------|------|------|------|------|------|------|------|------|------|------|------|------|------|------|------|------|------|------|------|------|------|------|------|------|------|------|------|------|------|------|------|------|------|------|------|------|------|------|------|------|------|------|------|------|------|------|------|------|------|------|------|------|------|------|------|------|------|------|------|------|------|------|------|------|------|------|------|------|------|------|------|------|------|------|------|------|------|------|------|------|------|------|------|------|------|------|------|------|------|------|------|------|------|------|------|------|------|------|------|------|------|------|------|------|------|------|------|------|------|------|------|------|------|------|------|------|------|------|------|------|------|------|------|------|------|------|------|------|------|------|------|------|------|------|------|------|------|------|------|------|------|------|------|------|------|------|------|------|------|------|------|------|------|------|------|------|------|------|------|------|------|------|------|------|------|------|------|------|------|------|------|------|------|------|------|------|------|------|------|------|------|------|------|------|------|------|------|------|------|------|------|------|------|------|------|------|------|------|------|------|------|------|------|------|------|------|------|------|------|------|------|------|------|------|------|------|------|------|------|------|------|------|------|------|------|------|------|------|---|
|---|---|---|---|---|---|---|---|---|----|----|----|----|----|----|----|----|----|----|----|----|----|----|----|----|----|----|----|----|----|----|----|----|----|----|----|----|----|----|----|----|----|----|----|----|----|----|----|----|----|----|----|----|----|----|----|----|----|----|----|----|----|----|----|----|----|----|----|----|----|----|----|----|----|----|----|----|----|----|----|----|----|----|----|----|----|----|----|----|----|----|----|----|----|----|----|----|----|----|-----|-----|-----|-----|-----|-----|-----|-----|-----|-----|-----|-----|-----|-----|-----|-----|-----|-----|-----|-----|-----|-----|-----|-----|-----|-----|-----|-----|-----|-----|-----|-----|-----|-----|-----|-----|-----|-----|-----|-----|-----|-----|-----|-----|-----|-----|-----|-----|-----|-----|-----|-----|-----|-----|-----|-----|-----|-----|-----|-----|-----|-----|-----|-----|-----|-----|-----|-----|-----|-----|-----|-----|-----|-----|-----|-----|-----|-----|-----|-----|-----|-----|-----|-----|-----|-----|-----|-----|-----|-----|-----|-----|-----|-----|-----|-----|-----|-----|-----|-----|-----|-----|-----|-----|-----|-----|-----|-----|-----|-----|-----|-----|-----|-----|-----|-----|-----|-----|-----|-----|-----|-----|-----|-----|-----|-----|-----|-----|-----|-----|-----|-----|-----|-----|-----|-----|-----|-----|-----|-----|-----|-----|-----|-----|-----|-----|-----|-----|-----|-----|-----|-----|-----|-----|-----|-----|-----|-----|-----|-----|-----|-----|-----|-----|-----|-----|-----|-----|-----|-----|-----|-----|-----|-----|-----|-----|-----|-----|-----|-----|-----|-----|-----|-----|-----|-----|-----|-----|-----|-----|-----|-----|-----|-----|-----|-----|-----|-----|-----|-----|-----|-----|-----|-----|-----|-----|-----|-----|-----|-----|-----|-----|-----|-----|-----|-----|-----|-----|-----|-----|-----|-----|-----|-----|-----|-----|-----|-----|-----|-----|-----|-----|-----|-----|-----|-----|-----|-----|-----|-----|-----|-----|-----|-----|-----|-----|-----|-----|-----|-----|-----|-----|-----|-----|-----|-----|-----|-----|-----|-----|-----|-----|-----|-----|-----|-----|-----|-----|-----|-----|-----|-----|-----|-----|-----|-----|-----|-----|-----|-----|-----|-----|-----|-----|-----|-----|-----|-----|-----|-----|-----|-----|-----|-----|-----|-----|-----|-----|-----|-----|-----|-----|-----|-----|-----|-----|-----|-----|-----|-----|-----|-----|-----|-----|-----|-----|-----|-----|-----|-----|-----|-----|-----|-----|-----|-----|-----|-----|-----|-----|-----|-----|-----|-----|-----|-----|-----|-----|-----|-----|-----|-----|-----|-----|-----|-----|-----|-----|-----|-----|-----|-----|-----|-----|-----|-----|-----|-----|-----|-----|-----|-----|-----|-----|-----|-----|-----|-----|-----|-----|-----|-----|-----|-----|-----|-----|-----|-----|-----|-----|-----|-----|-----|-----|-----|-----|-----|-----|-----|-----|-----|-----|-----|-----|-----|-----|-----|-----|-----|-----|-----|-----|-----|-----|-----|-----|-----|-----|-----|-----|-----|-----|-----|-----|-----|-----|-----|-----|-----|-----|-----|-----|-----|-----|-----|-----|-----|-----|-----|-----|-----|-----|-----|-----|-----|-----|-----|-----|-----|-----|-----|-----|-----|-----|-----|-----|-----|-----|-----|-----|-----|-----|-----|-----|-----|-----|-----|-----|-----|-----|-----|-----|-----|-----|-----|-----|-----|-----|-----|-----|-----|-----|-----|-----|-----|-----|-----|-----|-----|-----|-----|-----|-----|-----|-----|-----|-----|-----|-----|-----|-----|-----|-----|-----|-----|-----|-----|-----|-----|-----|-----|-----|-----|-----|-----|-----|-----|-----|-----|-----|-----|-----|-----|-----|-----|-----|-----|-----|-----|-----|-----|-----|-----|-----|-----|-----|-----|-----|-----|-----|-----|-----|-----|-----|-----|-----|-----|-----|-----|-----|-----|-----|-----|-----|-----|-----|-----|-----|-----|-----|-----|-----|-----|-----|-----|-----|-----|-----|-----|-----|-----|-----|-----|-----|-----|-----|-----|-----|-----|-----|-----|-----|-----|-----|-----|-----|-----|-----|-----|-----|-----|-----|-----|-----|-----|-----|-----|-----|-----|-----|-----|-----|-----|-----|-----|-----|-----|-----|-----|-----|-----|-----|-----|-----|-----|-----|-----|-----|-----|-----|-----|-----|-----|-----|-----|-----|-----|-----|-----|-----|-----|-----|-----|-----|-----|-----|-----|-----|-----|-----|-----|-----|-----|-----|-----|-----|-----|-----|-----|-----|-----|-----|-----|-----|-----|-----|-----|-----|-----|-----|-----|-----|-----|-----|-----|-----|-----|-----|-----|-----|-----|-----|-----|-----|-----|-----|-----|-----|-----|-----|-----|-----|-----|-----|-----|-----|-----|-----|-----|-----|-----|-----|-----|-----|-----|-----|-----|-----|-----|-----|-----|-----|-----|-----|-----|-----|-----|-----|-----|-----|-----|-----|-----|-----|-----|-----|-----|-----|-----|-----|-----|-----|-----|-----|-----|-----|-----|-----|-----|-----|-----|-----|-----|-----|-----|-----|-----|-----|-----|-----|-----|-----|-----|-----|-----|-----|-----|-----|-----|-----|-----|-----|-----|-----|-----|-----|-----|-----|-----|-----|-----|-----|-----|-----|-----|-----|-----|-----|-----|-----|-----|-----|-----|-----|-----|-----|-----|-----|-----|-----|-----|-----|-----|-----|-----|-----|-----|-----|-----|-----|-----|-----|-----|-----|-----|-----|-----|-----|-----|-----|-----|-----|-----|-----|-----|-----|-----|-----|-----|-----|-----|-----|-----|-----|-----|-----|-----|-----|-----|-----|-----|-----|-----|-----|-----|-----|-----|-----|-----|-----|-----|-----|-----|-----|-----|-----|-----|-----|-----|-----|-----|-----|-----|-----|-----|-----|-----|-----|-----|-----|-----|-----|-----|-----|-----|-----|-----|-----|-----|-----|-----|-----|-----|-----|-----|-----|-----|-----|-----|-----|-----|-----|-----|-----|-----|-----|-----|-----|-----|-----|-----|-----|-----|-----|-----|-----|-----|-----|-----|-----|-----|-----|-----|-----|-----|-----|-----|-----|-----|-----|-----|-----|-----|-----|-----|-----|-----|-----|-----|-----|------|------|------|------|------|------|------|------|------|------|------|------|------|------|------|------|------|------|------|------|------|------|------|------|------|------|------|------|------|------|------|------|------|------|------|------|------|------|------|------|------|------|------|------|------|------|------|------|------|------|------|------|------|------|------|------|------|------|------|------|------|------|------|------|------|------|------|------|------|------|------|------|------|------|------|------|------|------|------|------|------|------|------|------|------|------|------|------|------|------|------|------|------|------|------|------|------|------|------|------|------|------|------|------|------|------|------|------|------|------|------|------|------|------|------|------|------|------|------|------|------|------|------|------|------|------|------|------|------|------|------|------|------|------|------|------|------|------|------|------|------|------|------|------|------|------|------|------|------|------|------|------|------|------|------|------|------|------|------|------|------|------|------|------|------|------|------|------|------|------|------|------|------|------|------|------|------|------|------|------|------|------|------|------|------|------|------|------|------|------|------|------|------|------|------|------|------|------|------|------|------|------|------|------|------|------|------|------|------|------|------|------|------|------|------|------|------|------|------|------|------|------|------|------|------|------|------|------|------|------|------|------|------|------|------|------|------|------|------|------|------|------|------|------|------|------|------|------|------|------|------|------|------|------|------|------|------|------|------|------|------|------|------|------|------|------|------|------|------|------|------|------|------|------|------|------|------|------|------|------|------|------|------|------|------|------|------|------|------|------|------|------|------|------|------|------|------|------|------|------|------|------|------|------|------|------|------|------|------|------|------|------|------|------|------|------|------|------|------|------|------|------|------|------|------|------|------|------|------|------|------|------|------|------|------|------|------|------|------|------|------|------|------|------|------|------|------|------|------|------|------|------|------|------|------|------|------|------|------|------|------|------|------|------|------|------|------|------|------|------|------|------|------|------|------|------|------|------|------|------|------|------|------|------|------|------|------|------|------|------|------|------|------|------|------|------|------|------|------|------|------|------|------|------|------|------|------|------|------|------|------|------|------|------|------|------|------|------|------|------|------|------|------|------|------|------|------|------|------|------|------|------|------|------|------|------|------|------|------|------|------|------|------|------|------|------|------|------|------|------|------|------|------|------|------|------|------|------|------|------|------|------|------|------|------|------|------|------|------|------|------|------|------|------|------|------|------|------|------|------|------|------|------|------|------|------|------|------|------|---|

## MMs

| 11 | 12 | 13 | 14 | 15 | 16 | 17 | 18 | 19 | 20 | 21 | 22 | 23 | 24 | 25 | 26 | 27 | 28 | 29 | 30 | 31 | 32 | 33 | 34 | 35 | 36 | 37 | 38 | 39 | 40 | 41 | 42 | 43 | 44 | 45 | 46 | 47 | 48 | 49 | 50 | 51 | 52 | 53 | 54 | 55 | 56 | 57 | 58 | 59 | 60 | 61 | 62 | 63 | 64 | 65 | 66 | 67 | 68 | 69 | 70 | 71 | 72 | 73 | 74 | 75 | 76 | 77 | 78 | 79 | 80 | 81 | 82 | 83 | 84 | 85 | 86 | 87 | 88 | 89 | 90 | 91 | 92 | 93 | 94 | 95 | 96 | 97 | 98 | 99 | 100 | 101 | 102 | 103 | 104 | 105 | 106 | 107 | 108 | 109 | 110 | 111 | 112 | 113 | 114 | 115 | 116 | 117 | 118 | 119 | 120 | 121 | 122 | 123 | 124 | 125 | 126 | 127 | 128 | 129 | 130 | 131 | 132 | 133 | 134 | 135 | 136 | 137 | 138 | 139 | 140 | 141 | 142 | 143 | 144 | 145 | 146 | 147 | 148 | 149 | 150 | 151 | 152 | 153 | 154 | 155 | 156 | 157 | 158 | 159 | 160 | 161 | 162 | 163 | 164 | 165 | 166 | 167 | 168 | 169 | 170 | 171 | 172 | 173 | 174 | 175 | 176 | 177 | 178 | 179 | 180 | 181 | 182 | 183 | 184 | 185 | 186 | 187 | 188 | 189 | 190 | 191 | 192 | 193 | 194 | 195 | 196 | 197 | 198 | 199 | 200 | 201 | 202 | 203 | 204 | 205 | 206 | 207 | 208 | 209 | 210 | 211 | 212 | 213 | 214 | 215 | 216 | 217 | 218 | 219 | 220 | 221 | 222 | 223 | 224 | 225 | 226 | 227 | 228 | 229 | 230 | 231 | 232 | 233 | 234 | 235 | 236 | 237 | 238 | 239 | 240 | 241 | 242 | 243 | 244 | 245 | 246 | 247 | 248 | 249 | 250 | 251 | 252 | 253 | 254 | 255 | 256 | 257 | 258 | 259 | 260 | 261 | 262 | 263 | 264 | 265 | 266 | 267 | 268 | 269 | 270 | 271 | 272 | 273 | 274 | 275 | 276 | 277 | 278 | 279 | 280 | 281 | 282 | 283 | 284 | 285 | 286 | 287 | 288 | 289 | 290 | 291 | 292 | 293 | 294 | 295 | 296 | 297 | 298 | 299 | 300 | 301 | 302 | 303 | 304 | 305 | 306 | 307 | 308 | 309 | 310 | 311 | 312 | 313 | 314 | 315 | 316 | 317 | 318 | 319 | 320 | 321 | 322 | 323 | 324 | 325 | 326 | 327 | 328 | 329 | 330 | 331 | 332 | 333 | 334 | 335 | 336 | 337 | 338 | 339 | 340 | 341 | 342 | 343 | 344 | 345 | 346 | 347 | 348 | 349 | 350 | 351 | 352 | 353 | 354 | 355 | 356 | 357 | 358 | 359 | 360 | 361 | 362 | 363 | 364 | 365 | 366 | 367 | 368 | 369 | 370 | 371 | 372 | 373 | 374 | 375 | 376 | 377 | 378 | 379 | 380 | 381 | 382 | 383 | 384 | 385 | 386 | 387 | 388 | 389 | 390 | 391 | 392 | 393 | 394 | 395 | 396 | 397 | 398 | 399 | 400 | 401 | 402 | 403 | 404 | 405 | 406 | 407 | 408 | 409 | 410 | 411 | 412 | 413 | 414 | 415 | 416 | 417 | 418 | 419 | 420 | 421 | 422 | 423 | 424 | 425 | 426 | 427 | 428 | 429 | 430 | 431 | 432 | 433 | 434 | 435 | 436 | 437 | 438 | 439 | 440 | 441 | 442 | 443 | 444 | 445 | 446 | 447 | 448 | 449 | 450 | 451 | 452 | 453 | 454 | 455 | 456 | 457 | 458 | 459 | 460 | 461 | 462 | 463 | 464 | 465 | 466 | 467 | 468 | 469 | 470 | 471 | 472 | 473 | 474 | 475 | 476 | 477 | 478 | 479 | 480 | 481 | 482 | 483 | 484 | 485 | 486 | 487 | 488 | 489 | 490 | 491 | 492 | 493 | 494 | 495 | 496 | 497 | 498 | 499 | 500 | 501 | 502 | 503 | 504 | 505 | 506 | 507 | 508 | 509 | 510 | 511 | 512 | 513 | 514 | 515 | 516 | 517 | 518 | 519 | 520 | 521 | 522 | 523 | 524 | 525 | 526 | 527 | 528 | 529 | 530 | 531 | 532 | 533 | 534 | 535 | 536 | 537 | 538 | 539 | 540 | 541 | 542 | 543 | 544 | 545 | 546 | 547 | 548 | 549 | 550 | 551 | 552 | 553 | 554 | 555 | 556 | 557 | 558 | 559 | 560 | 561 | 562 | 563 | 564 | 565 | 566 | 567 | 568 | 569 | 570 | 571 | 572 | 573 | 574 | 575 | 576 | 577 | 578 | 579 | 580 | 581 | 582 | 583 | 584 | 585 | 586 | 587 | 588 | 589 | 590 | 591 | 592 | 593 | 594 | 595 | 596 | 597 | 598 | 599 | 600 | 601 | 602 | 603 | 604 | 605 | 606 | 607 | 608 | 609 | 610 | 611 | 612 | 613 | 614 | 615 | 616 | 617 | 618 | 619 | 620 | 621 | 622 | 623 | 624 | 625 | 626 | 627 | 628 | 629 | 630 | 631 | 632 | 633 | 634 | 635 | 636 | 637 | 638 | 639 | 640 | 641 | 642 | 643 | 644 | 645 | 646 | 647 | 648 | 649 | 650 | 651 | 652 | 653 | 654 | 655 | 656 | 657 | 658 | 659 | 660 | 661 | 662 | 663 | 664 | 665 | 666 | 667 | 668 | 669 | 670 | 671 | 672 | 673 | 674 | 675 | 676 | 677 | 678 | 679 | 680 | 681 | 682 | 683 | 684 | 685 | 686 | 687 | 688 | 689 | 690 | 691 | 692 | 693 | 694 | 695 | 696 | 697 | 698 | 699 | 700 | 701 | 702 | 703 | 704 | 705 | 706 | 707 | 708 | 709 | 710 | 711 | 712 | 713 | 714 | 715 | 716 | 717 | 718 | 719 | 720 | 721 | 722 | 723 | 724 | 725 | 726 | 727 | 728 | 729 | 730 | 731 | 732 | 733 | 734 | 735 | 736 | 737 | 738 | 739 | 740 | 741 | 742 | 743 | 744 | 745 | 746 | 747 | 748 | 749 | 750 | 751 | 752 | 753 | 754 | 755 | 756 | 757 | 758 | 759 | 760 | 761 | 762 | 763 | 764 | 765 | 766 | 767 | 768 | 769 | 770 | 771 | 772 | 773 | 774 | 775 | 776 | 777 | 778 | 779 | 780 | 781 | 782 | 783 | 784 | 785 | 786 | 787 | 788 | 789 | 790 | 791 | 792 | 793 | 794 | 795 | 796 | 797 | 798 | 799 | 800 | 801 | 802 | 803 | 804 | 805 | 806 | 807 | 808 | 809 | 810 | 811 | 812 | 813 | 814 | 815 | 816 | 817 | 818 | 819 | 820 | 821 | 822 | 823 | 824 | 825 | 826 | 827 | 828 | 829 | 830 | 831 | 832 | 833 | 834 | 835 | 836 | 837 | 838 | 839 | 840 | 841 | 842 | 843 | 844 | 845 | 846 | 847 | 848 | 849 | 850 | 851 | 852 | 853 | 854 | 855 | 856 | 857 | 858 | 859 | 860 | 861 | 862 | 863 | 864 | 865 | 866 | 867 | 868 | 869 | 870 | 871 | 872 | 873 | 874 | 875 | 876 | 877 | 878 | 879 | 880 | 881 | 882 | 883 | 884 | 885 | 886 | 887 | 888 | 889 | 890 | 891 | 892 | 893 | 894 | 895 | 896 | 897 | 898 | 899 | 900 | 901 | 902 | 903 | 904 | 905 | 906 | 907 | 908 | 909 | 910 | 911 | 912 | 913 | 914 | 915 | 916 | 917 | 918 | 919 | 920 | 921 | 922 | 923 | 924 | 925 | 926 | 927 | 928 | 929 | 930 | 931 | 932 | 933 | 934 | 935 | 936 | 937 | 938 | 939 | 940 | 941 | 942 | 943 | 944 | 945 | 946 | 947 | 948 | 949 | 950 | 951 | 952 | 953 | 954 | 955 | 956 | 957 | 958 | 959 | 960 | 961 | 962 | 963 | 964 | 965 | 966 | 967 | 968 | 969 | 970 | 971 | 972 | 973 | 974 | 975 | 976 | 977 | 978 | 979 | 980 | 981 | 982 | 983 | 984 | 985 | 986 | 987 | 988 | 989 | 990 | 991 | 992 | 993 | 994 | 995 | 996 | 997 | 998 | 999 | 1000 | 1001 | 1002 | 1003 | 1004 | 1005 | 1006 | 1007 | 1008 | 1009 | 1010 | 1011 | 1012 | 1013 | 1014 | 1015 | 1016 | 1017 | 1018 | 1019 | 1020 | 1021 | 1022 | 1023 | 1024 | 1025 | 1026 | 1027 | 1028 | 1029 | 1030 | 1031 | 1032 | 1033 | 1034 | 1035 | 1036 | 1037 | 1038 | 1039 | 1040 | 1041 | 1042 | 1043 | 1044 | 1045 | 1046 | 1047 | 1048 | 1049 | 1050 | 1051 | 1052 | 1053 | 1054 | 1055 | 1056 | 1057 | 1058 | 1059 | 1060 | 1061 | 1062 | 1063 | 1064 | 1065 | 1066 | 1067 | 1068 | 1069 | 1070 | 1071 | 1072 | 1073 | 1074 | 1075 | 1076 | 1077 | 1078 | 1079 | 1080 | 1081 | 1082 | 1083 | 1084 | 1085 | 1086 | 1087 | 1088 | 1089 | 1090 | 1091 | 1092 | 1093 | 1094 | 1095 | 1096 | 1097 | 1098 | 1099 | 1100 | 1101 | 1102 | 1103 | 1104 | 1105 | 1106 | 1107 | 1108 | 1109 | 1110 | 1111 | 1112 | 1113 | 1114 | 1115 | 1116 | 1117 | 1118 | 1119 | 1120 | 1121 | 1122 | 1123 | 1124 | 1125 | 1126 | 1127 | 1128 | 1129 | 1130 | 1131 | 1132 | 1133 | 1134 | 1135 | 1136 | 1137 | 1138 | 1139 | 1140 | 1141 | 1142 | 1143 | 1144 | 1145 | 1146 | 1147 | 1148 | 1149 | 1150 | 1151 | 1152 | 1153 | 1154 | 1155 | 1156 | 1157 | 1158 | 1159 | 1160 | 1161 | 1162 | 1163 | 1164 | 1165 | 1166 | 1167 | 1168 | 1169 | 1170 | 1171 | 1172 | 1173 | 1174 | 1175 | 1176 | 1177 | 1178 | 1179 | 1180 | 1181 | 1182 | 1183 | 1184 | 1185 | 1186 | 1187 | 1188 | 1189 | 1190 | 1191 | 1192 | 1193 | 1194 | 1195 | 1196 | 1197 | 1198 | 1199 | 1200 | 1201 | 1202 | 1203 | 1204 | 1205 | 1206 | 1207 | 1208 | 1209 | 1210 | 1211 | 1212 | 1213 | 1214 | 1215 | 1216 | 1217 | 1218 | 1219 | 1220 | 1221 | 1222 | 1223 | 1224 | 1225 | 1226 | 1227 | 1228 | 1229 | 1230 | 1231 | 1232 | 1233 | 1234 | 1235 | 1236 | 1237 | 1238 | 1239 | 1240 | 1241 | 1242 | 1243 | 1244 | 1245 | 1246 | 1247 | 1248 | 1249 | 1250 | 1251 | 1252 | 1253 | 1254 | 1255 | 1256 | 1257 | 1258 | 1259 | 1260 | 1261 | 1262 | 1263 | 1264 | 1265 | 1266 | 1267 | 1268 | 1269 | 1270 | 1271 | 1272 | 1273 | 1274 | 1275 | 1276 | 1277 | 1278 | 1279 | 1280 | 1281 | 1282 | 1283 | 1284 | 1285 | 1286 | 1287 | 1288 | 1289 | 1290 | 1291 | 1292 | 1293 | 1294 | 1295 | 1296 | 1297 | 1298 | 1299 | 1300 | 1301 | 1302 | 1303 | 1304 | 1305 | 1306 | 1307 | 1308 | 1309 | 1310 | 1311 | 1312 | 1313 | 1314 | 1315 | 1316 | 1317 | 1318 | 1319 | 1320 | 1321 | 1322 | 1323 | 1324 | 1325 | 1326 | 1327 | 1328 | 1329 | 1330 | 1331 | 1332 | 1333 | 1334 | 1335 | 1336 | 1337 | 1338 | 1339 | 1340 | 1341 | 1342 | 1343 | 1344 | 1345 | 1346 | 1347 | 1348 | 1349 | 1350 | 1351 | 1352 | 1353 | 1354 | 1355 | 1356 | 1357 | 1358 | 1359 | 1360 | 1361 | 1362 | 1363 | 1364 | 1365 | 1366 | 1367 | 1368 | 1369 | 1370 | 1371 | 1372 | 1373 | 1374 | 1375 | 1376 | 1377 | 1378 | 1379 | 1380 | 1381 | 1382 | 1383 | 1384 | 1385 | 1386 | 1387 | 1388 | 1389 | 1390 | 1391 | 1392 | 1393 | 1394 | 1395 | 1396 | 1397 | 1398 | 1399 | 1400 | 1401 | 1402 | 1403 | 1404 | 1405 | 1406 | 1407 | 1408 | 1409 | 1410 | 1411 | 1412 | 1413 | 1414 | 1415 | 1416 | 1417 | 1418 | 1419 | 1420 | 1421 | 1422 | 1423 | 1424 | 1425 | 1426 | 1427 | 1428 | 1429 | 1430 | 1431 | 1432 | 1433 | 1434 | 1435 | 1436 | 1437 | 1438 | 1439 | 1440 | 1441 | 1442 | 1443 | 1444 | 1445 | 1446 | 1447 | 1448 | 1449 | 1450 | 1451 | 1452 | 1453 | 1454 | 1455 | 1456 | 1457 | 1458 | 1459 | 1460 | 1461 | 1462 | 1463 | 1464 | 1465 | 1466 | 1467 | 1468 | 1469 | 1470 | 1471 | 1472 | 1473 | 1474 | 1475 | 1476 | 1477 | 1478 | 1479 | 1480 | 1481 | 1482 | 1483 | 1484 | 1485 | 1486 | 1487 | 1488 | 1489 | 1490 | 1491 | 1492 | 1493 | 1494 | 14 |
|----|----|----|----|----|----|----|----|----|----|----|----|----|----|----|----|----|----|----|----|----|----|----|----|----|----|----|----|----|----|----|----|----|----|----|----|----|----|----|----|----|----|----|----|----|----|----|----|----|----|----|----|----|----|----|----|----|----|----|----|----|----|----|----|----|----|----|----|----|----|----|----|----|----|----|----|----|----|----|----|----|----|----|----|----|----|----|----|----|-----|-----|-----|-----|-----|-----|-----|-----|-----|-----|-----|-----|-----|-----|-----|-----|-----|-----|-----|-----|-----|-----|-----|-----|-----|-----|-----|-----|-----|-----|-----|-----|-----|-----|-----|-----|-----|-----|-----|-----|-----|-----|-----|-----|-----|-----|-----|-----|-----|-----|-----|-----|-----|-----|-----|-----|-----|-----|-----|-----|-----|-----|-----|-----|-----|-----|-----|-----|-----|-----|-----|-----|-----|-----|-----|-----|-----|-----|-----|-----|-----|-----|-----|-----|-----|-----|-----|-----|-----|-----|-----|-----|-----|-----|-----|-----|-----|-----|-----|-----|-----|-----|-----|-----|-----|-----|-----|-----|-----|-----|-----|-----|-----|-----|-----|-----|-----|-----|-----|-----|-----|-----|-----|-----|-----|-----|-----|-----|-----|-----|-----|-----|-----|-----|-----|-----|-----|-----|-----|-----|-----|-----|-----|-----|-----|-----|-----|-----|-----|-----|-----|-----|-----|-----|-----|-----|-----|-----|-----|-----|-----|-----|-----|-----|-----|-----|-----|-----|-----|-----|-----|-----|-----|-----|-----|-----|-----|-----|-----|-----|-----|-----|-----|-----|-----|-----|-----|-----|-----|-----|-----|-----|-----|-----|-----|-----|-----|-----|-----|-----|-----|-----|-----|-----|-----|-----|-----|-----|-----|-----|-----|-----|-----|-----|-----|-----|-----|-----|-----|-----|-----|-----|-----|-----|-----|-----|-----|-----|-----|-----|-----|-----|-----|-----|-----|-----|-----|-----|-----|-----|-----|-----|-----|-----|-----|-----|-----|-----|-----|-----|-----|-----|-----|-----|-----|-----|-----|-----|-----|-----|-----|-----|-----|-----|-----|-----|-----|-----|-----|-----|-----|-----|-----|-----|-----|-----|-----|-----|-----|-----|-----|-----|-----|-----|-----|-----|-----|-----|-----|-----|-----|-----|-----|-----|-----|-----|-----|-----|-----|-----|-----|-----|-----|-----|-----|-----|-----|-----|-----|-----|-----|-----|-----|-----|-----|-----|-----|-----|-----|-----|-----|-----|-----|-----|-----|-----|-----|-----|-----|-----|-----|-----|-----|-----|-----|-----|-----|-----|-----|-----|-----|-----|-----|-----|-----|-----|-----|-----|-----|-----|-----|-----|-----|-----|-----|-----|-----|-----|-----|-----|-----|-----|-----|-----|-----|-----|-----|-----|-----|-----|-----|-----|-----|-----|-----|-----|-----|-----|-----|-----|-----|-----|-----|-----|-----|-----|-----|-----|-----|-----|-----|-----|-----|-----|-----|-----|-----|-----|-----|-----|-----|-----|-----|-----|-----|-----|-----|-----|-----|-----|-----|-----|-----|-----|-----|-----|-----|-----|-----|-----|-----|-----|-----|-----|-----|-----|-----|-----|-----|-----|-----|-----|-----|-----|-----|-----|-----|-----|-----|-----|-----|-----|-----|-----|-----|-----|-----|-----|-----|-----|-----|-----|-----|-----|-----|-----|-----|-----|-----|-----|-----|-----|-----|-----|-----|-----|-----|-----|-----|-----|-----|-----|-----|-----|-----|-----|-----|-----|-----|-----|-----|-----|-----|-----|-----|-----|-----|-----|-----|-----|-----|-----|-----|-----|-----|-----|-----|-----|-----|-----|-----|-----|-----|-----|-----|-----|-----|-----|-----|-----|-----|-----|-----|-----|-----|-----|-----|-----|-----|-----|-----|-----|-----|-----|-----|-----|-----|-----|-----|-----|-----|-----|-----|-----|-----|-----|-----|-----|-----|-----|-----|-----|-----|-----|-----|-----|-----|-----|-----|-----|-----|-----|-----|-----|-----|-----|-----|-----|-----|-----|-----|-----|-----|-----|-----|-----|-----|-----|-----|-----|-----|-----|-----|-----|-----|-----|-----|-----|-----|-----|-----|-----|-----|-----|-----|-----|-----|-----|-----|-----|-----|-----|-----|-----|-----|-----|-----|-----|-----|-----|-----|-----|-----|-----|-----|-----|-----|-----|-----|-----|-----|-----|-----|-----|-----|-----|-----|-----|-----|-----|-----|-----|-----|-----|-----|-----|-----|-----|-----|-----|-----|-----|-----|-----|-----|-----|-----|-----|-----|-----|-----|-----|-----|-----|-----|-----|-----|-----|-----|-----|-----|-----|-----|-----|-----|-----|-----|-----|-----|-----|-----|-----|-----|-----|-----|-----|-----|-----|-----|-----|-----|-----|-----|-----|-----|-----|-----|-----|-----|-----|-----|-----|-----|-----|-----|-----|-----|-----|-----|-----|-----|-----|-----|-----|-----|-----|-----|-----|-----|-----|-----|-----|-----|-----|-----|-----|-----|-----|-----|-----|-----|-----|-----|-----|-----|-----|-----|-----|-----|-----|-----|-----|-----|-----|-----|-----|-----|-----|-----|-----|-----|-----|-----|-----|-----|-----|-----|-----|-----|-----|-----|-----|-----|-----|-----|-----|-----|-----|-----|-----|-----|-----|-----|-----|-----|-----|-----|-----|-----|-----|-----|-----|-----|-----|-----|-----|-----|-----|-----|-----|-----|-----|-----|-----|-----|-----|-----|-----|-----|-----|-----|-----|-----|-----|-----|-----|-----|-----|-----|-----|-----|-----|-----|-----|-----|-----|-----|-----|-----|-----|-----|-----|-----|-----|-----|-----|-----|-----|-----|-----|-----|-----|-----|-----|-----|-----|-----|-----|-----|-----|-----|-----|-----|-----|-----|-----|-----|-----|-----|-----|-----|-----|-----|-----|-----|-----|-----|-----|-----|-----|-----|-----|-----|-----|-----|-----|-----|-----|-----|-----|-----|-----|-----|-----|-----|-----|-----|-----|-----|-----|-----|-----|-----|-----|-----|-----|-----|-----|-----|-----|-----|-----|-----|-----|-----|-----|-----|-----|-----|-----|-----|-----|-----|-----|-----|-----|-----|-----|-----|-----|-----|-----|-----|-----|-----|-----|-----|-----|-----|-----|------|------|------|------|------|------|------|------|------|------|------|------|------|------|------|------|------|------|------|------|------|------|------|------|------|------|------|------|------|------|------|------|------|------|------|------|------|------|------|------|------|------|------|------|------|------|------|------|------|------|------|------|------|------|------|------|------|------|------|------|------|------|------|------|------|------|------|------|------|------|------|------|------|------|------|------|------|------|------|------|------|------|------|------|------|------|------|------|------|------|------|------|------|------|------|------|------|------|------|------|------|------|------|------|------|------|------|------|------|------|------|------|------|------|------|------|------|------|------|------|------|------|------|------|------|------|------|------|------|------|------|------|------|------|------|------|------|------|------|------|------|------|------|------|------|------|------|------|------|------|------|------|------|------|------|------|------|------|------|------|------|------|------|------|------|------|------|------|------|------|------|------|------|------|------|------|------|------|------|------|------|------|------|------|------|------|------|------|------|------|------|------|------|------|------|------|------|------|------|------|------|------|------|------|------|------|------|------|------|------|------|------|------|------|------|------|------|------|------|------|------|------|------|------|------|------|------|------|------|------|------|------|------|------|------|------|------|------|------|------|------|------|------|------|------|------|------|------|------|------|------|------|------|------|------|------|------|------|------|------|------|------|------|------|------|------|------|------|------|------|------|------|------|------|------|------|------|------|------|------|------|------|------|------|------|------|------|------|------|------|------|------|------|------|------|------|------|------|------|------|------|------|------|------|------|------|------|------|------|------|------|------|------|------|------|------|------|------|------|------|------|------|------|------|------|------|------|------|------|------|------|------|------|------|------|------|------|------|------|------|------|------|------|------|------|------|------|------|------|------|------|------|------|------|------|------|------|------|------|------|------|------|------|------|------|------|------|------|------|------|------|------|------|------|------|------|------|------|------|------|------|------|------|------|------|------|------|------|------|------|------|------|------|------|------|------|------|------|------|------|------|------|------|------|------|------|------|------|------|------|------|------|------|------|------|------|------|------|------|------|------|------|------|------|------|------|------|------|------|------|------|------|------|------|------|------|------|------|------|------|------|------|------|------|------|------|------|------|------|------|------|------|------|------|------|------|------|------|------|------|------|------|------|------|------|------|------|------|------|------|------|------|------|------|------|------|------|------|------|------|------|------|------|------|------|------|------|------|------|------|------|------|------|------|------|----|
|----|----|----|----|----|----|----|----|----|----|----|----|----|----|----|----|----|----|----|----|----|----|----|----|----|----|----|----|----|----|----|----|----|----|----|----|----|----|----|----|----|----|----|----|----|----|----|----|----|----|----|----|----|----|----|----|----|----|----|----|----|----|----|----|----|----|----|----|----|----|----|----|----|----|----|----|----|----|----|----|----|----|----|----|----|----|----|----|----|-----|-----|-----|-----|-----|-----|-----|-----|-----|-----|-----|-----|-----|-----|-----|-----|-----|-----|-----|-----|-----|-----|-----|-----|-----|-----|-----|-----|-----|-----|-----|-----|-----|-----|-----|-----|-----|-----|-----|-----|-----|-----|-----|-----|-----|-----|-----|-----|-----|-----|-----|-----|-----|-----|-----|-----|-----|-----|-----|-----|-----|-----|-----|-----|-----|-----|-----|-----|-----|-----|-----|-----|-----|-----|-----|-----|-----|-----|-----|-----|-----|-----|-----|-----|-----|-----|-----|-----|-----|-----|-----|-----|-----|-----|-----|-----|-----|-----|-----|-----|-----|-----|-----|-----|-----|-----|-----|-----|-----|-----|-----|-----|-----|-----|-----|-----|-----|-----|-----|-----|-----|-----|-----|-----|-----|-----|-----|-----|-----|-----|-----|-----|-----|-----|-----|-----|-----|-----|-----|-----|-----|-----|-----|-----|-----|-----|-----|-----|-----|-----|-----|-----|-----|-----|-----|-----|-----|-----|-----|-----|-----|-----|-----|-----|-----|-----|-----|-----|-----|-----|-----|-----|-----|-----|-----|-----|-----|-----|-----|-----|-----|-----|-----|-----|-----|-----|-----|-----|-----|-----|-----|-----|-----|-----|-----|-----|-----|-----|-----|-----|-----|-----|-----|-----|-----|-----|-----|-----|-----|-----|-----|-----|-----|-----|-----|-----|-----|-----|-----|-----|-----|-----|-----|-----|-----|-----|-----|-----|-----|-----|-----|-----|-----|-----|-----|-----|-----|-----|-----|-----|-----|-----|-----|-----|-----|-----|-----|-----|-----|-----|-----|-----|-----|-----|-----|-----|-----|-----|-----|-----|-----|-----|-----|-----|-----|-----|-----|-----|-----|-----|-----|-----|-----|-----|-----|-----|-----|-----|-----|-----|-----|-----|-----|-----|-----|-----|-----|-----|-----|-----|-----|-----|-----|-----|-----|-----|-----|-----|-----|-----|-----|-----|-----|-----|-----|-----|-----|-----|-----|-----|-----|-----|-----|-----|-----|-----|-----|-----|-----|-----|-----|-----|-----|-----|-----|-----|-----|-----|-----|-----|-----|-----|-----|-----|-----|-----|-----|-----|-----|-----|-----|-----|-----|-----|-----|-----|-----|-----|-----|-----|-----|-----|-----|-----|-----|-----|-----|-----|-----|-----|-----|-----|-----|-----|-----|-----|-----|-----|-----|-----|-----|-----|-----|-----|-----|-----|-----|-----|-----|-----|-----|-----|-----|-----|-----|-----|-----|-----|-----|-----|-----|-----|-----|-----|-----|-----|-----|-----|-----|-----|-----|-----|-----|-----|-----|-----|-----|-----|-----|-----|-----|-----|-----|-----|-----|-----|-----|-----|-----|-----|-----|-----|-----|-----|-----|-----|-----|-----|-----|-----|-----|-----|-----|-----|-----|-----|-----|-----|-----|-----|-----|-----|-----|-----|-----|-----|-----|-----|-----|-----|-----|-----|-----|-----|-----|-----|-----|-----|-----|-----|-----|-----|-----|-----|-----|-----|-----|-----|-----|-----|-----|-----|-----|-----|-----|-----|-----|-----|-----|-----|-----|-----|-----|-----|-----|-----|-----|-----|-----|-----|-----|-----|-----|-----|-----|-----|-----|-----|-----|-----|-----|-----|-----|-----|-----|-----|-----|-----|-----|-----|-----|-----|-----|-----|-----|-----|-----|-----|-----|-----|-----|-----|-----|-----|-----|-----|-----|-----|-----|-----|-----|-----|-----|-----|-----|-----|-----|-----|-----|-----|-----|-----|-----|-----|-----|-----|-----|-----|-----|-----|-----|-----|-----|-----|-----|-----|-----|-----|-----|-----|-----|-----|-----|-----|-----|-----|-----|-----|-----|-----|-----|-----|-----|-----|-----|-----|-----|-----|-----|-----|-----|-----|-----|-----|-----|-----|-----|-----|-----|-----|-----|-----|-----|-----|-----|-----|-----|-----|-----|-----|-----|-----|-----|-----|-----|-----|-----|-----|-----|-----|-----|-----|-----|-----|-----|-----|-----|-----|-----|-----|-----|-----|-----|-----|-----|-----|-----|-----|-----|-----|-----|-----|-----|-----|-----|-----|-----|-----|-----|-----|-----|-----|-----|-----|-----|-----|-----|-----|-----|-----|-----|-----|-----|-----|-----|-----|-----|-----|-----|-----|-----|-----|-----|-----|-----|-----|-----|-----|-----|-----|-----|-----|-----|-----|-----|-----|-----|-----|-----|-----|-----|-----|-----|-----|-----|-----|-----|-----|-----|-----|-----|-----|-----|-----|-----|-----|-----|-----|-----|-----|-----|-----|-----|-----|-----|-----|-----|-----|-----|-----|-----|-----|-----|-----|-----|-----|-----|-----|-----|-----|-----|-----|-----|-----|-----|-----|-----|-----|-----|-----|-----|-----|-----|-----|-----|-----|-----|-----|-----|-----|-----|-----|-----|-----|-----|-----|-----|-----|-----|-----|-----|-----|-----|-----|-----|-----|-----|-----|-----|-----|-----|-----|-----|-----|-----|-----|-----|-----|-----|-----|-----|-----|-----|-----|-----|-----|-----|-----|-----|-----|-----|-----|-----|-----|-----|-----|-----|-----|-----|-----|-----|-----|-----|-----|-----|-----|-----|-----|-----|-----|-----|-----|-----|-----|-----|-----|-----|-----|-----|-----|-----|-----|-----|-----|-----|-----|-----|-----|-----|-----|-----|-----|-----|-----|-----|-----|-----|-----|-----|-----|-----|-----|-----|-----|-----|-----|-----|-----|-----|-----|-----|-----|-----|-----|-----|-----|-----|-----|-----|-----|-----|-----|-----|-----|-----|-----|-----|-----|-----|-----|-----|-----|-----|-----|-----|-----|-----|-----|-----|-----|-----|-----|-----|-----|-----|-----|-----|-----|-----|-----|-----|-----|-----|-----|-----|-----|-----|-----|-----|-----|-----|-----|-----|-----|-----|-----|-----|-----|-----|-----|------|------|------|------|------|------|------|------|------|------|------|------|------|------|------|------|------|------|------|------|------|------|------|------|------|------|------|------|------|------|------|------|------|------|------|------|------|------|------|------|------|------|------|------|------|------|------|------|------|------|------|------|------|------|------|------|------|------|------|------|------|------|------|------|------|------|------|------|------|------|------|------|------|------|------|------|------|------|------|------|------|------|------|------|------|------|------|------|------|------|------|------|------|------|------|------|------|------|------|------|------|------|------|------|------|------|------|------|------|------|------|------|------|------|------|------|------|------|------|------|------|------|------|------|------|------|------|------|------|------|------|------|------|------|------|------|------|------|------|------|------|------|------|------|------|------|------|------|------|------|------|------|------|------|------|------|------|------|------|------|------|------|------|------|------|------|------|------|------|------|------|------|------|------|------|------|------|------|------|------|------|------|------|------|------|------|------|------|------|------|------|------|------|------|------|------|------|------|------|------|------|------|------|------|------|------|------|------|------|------|------|------|------|------|------|------|------|------|------|------|------|------|------|------|------|------|------|------|------|------|------|------|------|------|------|------|------|------|------|------|------|------|------|------|------|------|------|------|------|------|------|------|------|------|------|------|------|------|------|------|------|------|------|------|------|------|------|------|------|------|------|------|------|------|------|------|------|------|------|------|------|------|------|------|------|------|------|------|------|------|------|------|------|------|------|------|------|------|------|------|------|------|------|------|------|------|------|------|------|------|------|------|------|------|------|------|------|------|------|------|------|------|------|------|------|------|------|------|------|------|------|------|------|------|------|------|------|------|------|------|------|------|------|------|------|------|------|------|------|------|------|------|------|------|------|------|------|------|------|------|------|------|------|------|------|------|------|------|------|------|------|------|------|------|------|------|------|------|------|------|------|------|------|------|------|------|------|------|------|------|------|------|------|------|------|------|------|------|------|------|------|------|------|------|------|------|------|------|------|------|------|------|------|------|------|------|------|------|------|------|------|------|------|------|------|------|------|------|------|------|------|------|------|------|------|------|------|------|------|------|------|------|------|------|------|------|------|------|------|------|------|------|------|------|------|------|------|------|------|------|------|------|------|------|------|------|------|------|------|------|------|------|------|------|------|------|------|------|------|------|------|------|------|------|------|------|------|------|------|------|------|------|------|------|------|----|

## MMs

| 1 | 2 | 3 | 4 | 5 | 6 | 7 | 8 | 9 | 10 | 11 | 12 | 13 | 14 | 15 | 16 | 17 | 18 | 19 | 20 | 21 | 22 | 23 | 24 | 25 | 26 | 27 | 28 | 29 | 30 | 31 | 32 | 33 | 34 | 35 | 36 | 37 | 38 | 39 | 40 | 41 | 42 | 43 | 44 | 45 | 46 | 47 | 48 | 49 | 50 | 51 | 52 | 53 | 54 | 55 | 56 | 57 | 58 | 59 | 60 | 61 | 62 | 63 | 64 | 65 | 66 | 67 | 68 | 69 | 70 | 71 | 72 | 73 | 74 | 75 | 76 | 77 | 78 | 79 | 80 | 81 | 82 | 83 | 84 | 85 | 86 | 87 | 88 | 89 | 90 | 91 | 92 | 93 | 94 | 95 | 96 | 97 | 98 | 99 | 100 | 101 | 102 | 103 | 104 | 105 | 106 | 107 | 108 | 109 | 110 | 111 | 112 | 113 | 114 | 115 | 116 | 117 | 118 | 119 | 120 | 121 | 122 | 123 | 124 | 125 | 126 | 127 | 128 | 129 | 130 | 131 | 132 | 133 | 134 | 135 | 136 | 137 | 138 | 139 | 140 | 141 | 142 | 143 | 144 | 145 | 146 | 147 | 148 | 149 | 150 | 151 | 152 | 153 | 154 | 155 | 156 | 157 | 158 | 159 | 160 | 161 | 162 | 163 | 164 | 165 | 166 | 167 | 168 | 169 | 170 | 171 | 172 | 173 | 174 | 175 | 176 | 177 | 178 | 179 | 180 | 181 | 182 | 183 | 184 | 185 | 186 | 187 | 188 | 189 | 190 | 191 | 192 | 193 | 194 | 195 | 196 | 197 | 198 | 199 | 200 | 201 | 202 | 203 | 204 | 205 | 206 | 207 | 208 | 209 | 210 | 211 | 212 | 213 | 214 | 215 | 216 | 217 | 218 | 219 | 220 | 221 | 222 | 223 | 224 | 225 | 226 | 227 | 228 | 229 | 230 | 231 | 232 | 233 | 234 | 235 | 236 | 237 | 238 | 239 | 240 | 241 | 242 | 243 | 244 | 245 | 246 | 247 | 248 | 249 | 250 | 251 | 252 | 253 | 254 | 255 | 256 | 257 | 258 | 259 | 260 | 261 | 262 | 263 | 264 | 265 | 266 | 267 | 268 | 269 | 270 | 271 | 272 | 273 | 274 | 275 | 276 | 277 | 278 | 279 | 280 | 281 | 282 | 283 | 284 | 285 | 286 | 287 | 288 | 289 | 290 | 291 | 292 | 293 | 294 | 295 | 296 | 297 | 298 | 299 | 300 | 301 | 302 | 303 | 304 | 305 | 306 | 307 | 308 | 309 | 310 | 311 | 312 | 313 | 314 | 315 | 316 | 317 | 318 | 319 | 320 | 321 | 322 | 323 | 324 | 325 | 326 | 327 | 328 | 329 | 330 | 331 | 332 | 333 | 334 | 335 | 336 | 337 | 338 | 339 | 340 | 341 | 342 | 343 | 344 | 345 | 346 | 347 | 348 | 349 | 350 | 351 | 352 | 353 | 354 | 355 | 356 | 357 | 358 | 359 | 360 | 361 | 362 | 363 | 364 | 365 | 366 | 367 | 368 | 369 | 370 | 371 | 372 | 373 | 374 | 375 | 376 | 377 | 378 | 379 | 380 | 381 | 382 | 383 | 384 | 385 | 386 | 387 | 388 | 389 | 390 | 391 | 392 | 393 | 394 | 395 | 396 | 397 | 398 | 399 | 400 | 401 | 402 | 403 | 404 | 405 | 406 | 407 | 408 | 409 | 410 | 411 | 412 | 413 | 414 | 415 | 416 | 417 | 418 | 419 | 420 | 421 | 422 | 423 | 424 | 425 | 426 | 427 | 428 | 429 | 430 | 431 | 432 | 433 | 434 | 435 | 436 | 437 | 438 | 439 | 440 | 441 | 442 | 443 | 444 | 445 | 446 | 447 | 448 | 449 | 450 | 451 | 452 | 453 | 454 | 455 | 456 | 457 | 458 | 459 | 460 | 461 | 462 | 463 | 464 | 465 | 466 | 467 | 468 | 469 | 470 | 471 | 472 | 473 | 474 | 475 | 476 | 477 | 478 | 479 | 480 | 481 | 482 | 483 | 484 | 485 | 486 | 487 | 488 | 489 | 490 | 491 | 492 | 493 | 494 | 495 | 496 | 497 | 498 | 499 | 500 | 501 | 502 | 503 | 504 | 505 | 506 | 507 | 508 | 509 | 510 | 511 | 512 | 513 | 514 | 515 | 516 | 517 | 518 | 519 | 520 | 521 | 522 | 523 | 524 | 525 | 526 | 527 | 528 | 529 | 530 | 531 | 532 | 533 | 534 | 535 | 536 | 537 | 538 | 539 | 540 | 541 | 542 | 543 | 544 | 545 | 546 | 547 | 548 | 549 | 550 | 551 | 552 | 553 | 554 | 555 | 556 | 557 | 558 | 559 | 560 | 561 | 562 | 563 | 564 | 565 | 566 | 567 | 568 | 569 | 570 | 571 | 572 | 573 | 574 | 575 | 576 | 577 | 578 | 579 | 580 | 581 | 582 | 583 | 584 | 585 | 586 | 587 | 588 | 589 | 590 | 591 | 592 | 593 | 594 | 595 | 596 | 597 | 598 | 599 | 600 | 601 | 602 | 603 | 604 | 605 | 606 | 607 | 608 | 609 | 610 | 611 | 612 | 613 | 614 | 615 | 616 | 617 | 618 | 619 | 620 | 621 | 622 | 623 | 624 | 625 | 626 | 627 | 628 | 629 | 630 | 631 | 632 | 633 | 634 | 635 | 636 | 637 | 638 | 639 | 640 | 641 | 642 | 643 | 644 | 645 | 646 | 647 | 648 | 649 | 650 | 651 | 652 | 653 | 654 | 655 | 656 | 657 | 658 | 659 | 660 | 661 | 662 | 663 | 664 | 665 | 666 | 667 | 668 | 669 | 670 | 671 | 672 | 673 | 674 | 675 | 676 | 677 | 678 | 679 | 680 | 681 | 682 | 683 | 684 | 685 | 686 | 687 | 688 | 689 | 690 | 691 | 692 | 693 | 694 | 695 | 696 | 697 | 698 | 699 | 700 | 701 | 702 | 703 | 704 | 705 | 706 | 707 | 708 | 709 | 710 | 711 | 712 | 713 | 714 | 715 | 716 | 717 | 718 | 719 | 720 | 721 | 722 | 723 | 724 | 725 | 726 | 727 | 728 | 729 | 730 | 731 | 732 | 733 | 734 | 735 | 736 | 737 | 738 | 739 | 740 | 741 | 742 | 743 | 744 | 745 | 746 | 747 | 748 | 749 | 750 | 751 | 752 | 753 | 754 | 755 | 756 | 757 | 758 | 759 | 760 | 761 | 762 | 763 | 764 | 765 | 766 | 767 | 768 | 769 | 770 | 771 | 772 | 773 | 774 | 775 | 776 | 777 | 778 | 779 | 780 | 781 | 782 | 783 | 784 | 785 | 786 | 787 | 788 | 789 | 790 | 791 | 792 | 793 | 794 | 795 | 796 | 797 | 798 | 799 | 800 | 801 | 802 | 803 | 804 | 805 | 806 | 807 | 808 | 809 | 810 | 811 | 812 | 813 | 814 | 815 | 816 | 817 | 818 | 819 | 820 | 821 | 822 | 823 | 824 | 825 | 826 | 827 | 828 | 829 | 830 | 831 | 832 | 833 | 834 | 835 | 836 | 837 | 838 | 839 | 840 | 841 | 842 | 843 | 844 | 845 | 846 | 847 | 848 | 849 | 850 | 851 | 852 | 853 | 854 | 855 | 856 | 857 | 858 | 859 | 860 | 861 | 862 | 863 | 864 | 865 | 866 | 867 | 868 | 869 | 870 | 871 | 872 | 873 | 874 | 875 | 876 | 877 | 878 | 879 | 880 | 881 | 882 | 883 | 884 | 885 | 886 | 887 | 888 | 889 | 890 | 891 | 892 | 893 | 894 | 895 | 896 | 897 | 898 | 899 | 900 | 901 | 902 | 903 | 904 | 905 | 906 | 907 | 908 | 909 | 910 | 911 | 912 | 913 | 914 | 915 | 916 | 917 | 918 | 919 | 920 | 921 | 922 | 923 | 924 | 925 | 926 | 927 | 928 | 929 | 930 | 931 | 932 | 933 | 934 | 935 | 936 | 937 | 938 | 939 | 940 | 941 | 942 | 943 | 944 | 945 | 946 | 947 | 948 | 949 | 950 | 951 | 952 | 953 | 954 | 955 | 956 | 957 | 958 | 959 | 960 | 961 | 962 | 963 | 964 | 965 | 966 | 967 | 968 | 969 | 970 | 971 | 972 | 973 | 974 | 975 | 976 | 977 | 978 | 979 | 980 | 981 | 982 | 983 | 984 | 985 | 986 | 987 | 988 | 989 | 990 | 991 | 992 | 993 | 994 | 995 | 996 | 997 | 998 | 999 | 1000 | 1001 | 1002 | 1003 | 1004 | 1005 | 1006 | 1007 | 1008 | 1009 | 1010 | 1011 | 1012 | 1013 | 1014 | 1015 | 1016 | 1017 | 1018 | 1019 | 1020 | 1021 | 1022 | 1023 | 1024 | 1025 | 1026 | 1027 | 1028 | 1029 | 1030 | 1031 | 1032 | 1033 | 1034 | 1035 | 1036 | 1037 | 1038 | 1039 | 1040 | 1041 | 1042 | 1043 | 1044 | 1045 | 1046 | 1047 | 1048 | 1049 | 1050 | 1051 | 1052 | 1053 | 1054 | 1055 | 1056 | 1057 | 1058 | 1059 | 1060 | 1061 | 1062 | 1063 | 1064 | 1065 | 1066 | 1067 | 1068 | 1069 | 1070 | 1071 | 1072 | 1073 | 1074 | 1075 | 1076 | 1077 | 1078 | 1079 | 1080 | 1081 | 1082 | 1083 | 1084 | 1085 | 1086 | 1087 | 1088 | 1089 | 1090 | 1091 | 1092 | 1093 | 1094 | 1095 | 1096 | 1097 | 1098 | 1099 | 1100 | 1101 | 1102 | 1103 | 1104 | 1105 | 1106 | 1107 | 1108 | 1109 | 1110 | 1111 | 1112 | 1113 | 1114 | 1115 | 1116 | 1117 | 1118 | 1119 | 1120 | 1121 | 1122 | 1123 | 1124 | 1125 | 1126 | 1127 | 1128 | 1129 | 1130 | 1131 | 1132 | 1133 | 1134 | 1135 | 1136 | 1137 | 1138 | 1139 | 1140 | 1141 | 1142 | 1143 | 1144 | 1145 | 1146 | 1147 | 1148 | 1149 | 1150 | 1151 | 1152 | 1153 | 1154 | 1155 | 1156 | 1157 | 1158 | 1159 | 1160 | 1161 | 1162 | 1163 | 1164 | 1165 | 1166 | 1167 | 1168 | 1169 | 1170 | 1171 | 1172 | 1173 | 1174 | 1175 | 1176 | 1177 | 1178 | 1179 | 1180 | 1181 | 1182 | 1183 | 1184 | 1185 | 1186 | 1187 | 1188 | 1189 | 1190 | 1191 | 1192 | 1193 | 1194 | 1195 | 1196 | 1197 | 1198 | 1199 | 1200 | 1201 | 1202 | 1203 | 1204 | 1205 | 1206 | 1207 | 1208 | 1209 | 1210 | 1211 | 1212 | 1213 | 1214 | 1215 | 1216 | 1217 | 1218 | 1219 | 1220 | 1221 | 1222 | 1223 | 1224 | 1225 | 1226 | 1227 | 1228 | 1229 | 1230 | 1231 | 1232 | 1233 | 1234 | 1235 | 1236 | 1237 | 1238 | 1239 | 1240 | 1241 | 1242 | 1243 | 1244 | 1245 | 1246 | 1247 | 1248 | 1249 | 1250 | 1251 | 1252 | 1253 | 1254 | 1255 | 1256 | 1257 | 1258 | 1259 | 1260 | 1261 | 1262 | 1263 | 1264 | 1265 | 1266 | 1267 | 1268 | 1269 | 1270 | 1271 | 1272 | 1273 | 1274 | 1275 | 1276 | 1277 | 1278 | 1279 | 1280 | 1281 | 1282 | 1283 | 1284 | 1285 | 1286 | 1287 | 1288 | 1289 | 1290 | 1291 | 1292 | 1293 | 1294 | 1295 | 1296 | 1297 | 1298 | 1299 | 1300 | 1301 | 1302 | 1303 | 1304 | 1305 | 1306 | 1307 | 1308 | 1309 | 1310 | 1311 | 1312 | 1313 | 1314 | 1315 | 1316 | 1317 | 1318 | 1319 | 1320 | 1321 | 1322 | 1323 | 1324 | 1325 | 1326 | 1327 | 1328 | 1329 | 1330 | 1331 | 1332 | 1333 | 1334 | 1335 | 1336 | 1337 | 1338 | 1339 | 1340 | 1341 | 1342 | 1343 | 1344 | 1345 | 1346 | 1347 | 1348 | 1349 | 1350 | 1351 | 1352 | 1353 | 1354 | 1355 | 1356 | 1357 | 1358 | 1359 | 1360 | 1361 | 1362 | 1363 | 1364 | 1365 | 1366 | 1367 | 1368 | 1369 | 1370 | 1371 | 1372 | 1373 | 1374 | 1375 | 1376 | 1377 | 1378 | 1379 | 1380 | 1381 | 1382 | 1383 | 1384 | 1385 | 1386 | 1387 | 1388 | 1389 | 1390 | 1391 | 1392 | 1393 | 1394 | 1395 | 1396 | 1397 | 1398 | 1399 | 1400 | 1401 | 1402 | 1403 | 1404 | 1405 | 1406 | 1407 | 1408 | 1409 | 1410 | 1411 | 1412 | 1413 | 1414 | 1415 | 1416 | 1417 | 1418 | 1419 | 1420 | 1421 | 1422 | 1423 | 1424 | 1425 | 1426 | 1427 | 1428 | 1429 | 1430 | 1431 | 1432 | 1433 | 1434 | 1435 | 1436 | 1437 | 1438 | 1439 | 1440 | 1441 | 1442 | 1443 | 1444 | 1445 | 1446 | 1447 | 1448 | 1449 | 1450 | 1451 | 1452 | 1453 | 1454 | 1455 | 1456 | 1457 | 1458 | 1459 | 1460 | 1461 | 1462 | 1463 | 1464 | 1465 | 1466 | 1467 | 1468 | 1469 | 1470 | 1471 | 1472 | 1473 | 1474 | 1475 | 1476 | 1477 | 1478 | 1479 | 1480 | 1481 | 1482 | 1483 | 1484 | 1485 | 1486 | 1487 | 1488</ |
|---|---|---|---|---|---|---|---|---|----|----|----|----|----|----|----|----|----|----|----|----|----|----|----|----|----|----|----|----|----|----|----|----|----|----|----|----|----|----|----|----|----|----|----|----|----|----|----|----|----|----|----|----|----|----|----|----|----|----|----|----|----|----|----|----|----|----|----|----|----|----|----|----|----|----|----|----|----|----|----|----|----|----|----|----|----|----|----|----|----|----|----|----|----|----|----|----|----|----|-----|-----|-----|-----|-----|-----|-----|-----|-----|-----|-----|-----|-----|-----|-----|-----|-----|-----|-----|-----|-----|-----|-----|-----|-----|-----|-----|-----|-----|-----|-----|-----|-----|-----|-----|-----|-----|-----|-----|-----|-----|-----|-----|-----|-----|-----|-----|-----|-----|-----|-----|-----|-----|-----|-----|-----|-----|-----|-----|-----|-----|-----|-----|-----|-----|-----|-----|-----|-----|-----|-----|-----|-----|-----|-----|-----|-----|-----|-----|-----|-----|-----|-----|-----|-----|-----|-----|-----|-----|-----|-----|-----|-----|-----|-----|-----|-----|-----|-----|-----|-----|-----|-----|-----|-----|-----|-----|-----|-----|-----|-----|-----|-----|-----|-----|-----|-----|-----|-----|-----|-----|-----|-----|-----|-----|-----|-----|-----|-----|-----|-----|-----|-----|-----|-----|-----|-----|-----|-----|-----|-----|-----|-----|-----|-----|-----|-----|-----|-----|-----|-----|-----|-----|-----|-----|-----|-----|-----|-----|-----|-----|-----|-----|-----|-----|-----|-----|-----|-----|-----|-----|-----|-----|-----|-----|-----|-----|-----|-----|-----|-----|-----|-----|-----|-----|-----|-----|-----|-----|-----|-----|-----|-----|-----|-----|-----|-----|-----|-----|-----|-----|-----|-----|-----|-----|-----|-----|-----|-----|-----|-----|-----|-----|-----|-----|-----|-----|-----|-----|-----|-----|-----|-----|-----|-----|-----|-----|-----|-----|-----|-----|-----|-----|-----|-----|-----|-----|-----|-----|-----|-----|-----|-----|-----|-----|-----|-----|-----|-----|-----|-----|-----|-----|-----|-----|-----|-----|-----|-----|-----|-----|-----|-----|-----|-----|-----|-----|-----|-----|-----|-----|-----|-----|-----|-----|-----|-----|-----|-----|-----|-----|-----|-----|-----|-----|-----|-----|-----|-----|-----|-----|-----|-----|-----|-----|-----|-----|-----|-----|-----|-----|-----|-----|-----|-----|-----|-----|-----|-----|-----|-----|-----|-----|-----|-----|-----|-----|-----|-----|-----|-----|-----|-----|-----|-----|-----|-----|-----|-----|-----|-----|-----|-----|-----|-----|-----|-----|-----|-----|-----|-----|-----|-----|-----|-----|-----|-----|-----|-----|-----|-----|-----|-----|-----|-----|-----|-----|-----|-----|-----|-----|-----|-----|-----|-----|-----|-----|-----|-----|-----|-----|-----|-----|-----|-----|-----|-----|-----|-----|-----|-----|-----|-----|-----|-----|-----|-----|-----|-----|-----|-----|-----|-----|-----|-----|-----|-----|-----|-----|-----|-----|-----|-----|-----|-----|-----|-----|-----|-----|-----|-----|-----|-----|-----|-----|-----|-----|-----|-----|-----|-----|-----|-----|-----|-----|-----|-----|-----|-----|-----|-----|-----|-----|-----|-----|-----|-----|-----|-----|-----|-----|-----|-----|-----|-----|-----|-----|-----|-----|-----|-----|-----|-----|-----|-----|-----|-----|-----|-----|-----|-----|-----|-----|-----|-----|-----|-----|-----|-----|-----|-----|-----|-----|-----|-----|-----|-----|-----|-----|-----|-----|-----|-----|-----|-----|-----|-----|-----|-----|-----|-----|-----|-----|-----|-----|-----|-----|-----|-----|-----|-----|-----|-----|-----|-----|-----|-----|-----|-----|-----|-----|-----|-----|-----|-----|-----|-----|-----|-----|-----|-----|-----|-----|-----|-----|-----|-----|-----|-----|-----|-----|-----|-----|-----|-----|-----|-----|-----|-----|-----|-----|-----|-----|-----|-----|-----|-----|-----|-----|-----|-----|-----|-----|-----|-----|-----|-----|-----|-----|-----|-----|-----|-----|-----|-----|-----|-----|-----|-----|-----|-----|-----|-----|-----|-----|-----|-----|-----|-----|-----|-----|-----|-----|-----|-----|-----|-----|-----|-----|-----|-----|-----|-----|-----|-----|-----|-----|-----|-----|-----|-----|-----|-----|-----|-----|-----|-----|-----|-----|-----|-----|-----|-----|-----|-----|-----|-----|-----|-----|-----|-----|-----|-----|-----|-----|-----|-----|-----|-----|-----|-----|-----|-----|-----|-----|-----|-----|-----|-----|-----|-----|-----|-----|-----|-----|-----|-----|-----|-----|-----|-----|-----|-----|-----|-----|-----|-----|-----|-----|-----|-----|-----|-----|-----|-----|-----|-----|-----|-----|-----|-----|-----|-----|-----|-----|-----|-----|-----|-----|-----|-----|-----|-----|-----|-----|-----|-----|-----|-----|-----|-----|-----|-----|-----|-----|-----|-----|-----|-----|-----|-----|-----|-----|-----|-----|-----|-----|-----|-----|-----|-----|-----|-----|-----|-----|-----|-----|-----|-----|-----|-----|-----|-----|-----|-----|-----|-----|-----|-----|-----|-----|-----|-----|-----|-----|-----|-----|-----|-----|-----|-----|-----|-----|-----|-----|-----|-----|-----|-----|-----|-----|-----|-----|-----|-----|-----|-----|-----|-----|-----|-----|-----|-----|-----|-----|-----|-----|-----|-----|-----|-----|-----|-----|-----|-----|-----|-----|-----|-----|-----|-----|-----|-----|-----|-----|-----|-----|-----|-----|-----|-----|-----|-----|-----|-----|-----|-----|-----|-----|-----|-----|-----|-----|-----|-----|-----|-----|-----|-----|-----|-----|-----|-----|-----|-----|-----|-----|-----|-----|-----|-----|-----|-----|-----|-----|-----|-----|-----|-----|-----|-----|-----|-----|-----|-----|-----|-----|-----|-----|-----|-----|-----|-----|-----|-----|-----|-----|-----|-----|-----|-----|-----|-----|-----|-----|-----|-----|-----|-----|-----|-----|-----|-----|-----|-----|-----|-----|-----|-----|-----|-----|-----|-----|-----|-----|-----|-----|-----|-----|-----|-----|-----|-----|-----|-----|-----|-----|-----|-----|-----|-----|-----|-----|-----|-----|-----|-----|-----|-----|-----|------|------|------|------|------|------|------|------|------|------|------|------|------|------|------|------|------|------|------|------|------|------|------|------|------|------|------|------|------|------|------|------|------|------|------|------|------|------|------|------|------|------|------|------|------|------|------|------|------|------|------|------|------|------|------|------|------|------|------|------|------|------|------|------|------|------|------|------|------|------|------|------|------|------|------|------|------|------|------|------|------|------|------|------|------|------|------|------|------|------|------|------|------|------|------|------|------|------|------|------|------|------|------|------|------|------|------|------|------|------|------|------|------|------|------|------|------|------|------|------|------|------|------|------|------|------|------|------|------|------|------|------|------|------|------|------|------|------|------|------|------|------|------|------|------|------|------|------|------|------|------|------|------|------|------|------|------|------|------|------|------|------|------|------|------|------|------|------|------|------|------|------|------|------|------|------|------|------|------|------|------|------|------|------|------|------|------|------|------|------|------|------|------|------|------|------|------|------|------|------|------|------|------|------|------|------|------|------|------|------|------|------|------|------|------|------|------|------|------|------|------|------|------|------|------|------|------|------|------|------|------|------|------|------|------|------|------|------|------|------|------|------|------|------|------|------|------|------|------|------|------|------|------|------|------|------|------|------|------|------|------|------|------|------|------|------|------|------|------|------|------|------|------|------|------|------|------|------|------|------|------|------|------|------|------|------|------|------|------|------|------|------|------|------|------|------|------|------|------|------|------|------|------|------|------|------|------|------|------|------|------|------|------|------|------|------|------|------|------|------|------|------|------|------|------|------|------|------|------|------|------|------|------|------|------|------|------|------|------|------|------|------|------|------|------|------|------|------|------|------|------|------|------|------|------|------|------|------|------|------|------|------|------|------|------|------|------|------|------|------|------|------|------|------|------|------|------|------|------|------|------|------|------|------|------|------|------|------|------|------|------|------|------|------|------|------|------|------|------|------|------|------|------|------|------|------|------|------|------|------|------|------|------|------|------|------|------|------|------|------|------|------|------|------|------|------|------|------|------|------|------|------|------|------|------|------|------|------|------|------|------|------|------|------|------|------|------|------|------|------|------|------|------|------|------|------|------|------|------|------|------|------|------|------|------|------|------|------|------|------|------|------|------|------|------|------|------|------|------|------|------|------|------|------|------|------|------|------|--------|
|---|---|---|---|---|---|---|---|---|----|----|----|----|----|----|----|----|----|----|----|----|----|----|----|----|----|----|----|----|----|----|----|----|----|----|----|----|----|----|----|----|----|----|----|----|----|----|----|----|----|----|----|----|----|----|----|----|----|----|----|----|----|----|----|----|----|----|----|----|----|----|----|----|----|----|----|----|----|----|----|----|----|----|----|----|----|----|----|----|----|----|----|----|----|----|----|----|----|----|-----|-----|-----|-----|-----|-----|-----|-----|-----|-----|-----|-----|-----|-----|-----|-----|-----|-----|-----|-----|-----|-----|-----|-----|-----|-----|-----|-----|-----|-----|-----|-----|-----|-----|-----|-----|-----|-----|-----|-----|-----|-----|-----|-----|-----|-----|-----|-----|-----|-----|-----|-----|-----|-----|-----|-----|-----|-----|-----|-----|-----|-----|-----|-----|-----|-----|-----|-----|-----|-----|-----|-----|-----|-----|-----|-----|-----|-----|-----|-----|-----|-----|-----|-----|-----|-----|-----|-----|-----|-----|-----|-----|-----|-----|-----|-----|-----|-----|-----|-----|-----|-----|-----|-----|-----|-----|-----|-----|-----|-----|-----|-----|-----|-----|-----|-----|-----|-----|-----|-----|-----|-----|-----|-----|-----|-----|-----|-----|-----|-----|-----|-----|-----|-----|-----|-----|-----|-----|-----|-----|-----|-----|-----|-----|-----|-----|-----|-----|-----|-----|-----|-----|-----|-----|-----|-----|-----|-----|-----|-----|-----|-----|-----|-----|-----|-----|-----|-----|-----|-----|-----|-----|-----|-----|-----|-----|-----|-----|-----|-----|-----|-----|-----|-----|-----|-----|-----|-----|-----|-----|-----|-----|-----|-----|-----|-----|-----|-----|-----|-----|-----|-----|-----|-----|-----|-----|-----|-----|-----|-----|-----|-----|-----|-----|-----|-----|-----|-----|-----|-----|-----|-----|-----|-----|-----|-----|-----|-----|-----|-----|-----|-----|-----|-----|-----|-----|-----|-----|-----|-----|-----|-----|-----|-----|-----|-----|-----|-----|-----|-----|-----|-----|-----|-----|-----|-----|-----|-----|-----|-----|-----|-----|-----|-----|-----|-----|-----|-----|-----|-----|-----|-----|-----|-----|-----|-----|-----|-----|-----|-----|-----|-----|-----|-----|-----|-----|-----|-----|-----|-----|-----|-----|-----|-----|-----|-----|-----|-----|-----|-----|-----|-----|-----|-----|-----|-----|-----|-----|-----|-----|-----|-----|-----|-----|-----|-----|-----|-----|-----|-----|-----|-----|-----|-----|-----|-----|-----|-----|-----|-----|-----|-----|-----|-----|-----|-----|-----|-----|-----|-----|-----|-----|-----|-----|-----|-----|-----|-----|-----|-----|-----|-----|-----|-----|-----|-----|-----|-----|-----|-----|-----|-----|-----|-----|-----|-----|-----|-----|-----|-----|-----|-----|-----|-----|-----|-----|-----|-----|-----|-----|-----|-----|-----|-----|-----|-----|-----|-----|-----|-----|-----|-----|-----|-----|-----|-----|-----|-----|-----|-----|-----|-----|-----|-----|-----|-----|-----|-----|-----|-----|-----|-----|-----|-----|-----|-----|-----|-----|-----|-----|-----|-----|-----|-----|-----|-----|-----|-----|-----|-----|-----|-----|-----|-----|-----|-----|-----|-----|-----|-----|-----|-----|-----|-----|-----|-----|-----|-----|-----|-----|-----|-----|-----|-----|-----|-----|-----|-----|-----|-----|-----|-----|-----|-----|-----|-----|-----|-----|-----|-----|-----|-----|-----|-----|-----|-----|-----|-----|-----|-----|-----|-----|-----|-----|-----|-----|-----|-----|-----|-----|-----|-----|-----|-----|-----|-----|-----|-----|-----|-----|-----|-----|-----|-----|-----|-----|-----|-----|-----|-----|-----|-----|-----|-----|-----|-----|-----|-----|-----|-----|-----|-----|-----|-----|-----|-----|-----|-----|-----|-----|-----|-----|-----|-----|-----|-----|-----|-----|-----|-----|-----|-----|-----|-----|-----|-----|-----|-----|-----|-----|-----|-----|-----|-----|-----|-----|-----|-----|-----|-----|-----|-----|-----|-----|-----|-----|-----|-----|-----|-----|-----|-----|-----|-----|-----|-----|-----|-----|-----|-----|-----|-----|-----|-----|-----|-----|-----|-----|-----|-----|-----|-----|-----|-----|-----|-----|-----|-----|-----|-----|-----|-----|-----|-----|-----|-----|-----|-----|-----|-----|-----|-----|-----|-----|-----|-----|-----|-----|-----|-----|-----|-----|-----|-----|-----|-----|-----|-----|-----|-----|-----|-----|-----|-----|-----|-----|-----|-----|-----|-----|-----|-----|-----|-----|-----|-----|-----|-----|-----|-----|-----|-----|-----|-----|-----|-----|-----|-----|-----|-----|-----|-----|-----|-----|-----|-----|-----|-----|-----|-----|-----|-----|-----|-----|-----|-----|-----|-----|-----|-----|-----|-----|-----|-----|-----|-----|-----|-----|-----|-----|-----|-----|-----|-----|-----|-----|-----|-----|-----|-----|-----|-----|-----|-----|-----|-----|-----|-----|-----|-----|-----|-----|-----|-----|-----|-----|-----|-----|-----|-----|-----|-----|-----|-----|-----|-----|-----|-----|-----|-----|-----|-----|-----|-----|-----|-----|-----|-----|-----|-----|-----|-----|-----|-----|-----|-----|-----|-----|-----|-----|-----|-----|-----|-----|-----|-----|-----|-----|-----|-----|-----|-----|-----|-----|-----|-----|-----|-----|-----|-----|-----|-----|-----|-----|-----|-----|-----|-----|-----|-----|-----|-----|-----|-----|-----|-----|-----|-----|-----|-----|-----|-----|-----|-----|-----|-----|-----|-----|-----|-----|-----|-----|-----|-----|-----|-----|-----|-----|-----|-----|-----|-----|-----|-----|-----|-----|-----|-----|-----|-----|-----|-----|-----|-----|-----|-----|-----|-----|-----|-----|-----|-----|-----|-----|-----|-----|-----|-----|-----|-----|-----|-----|-----|-----|-----|-----|-----|-----|-----|-----|-----|-----|-----|-----|-----|-----|-----|-----|-----|-----|-----|-----|-----|-----|-----|-----|-----|-----|-----|-----|-----|-----|-----|-----|-----|-----|-----|-----|-----|-----|-----|-----|-----|-----|-----|-----|-----|-----|-----|-----|-----|-----|-----|-----|-----|-----|-----|-----|-----|-----|------|------|------|------|------|------|------|------|------|------|------|------|------|------|------|------|------|------|------|------|------|------|------|------|------|------|------|------|------|------|------|------|------|------|------|------|------|------|------|------|------|------|------|------|------|------|------|------|------|------|------|------|------|------|------|------|------|------|------|------|------|------|------|------|------|------|------|------|------|------|------|------|------|------|------|------|------|------|------|------|------|------|------|------|------|------|------|------|------|------|------|------|------|------|------|------|------|------|------|------|------|------|------|------|------|------|------|------|------|------|------|------|------|------|------|------|------|------|------|------|------|------|------|------|------|------|------|------|------|------|------|------|------|------|------|------|------|------|------|------|------|------|------|------|------|------|------|------|------|------|------|------|------|------|------|------|------|------|------|------|------|------|------|------|------|------|------|------|------|------|------|------|------|------|------|------|------|------|------|------|------|------|------|------|------|------|------|------|------|------|------|------|------|------|------|------|------|------|------|------|------|------|------|------|------|------|------|------|------|------|------|------|------|------|------|------|------|------|------|------|------|------|------|------|------|------|------|------|------|------|------|------|------|------|------|------|------|------|------|------|------|------|------|------|------|------|------|------|------|------|------|------|------|------|------|------|------|------|------|------|------|------|------|------|------|------|------|------|------|------|------|------|------|------|------|------|------|------|------|------|------|------|------|------|------|------|------|------|------|------|------|------|------|------|------|------|------|------|------|------|------|------|------|------|------|------|------|------|------|------|------|------|------|------|------|------|------|------|------|------|------|------|------|------|------|------|------|------|------|------|------|------|------|------|------|------|------|------|------|------|------|------|------|------|------|------|------|------|------|------|------|------|------|------|------|------|------|------|------|------|------|------|------|------|------|------|------|------|------|------|------|------|------|------|------|------|------|------|------|------|------|------|------|------|------|------|------|------|------|------|------|------|------|------|------|------|------|------|------|------|------|------|------|------|------|------|------|------|------|------|------|------|------|------|------|------|------|------|------|------|------|------|------|------|------|------|------|------|------|------|------|------|------|------|------|------|------|------|------|------|------|------|------|------|------|------|------|------|------|------|------|------|------|------|------|------|------|------|------|------|------|------|------|------|------|------|------|------|------|------|------|------|------|------|------|------|------|------|------|------|------|------|------|------|------|------|------|------|--------|

|                                             | Total | % Total | % ENSAFavg | % Total normalized spectral counts |
|---------------------------------------------|-------|---------|------------|------------------------------------|
| Detected Proteins                           | 1541  |         |            |                                    |
| Proteins with Predicted+1                   | 848   | 45.9%   | 6.73%      | 62.41                              |
| Proteins with Signal Peptide/Anchor only    | 220   | 11.9%   | 6.71%      | 14.53                              |
| Soluble Proteins (no TM, no signal peptide) | 773   | 42.1%   | 6.27%      | 25.47                              |
