# Supplementary material for: The Leukocyte Nuclear Envelope Proteome Varies with Cell Activation and Contains Novel Transmembrane Proteins That Affect Genome Architecture
Source: PubMed Central journal article supplement — Mol Cell Proteomics. 2010 Aug 6;9(12):2571–85. doi: 10.1074/mcp.M110.002915 (PMC3101955; doi:10.1074/mcp.m110.002915), 2010-08-06
Supplement: supp_M110.002915_KorfaliMCP_SuppTableS5.pdf [file supp_M110.002915_KorfaliMCP_SuppTableS5.pdf]

3

[illegible]

[illegible]

6







[illegible]

11

[illegible]







1







| Age Group | Total | Male  | Female | Male  | Female |
|-----------|-------|-------|--------|-------|--------|
| 18-24     | 28.5% | 28.5% | 28.5%  | 28.5% | 28.5%  |
| 25-34     | 22.5% | 22.5% | 22.5%  | 22.5% | 22.5%  |
| 35-44     | 18.5% | 18.5% | 18.5%  | 18.5% | 18.5%  |
| 45-54     | 12.5% | 12.5% | 12.5%  | 12.5% | 12.5%  |
| 55-64     | 8.5%  | 8.5%  | 8.5%   | 8.5%  | 8.5%   |
| 65+       | 5.5%  | 5.5%  | 5.5%   | 5.5%  | 5.5%   |



11. <http://www.who.int>

23
